# Supplementary material for: Machine learning-based q-RASPR modeling of power conversion efficiency of organic dyes in dye-sensitized solar cells
Source: Royal Society of Chemistry journal article supplement (doi:10.1039/d3se00457k), 2023-01-01
Supplement: d3se00457k2.pdf [file d3se00457k2.pdf]

# **Machine Learning - Based q-RASPR Modeling of Power Conversion Efficiency of Organic Dyes in Dye-Sensitized Solar Cells**

**Souvik Pore, Arkaprava Banerjee, Kunal Roy\***

Drug Theoretics and Chemoinformatics Laboratory,  
Department of Pharmaceutical Technology, Jadavpur University,  
188 Raja S C Mullick Road, 700032, Kolkata, India

## **Supplementary Materials SI-3**

Corresponding author

Prof. Kunal Roy, Phone: +91 9831594140; Fax: +91-33-2837-1078;

Email: [kunalroy\\_in@yahoo.com](mailto:kunalroy_in@yahoo.com); [kunal.roy@jadavpuruniversity.in](mailto:kunal.roy@jadavpuruniversity.in)

A partial dependence plot shows the marginal effect of a feature (or two features) on the predicted outcome of a machine learning model. This plot can suggest the dependence interaction between two features. In case of an interaction with the other feature, a distinct vertical pattern of coloring will be seen.

## Dependence Plots for the Coumarin Dataset:

### XGBoost:

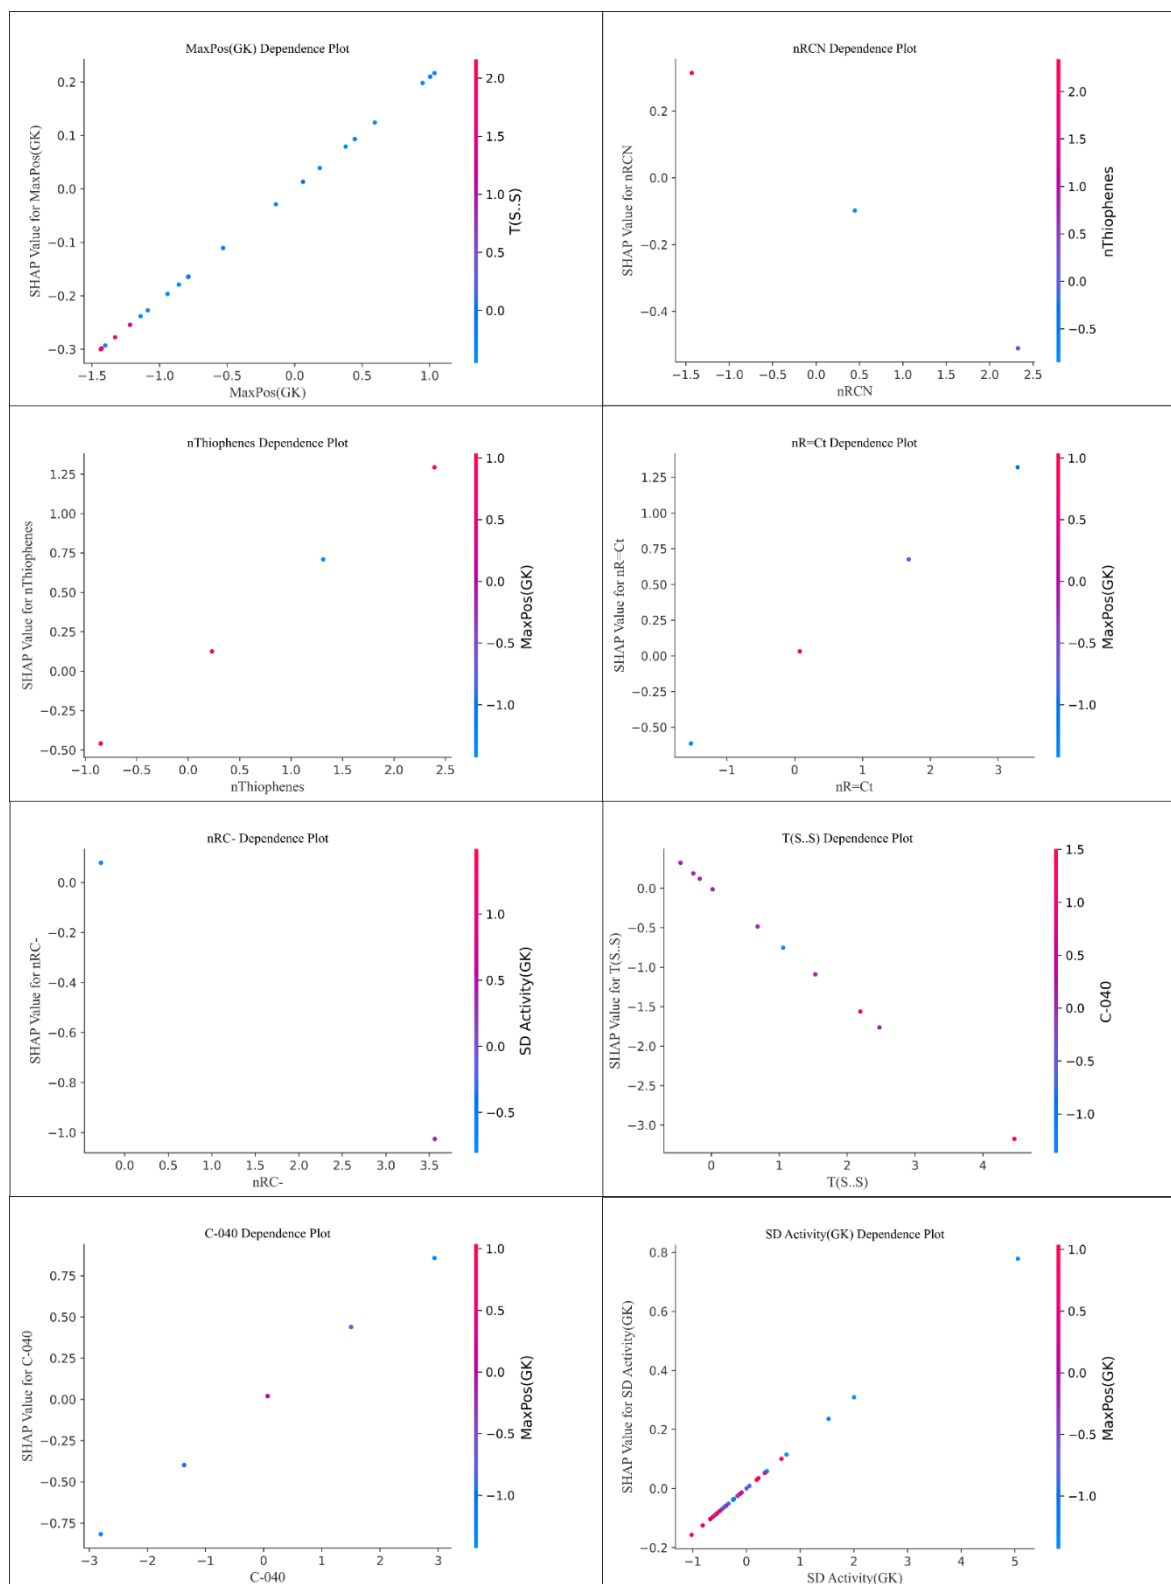

Fig. S13. SHAP dependence plot of the XGBoost model for the Coumarin Dataset. In this plot, the feature value is represented along the x axis and the corresponding shap values are represented along the y-axis. Interaction with other descriptors is represented through the color gradient.

# Ridge Regression:

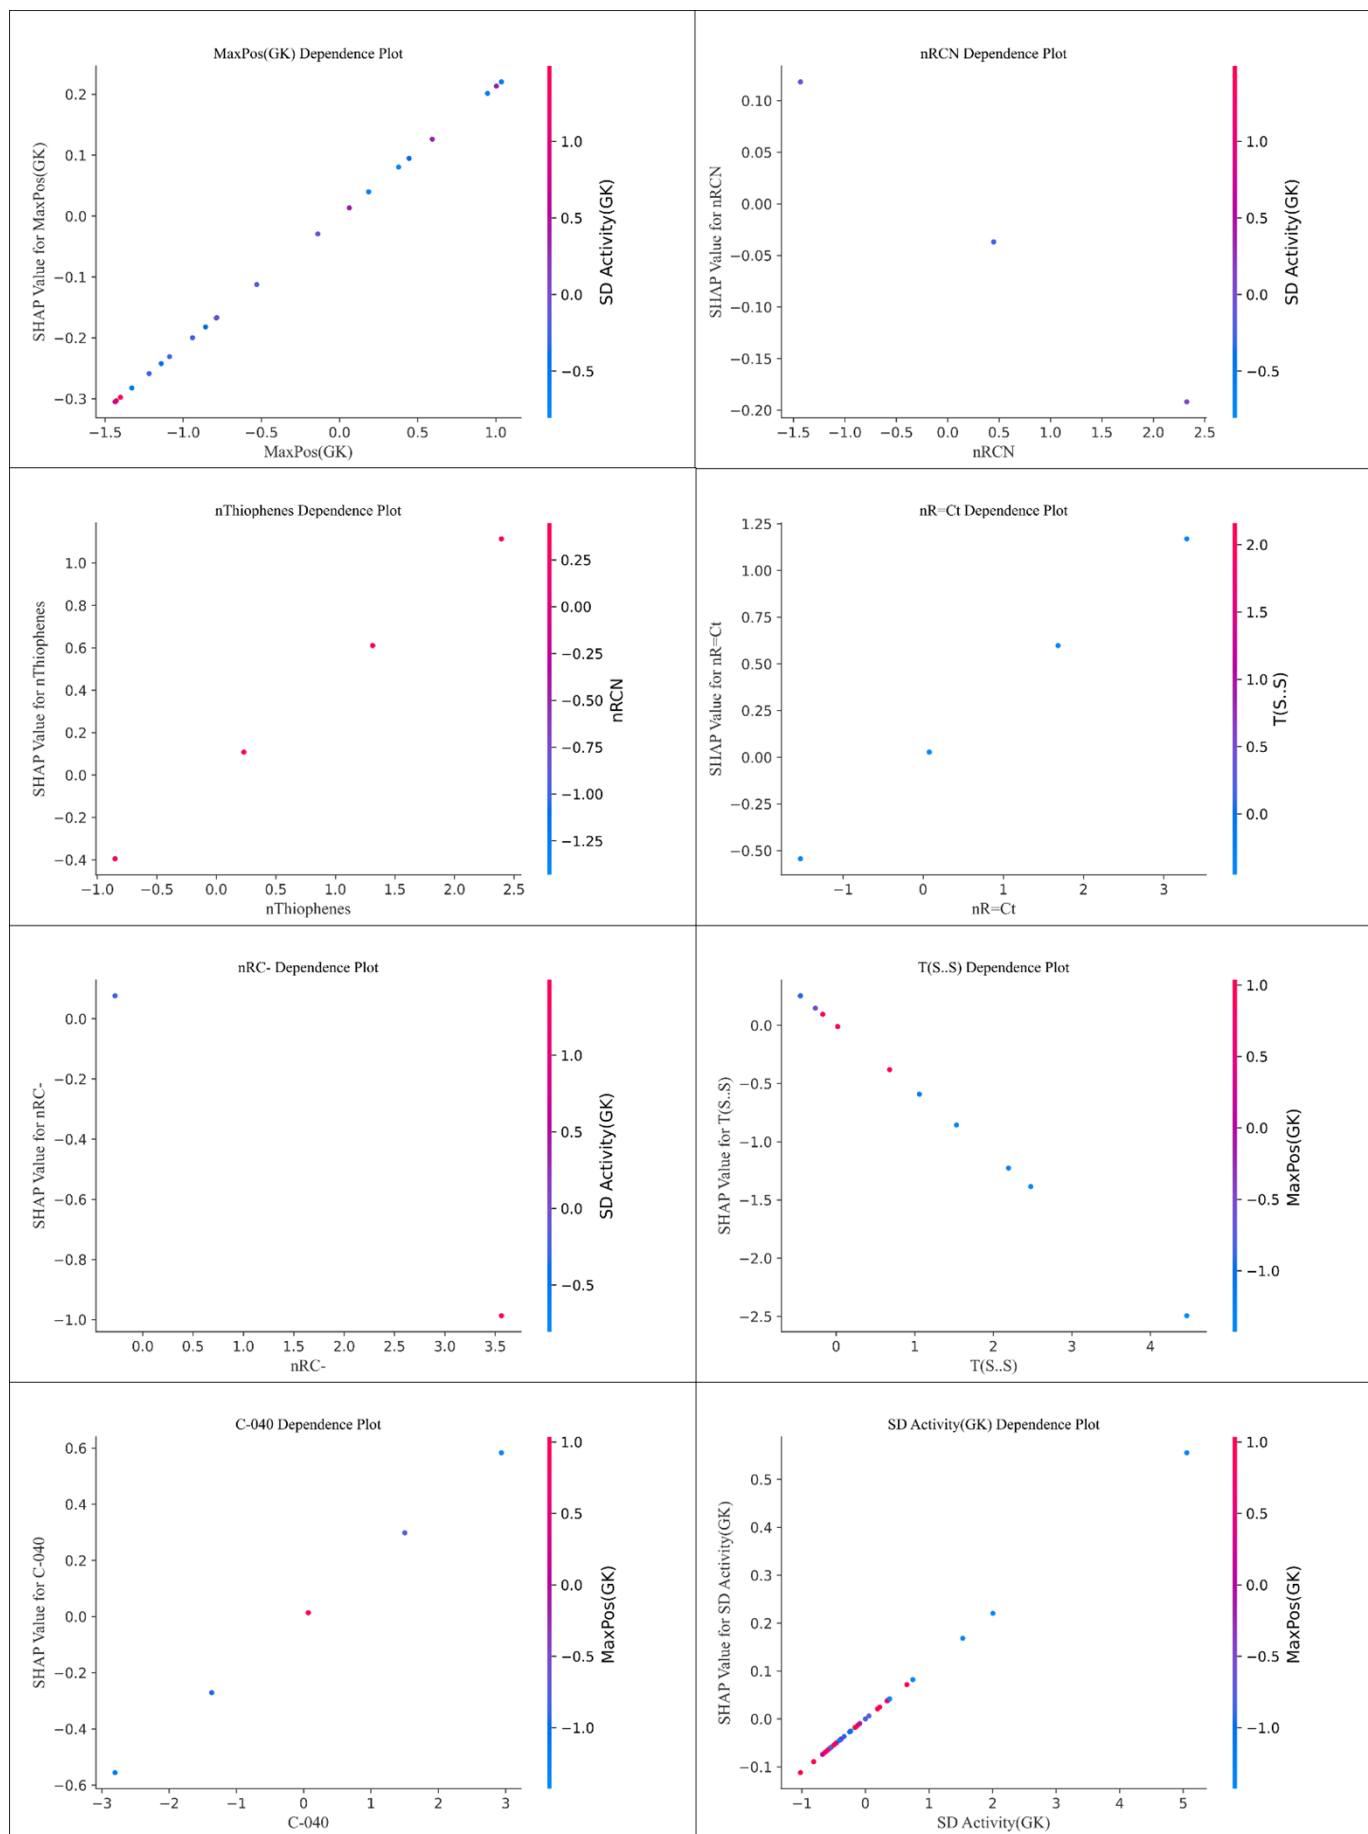

Fig. S14. SHAP dependence plot of the Ridge Regression model for the Coumarin Dataset. In this plot, the feature value is represented along the x axis and the corresponding shap values are represented along the y-axis. Interaction with other descriptors is represented through the color gradient.

PLS:

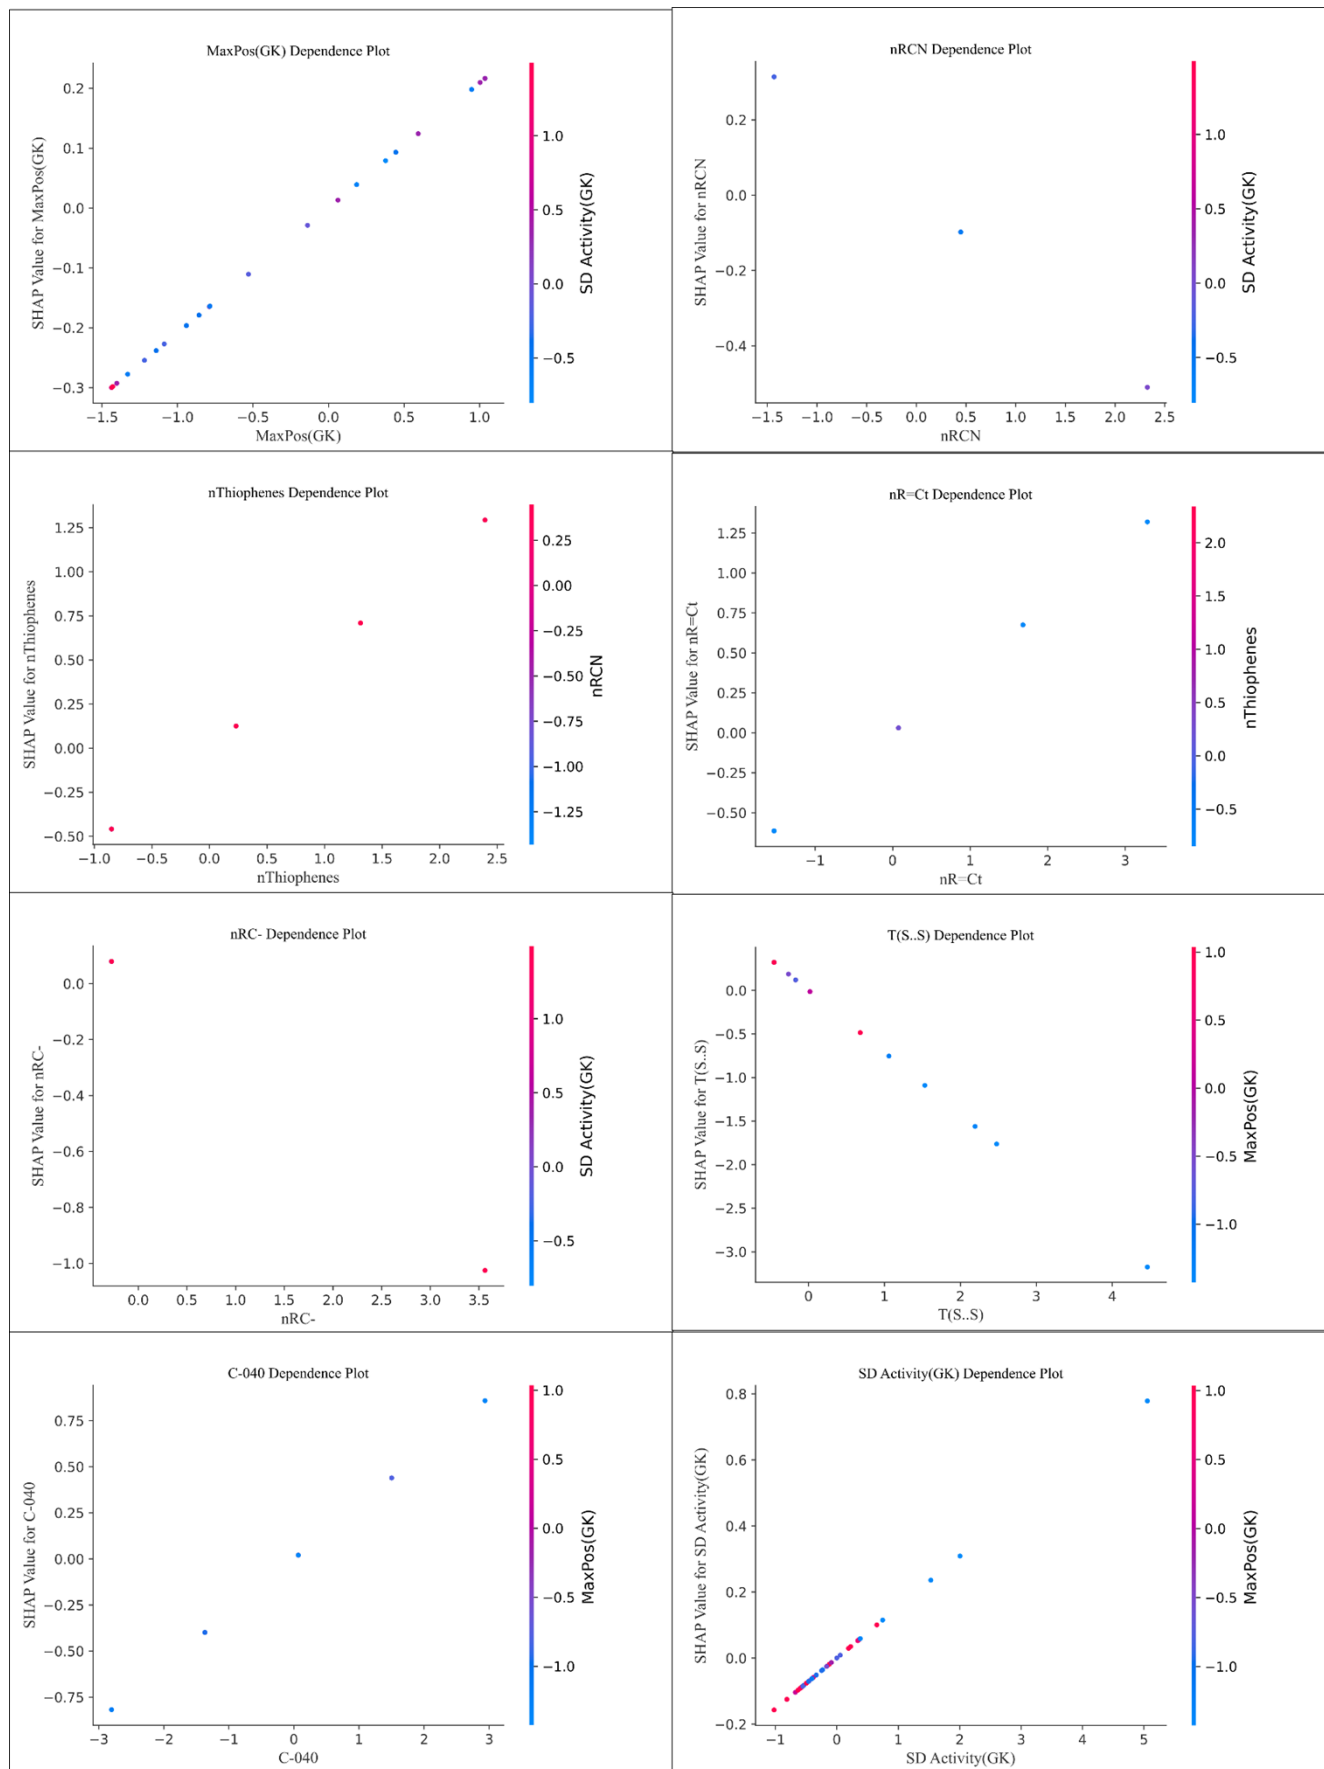

Fig. S15. SHAP dependence plot of the PLS model for the Coumarin Dataset. In this plot, the feature value is represented along the x axis and the corresponding shap values are represented along the y-axis. Interaction with other descriptors is represented through the color gradient.

# Dependence Plots for the Carbazole Dataset:

## XGBoost:

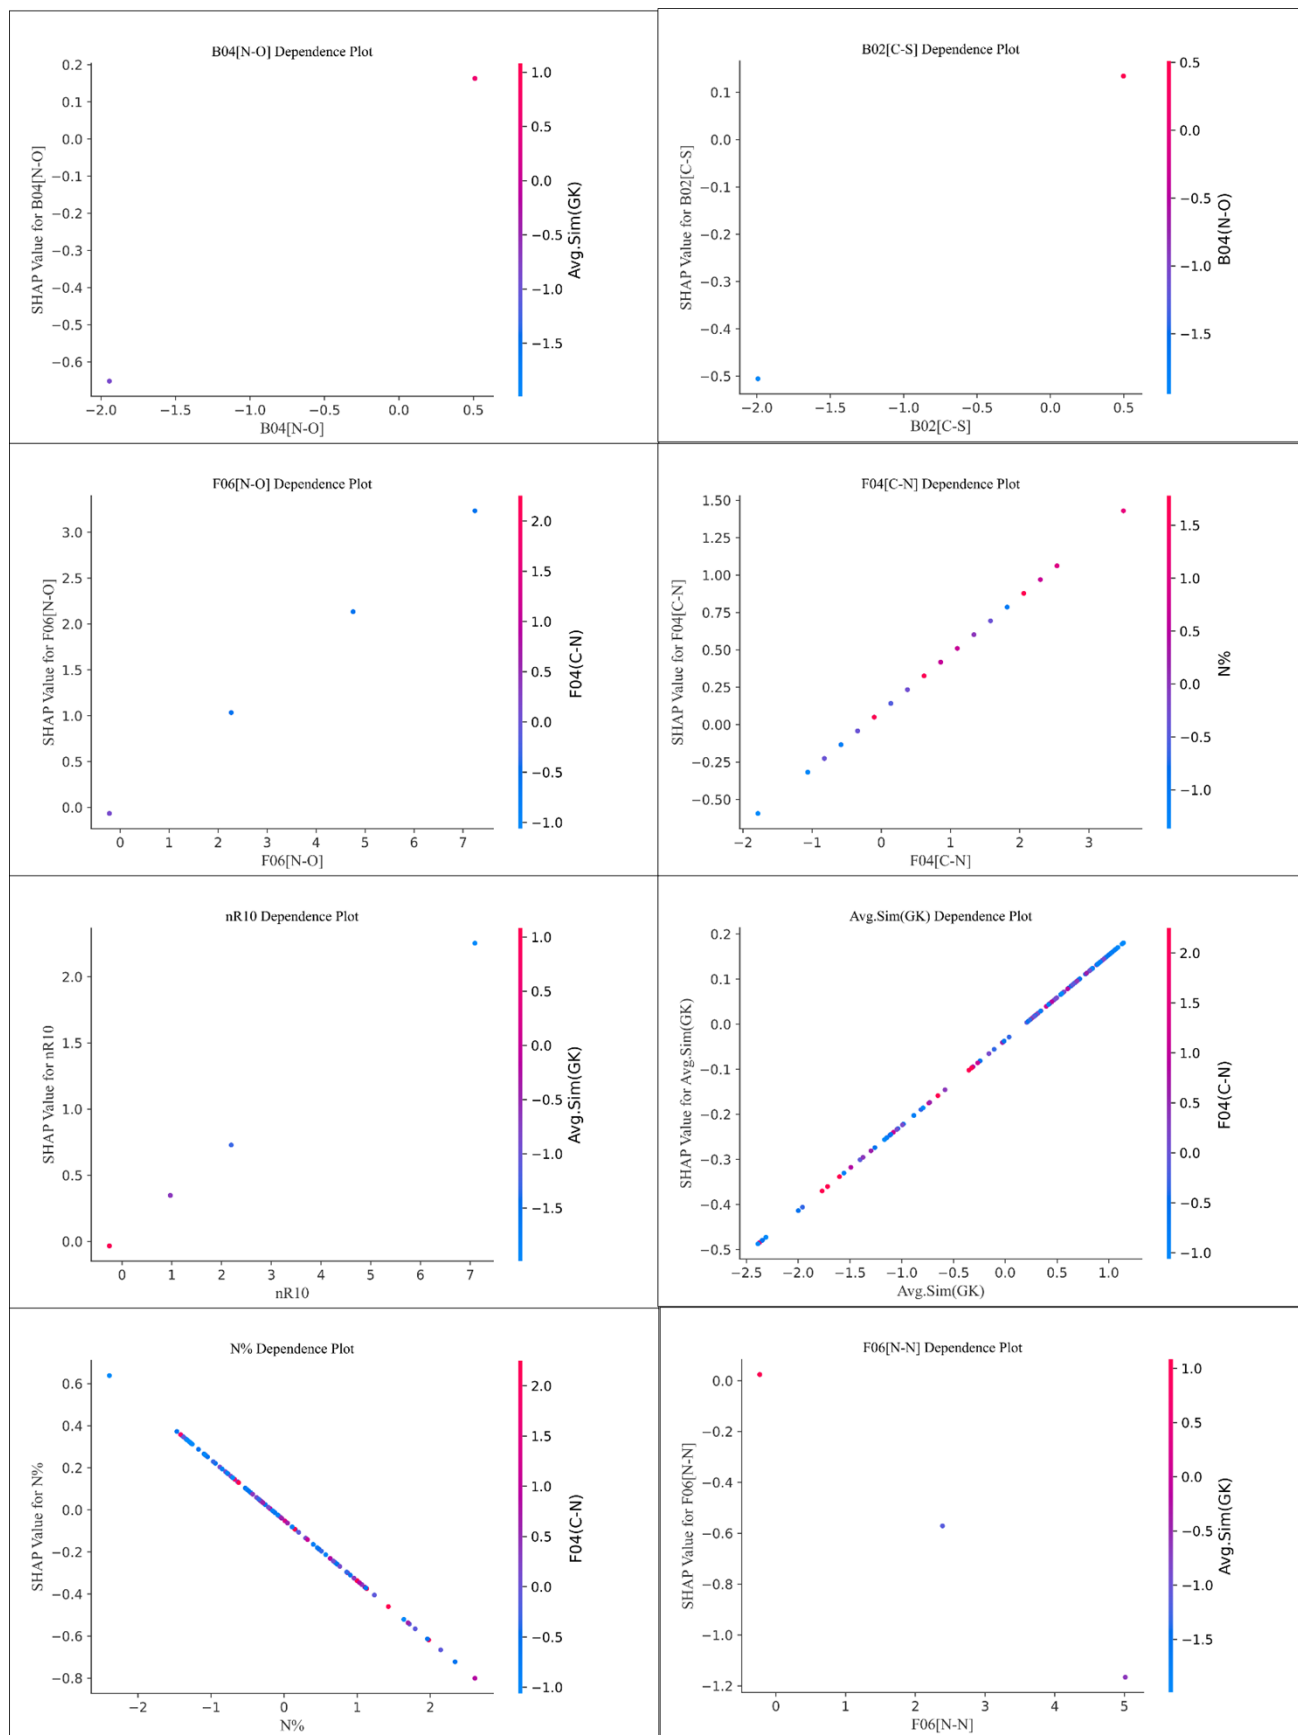

Fig. S16. SHAP dependence plot of the XGBoost model for the Carbazole Dataset. In this plot, the feature value is represented along the x axis and the corresponding shap values are represented along the y-axis. Interaction with other descriptors is represented through the color gradient.



# Ridge Regression:

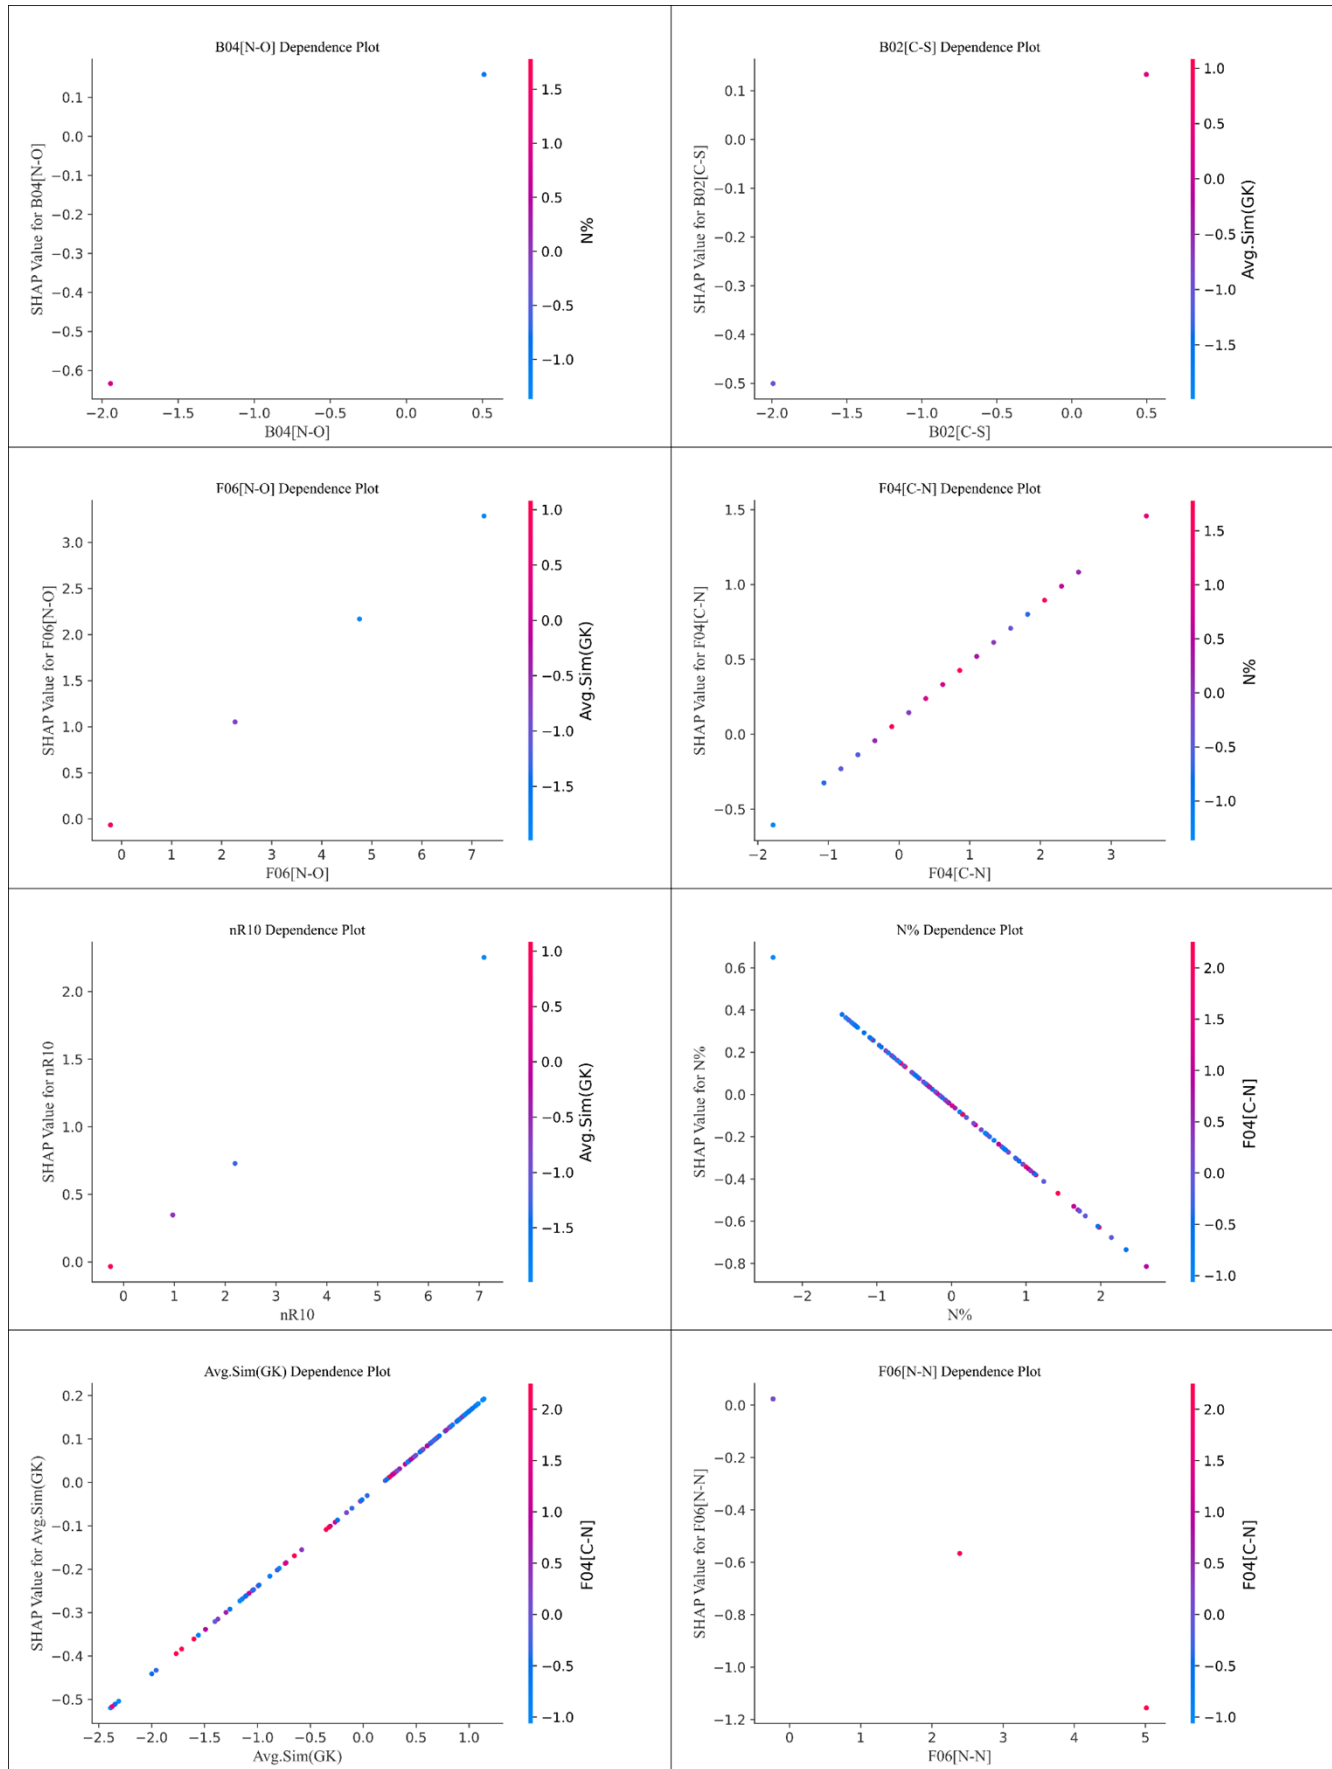

Fig. S17. SHAP dependence plot of the Ridge Regression model for the Carbazole Dataset. In this plot, the feature value is represented along the x axis and the corresponding shap values are represented along the y-axis. Interaction with other descriptors is represented through the color gradient.

PLS:

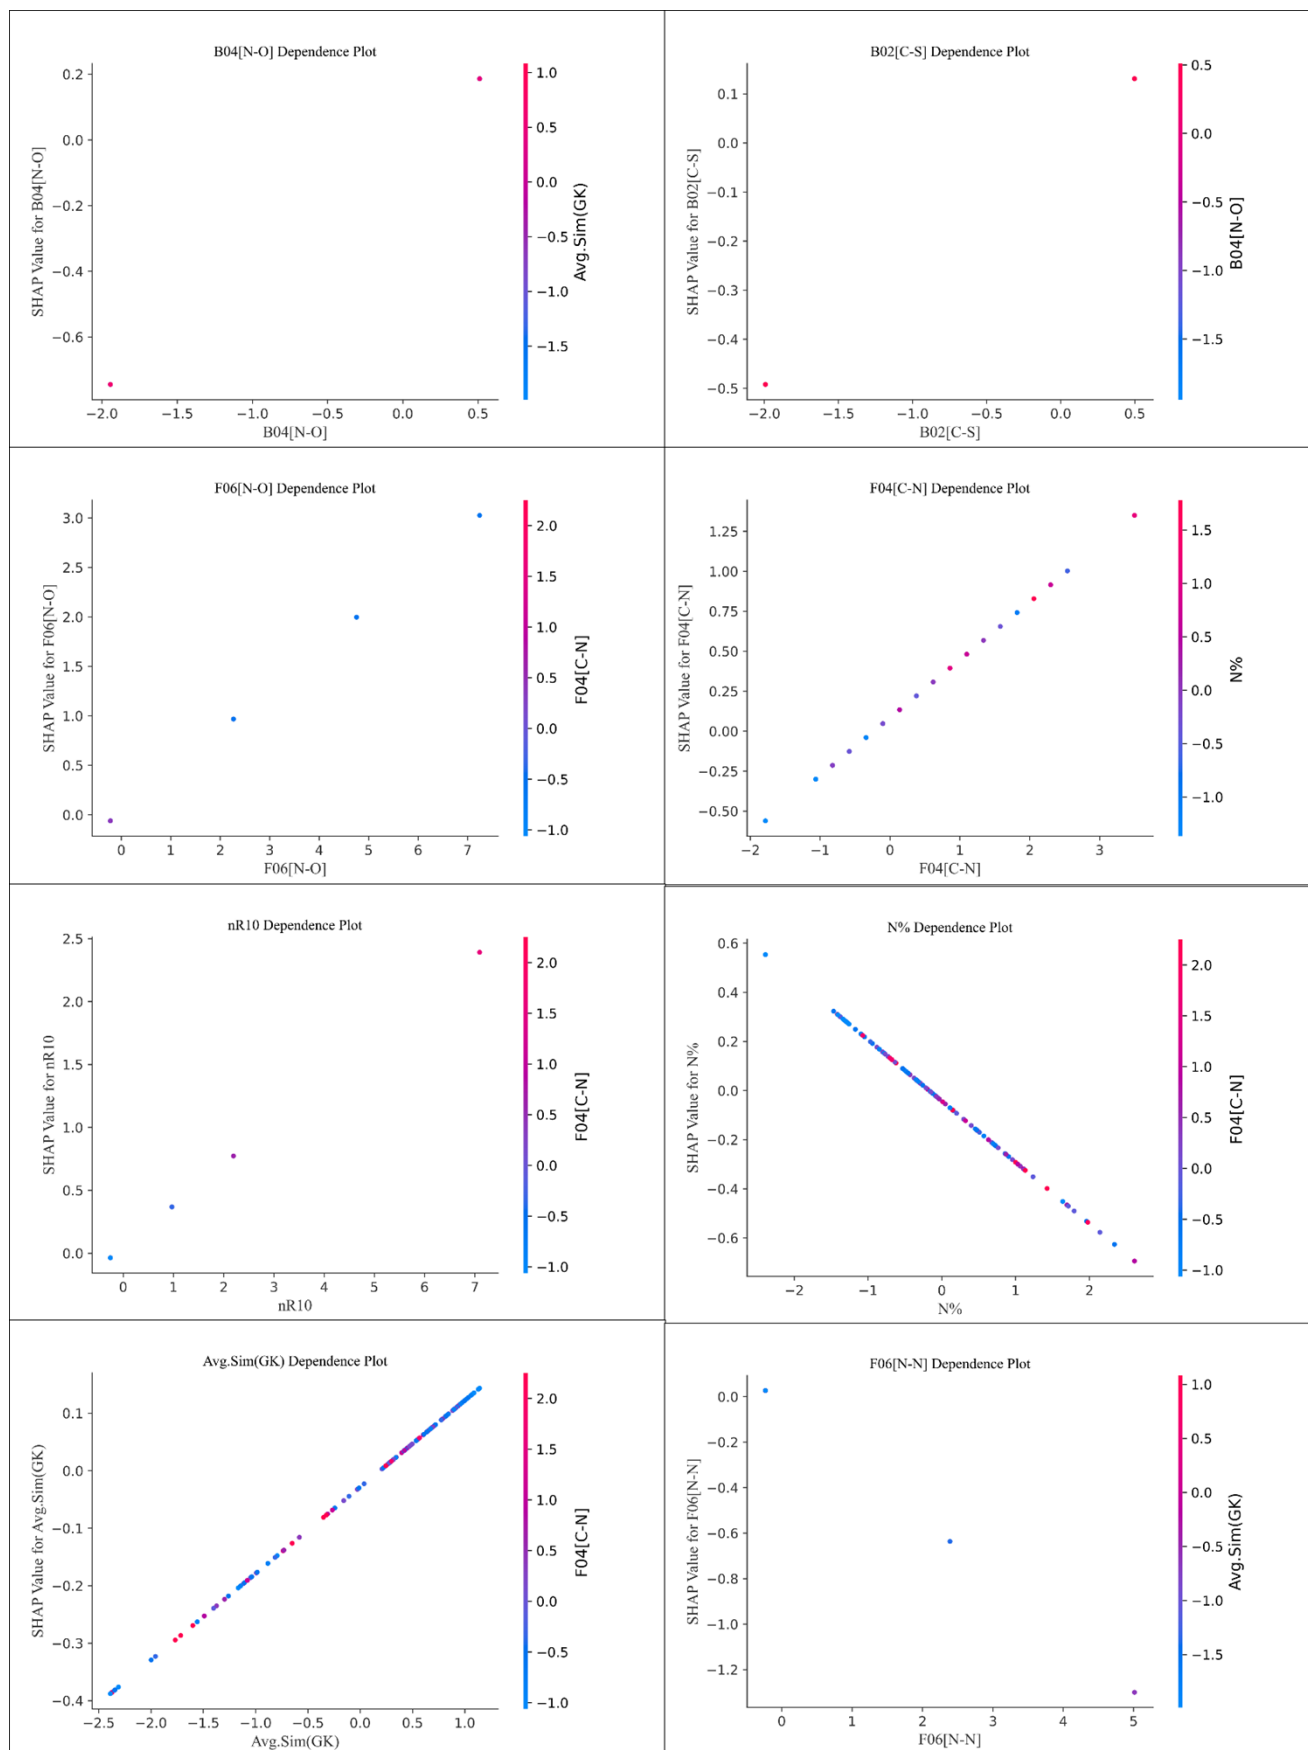

Fig. S18. SHAP dependence plot of the PLS model for the Carbazole Dataset. In this plot, the feature value is represented along the x axis and the corresponding shap values are represented along the y-axis. Interaction with other descriptors is represented through the color gradient.

# Dependence Plots for the Indoline Dataset:

## XGBoost:

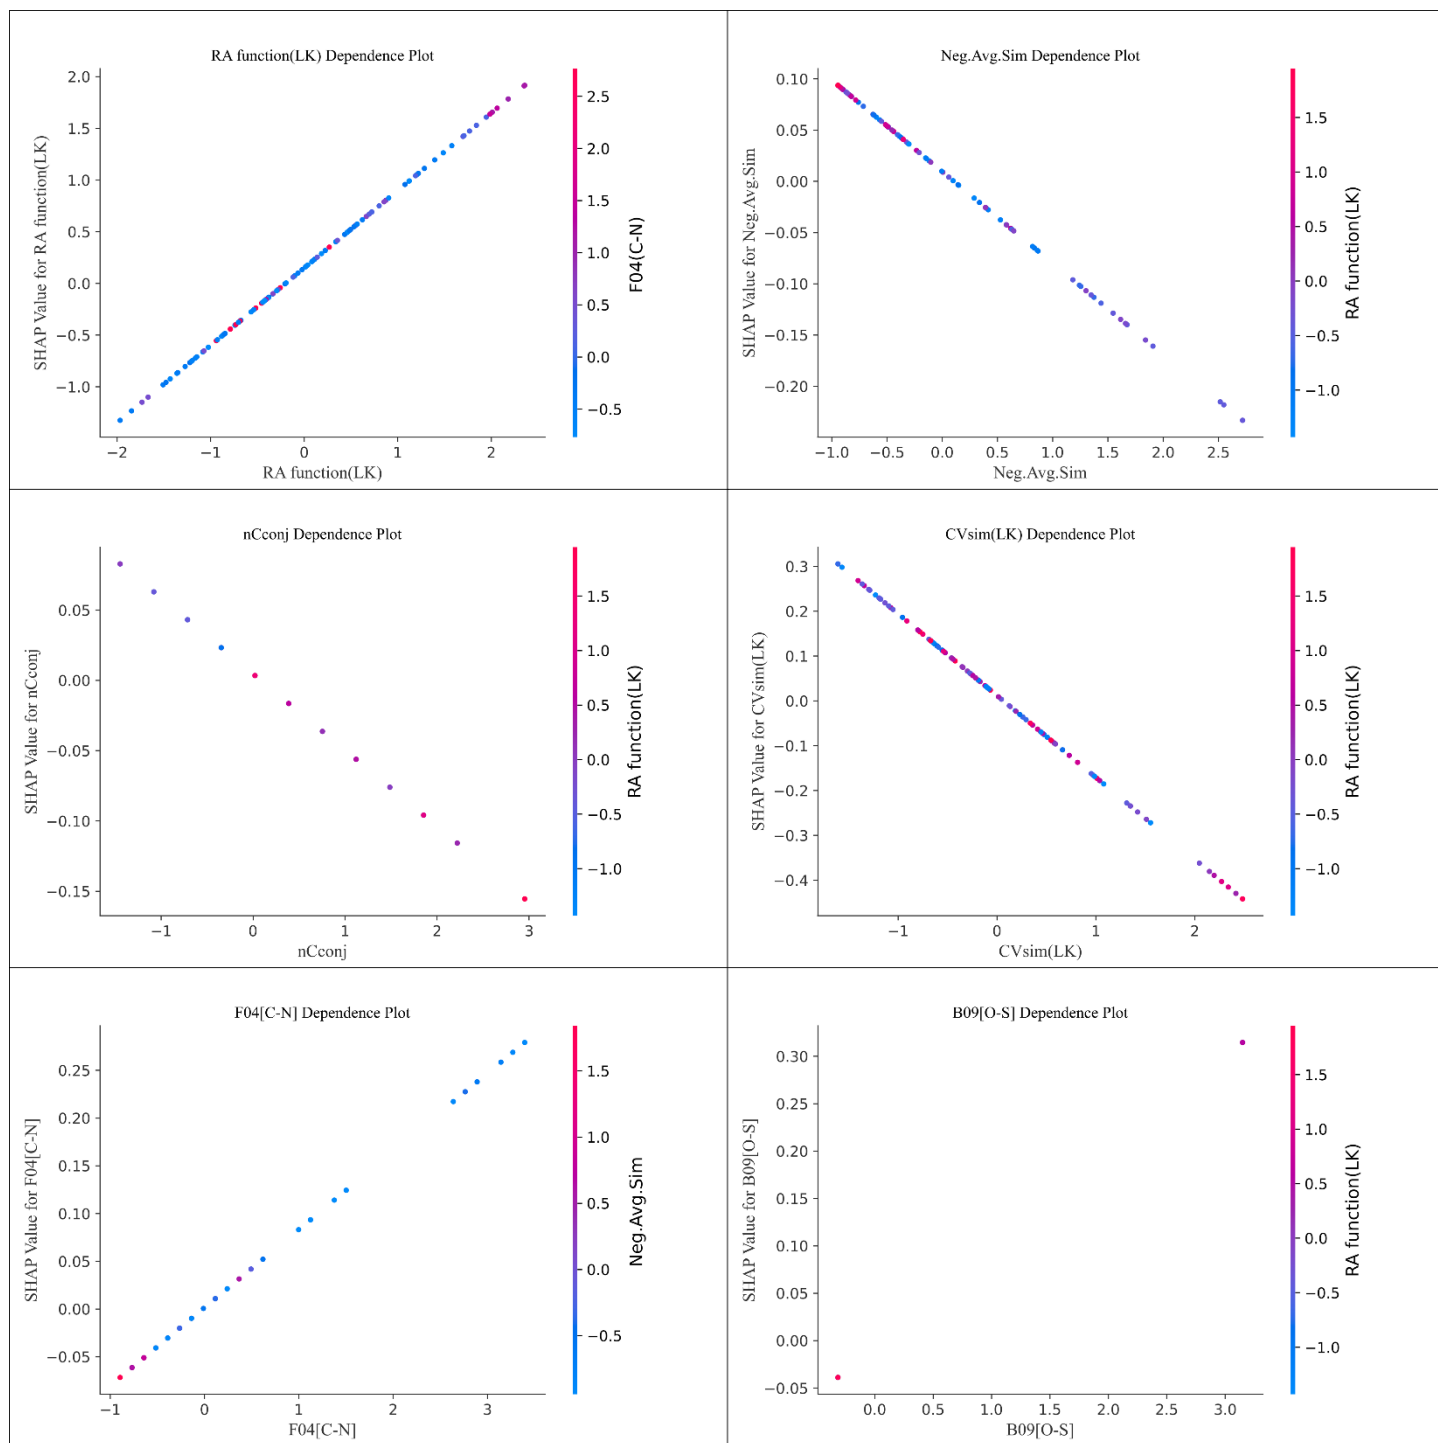

Fig. S19. SHAP dependence plot of the XGBoost model for the Indoline Dataset. In this plot, the feature value is represented along the x axis and the corresponding shap values are represented along the y-axis. Interaction with other descriptors is represented through the color gradient.

## Ridge Regression:

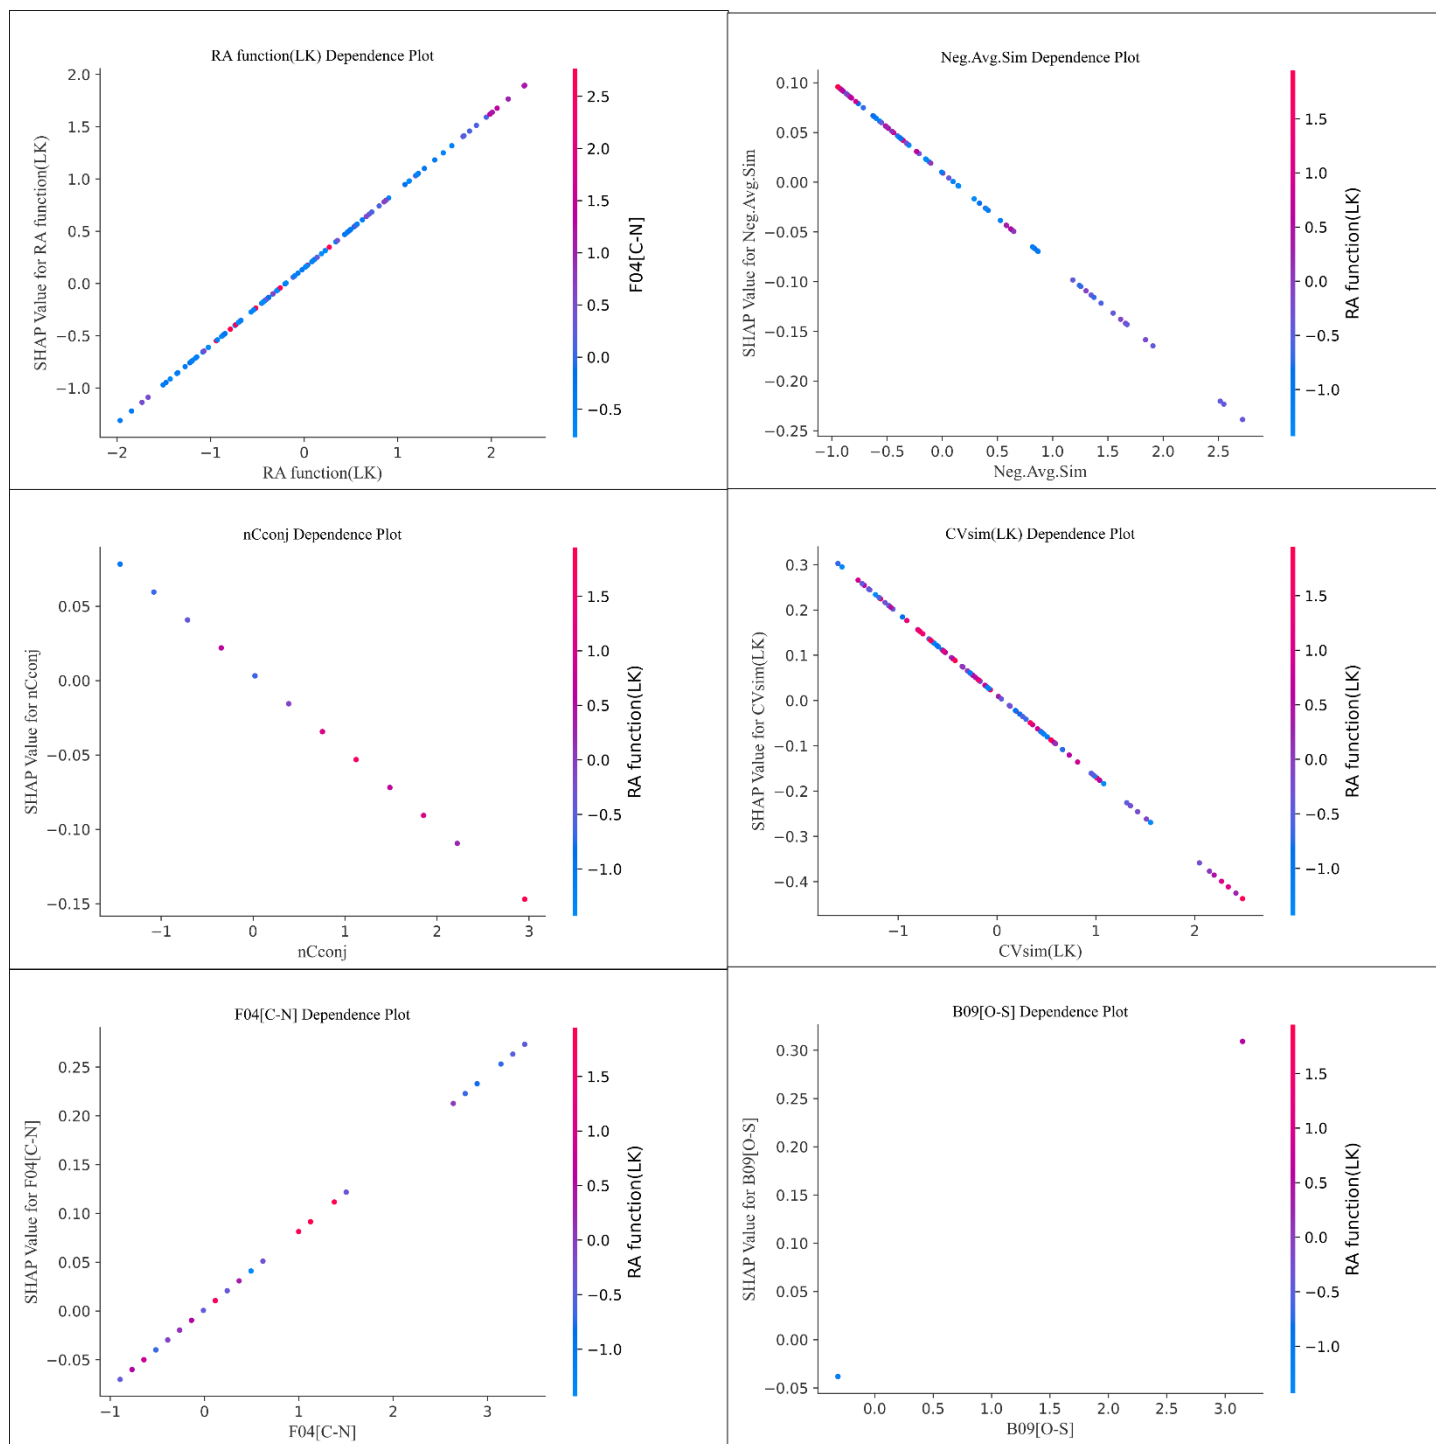

Fig. S20. SHAP dependence plot of the Ridge Regression model for the Indoline Dataset. In this plot, the feature value is represented along the x axis and the corresponding shap values are represented along the y-axis. Interaction with other descriptors is represented through the color gradient.

PLS:

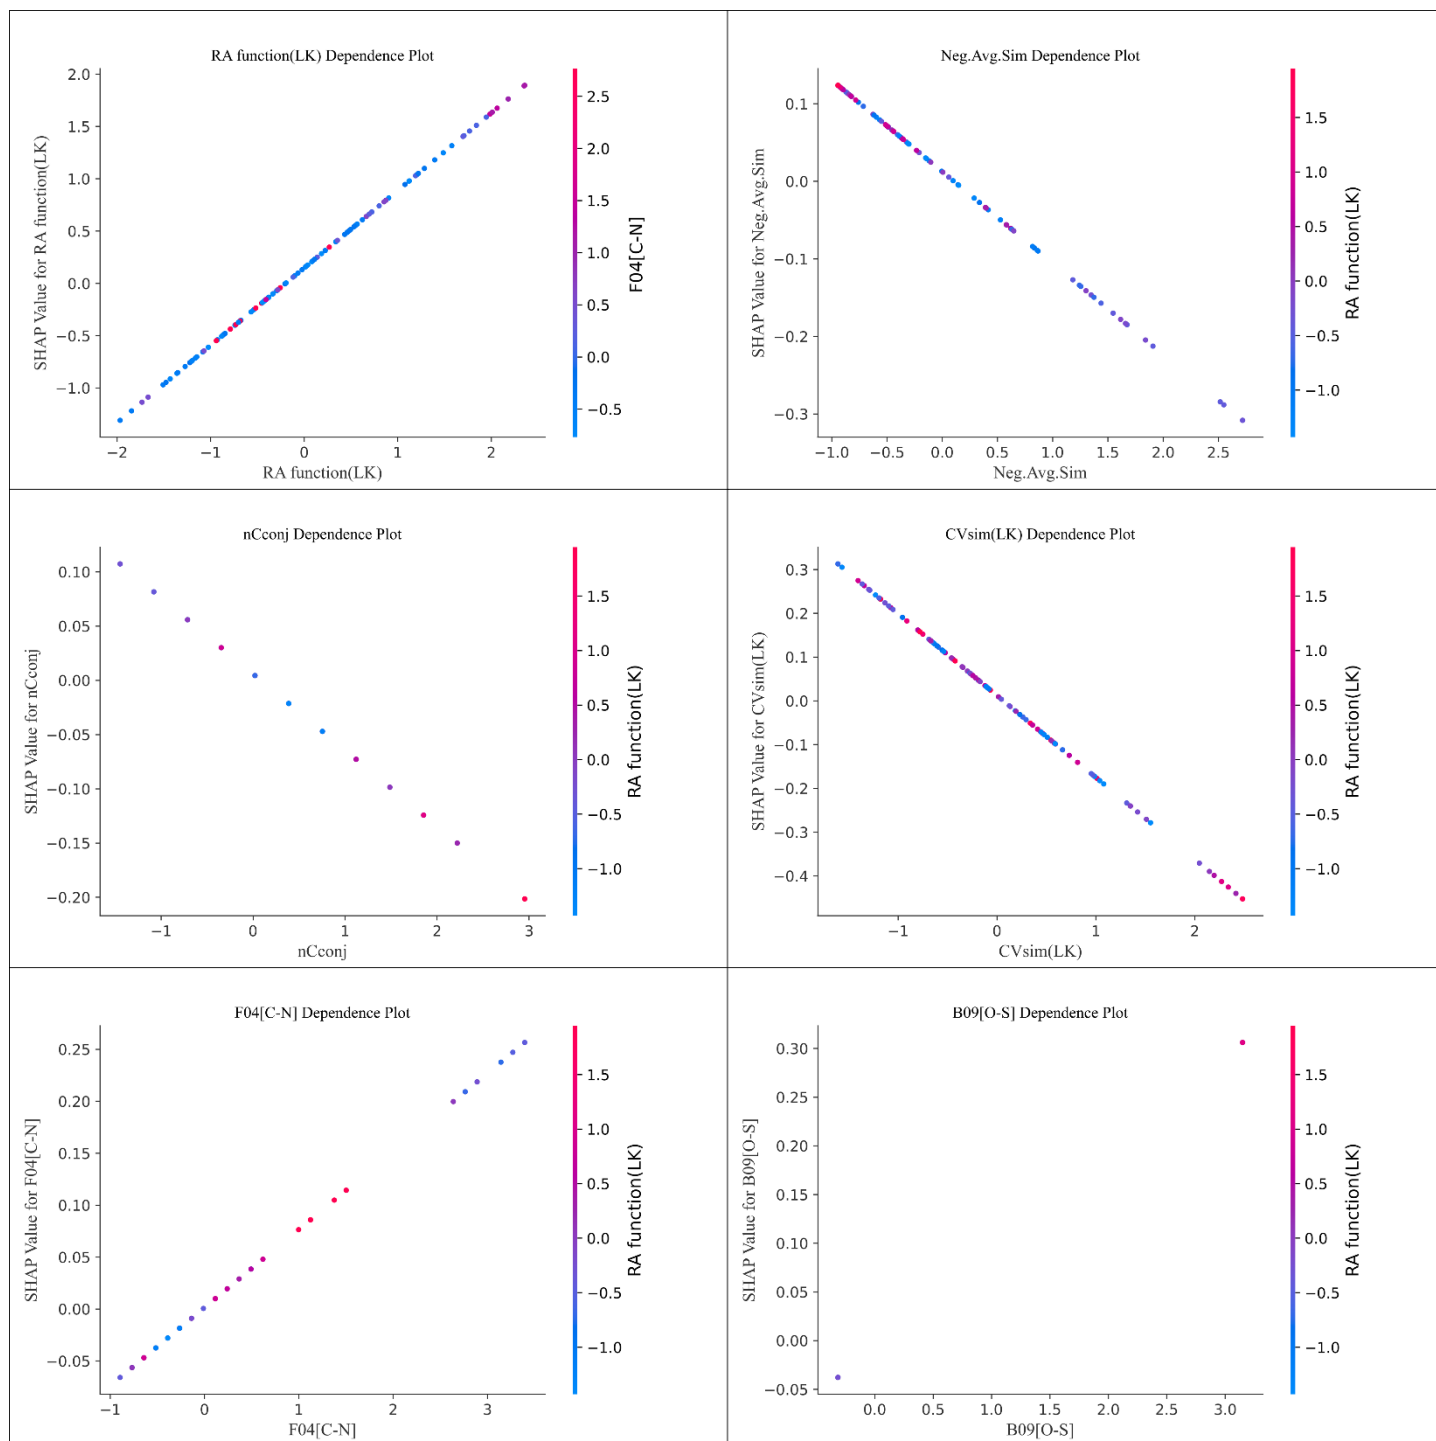

Fig. S21. SHAP dependence plot of the PLS model for the Indoline Dataset. In this plot, the feature value is represented along the x axis and the corresponding shap values are represented along the y-axis. Interaction with other descriptors is represented through the color gradient.

## Dependence Plots for the Diphenylamine Dataset:

### XGBoost:

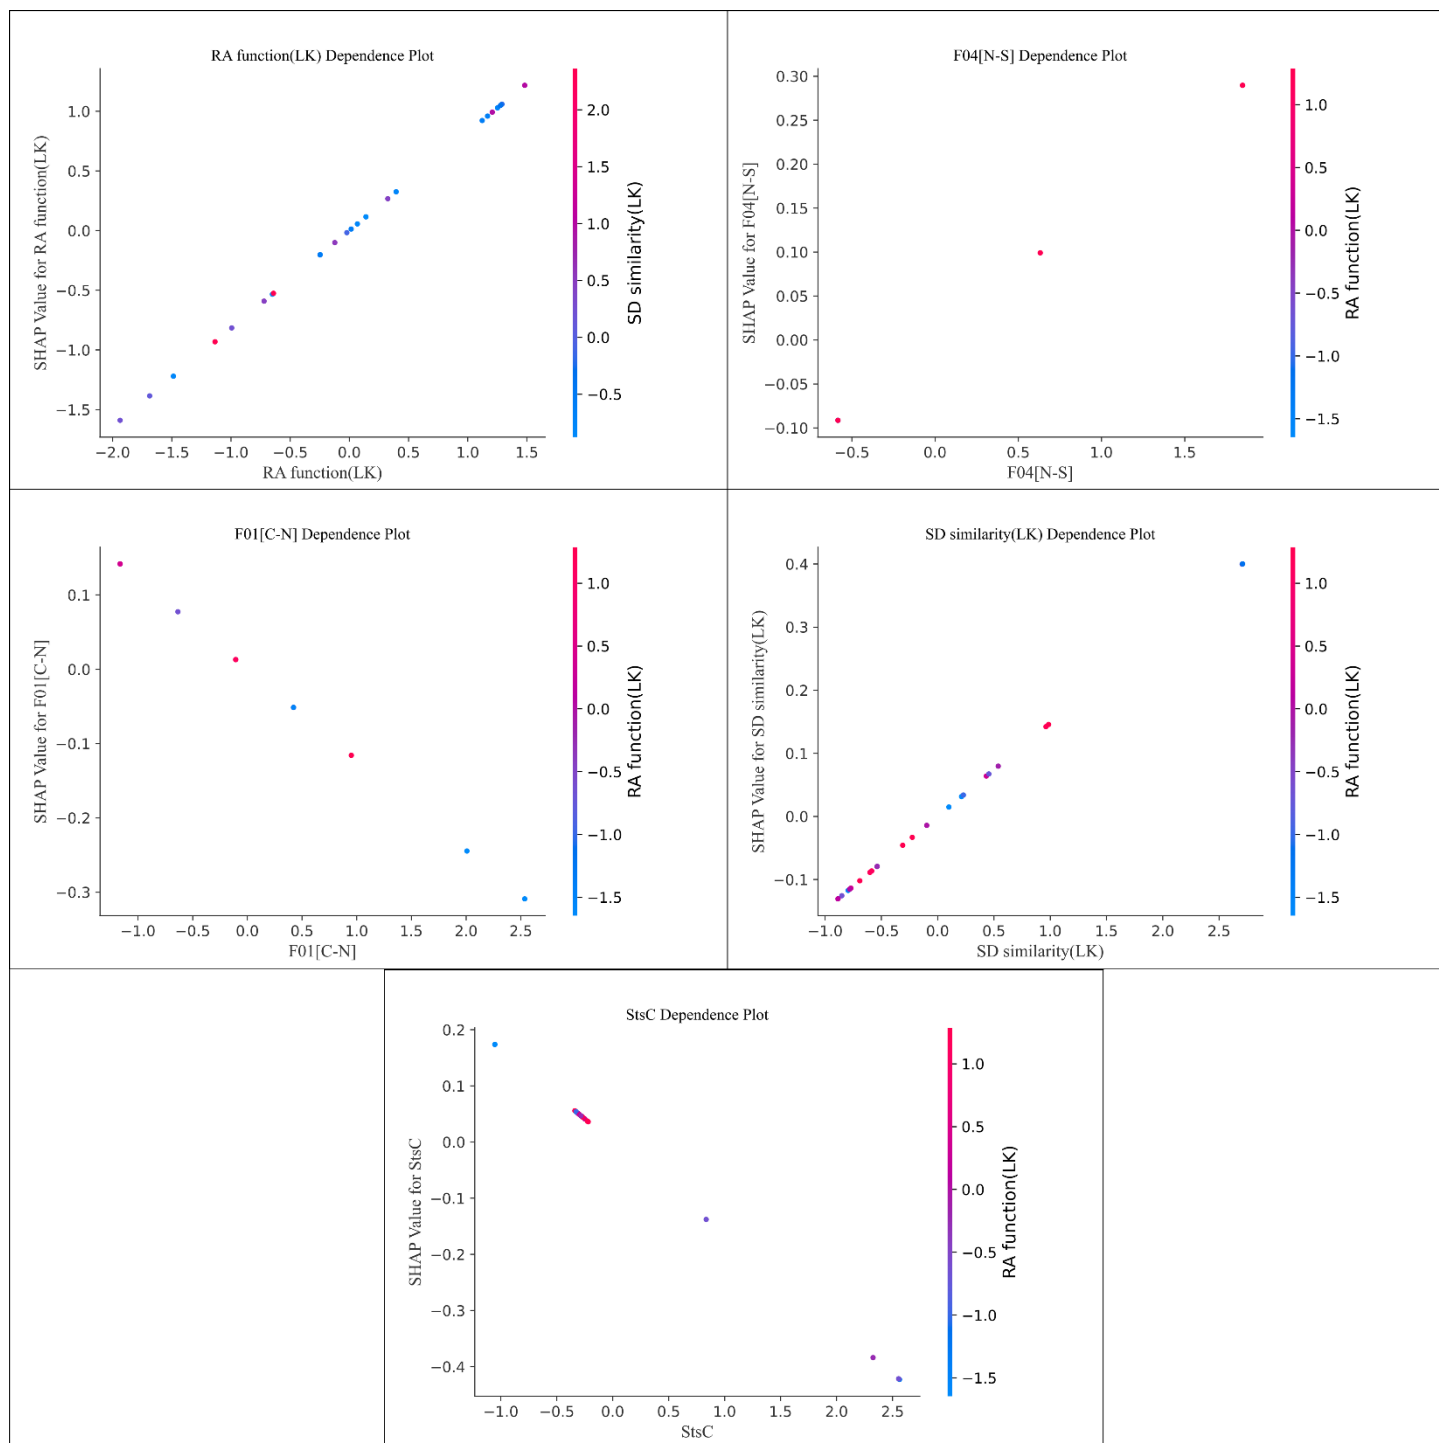

Fig. S22. SHAP dependence plot of the XGBoost model for the Diphenylamine Dataset. In this plot, the feature value is represented along the x axis and the corresponding shap values are represented along the y-axis. Interaction with other descriptors is represented through the color gradient.

## Ridge Regression:

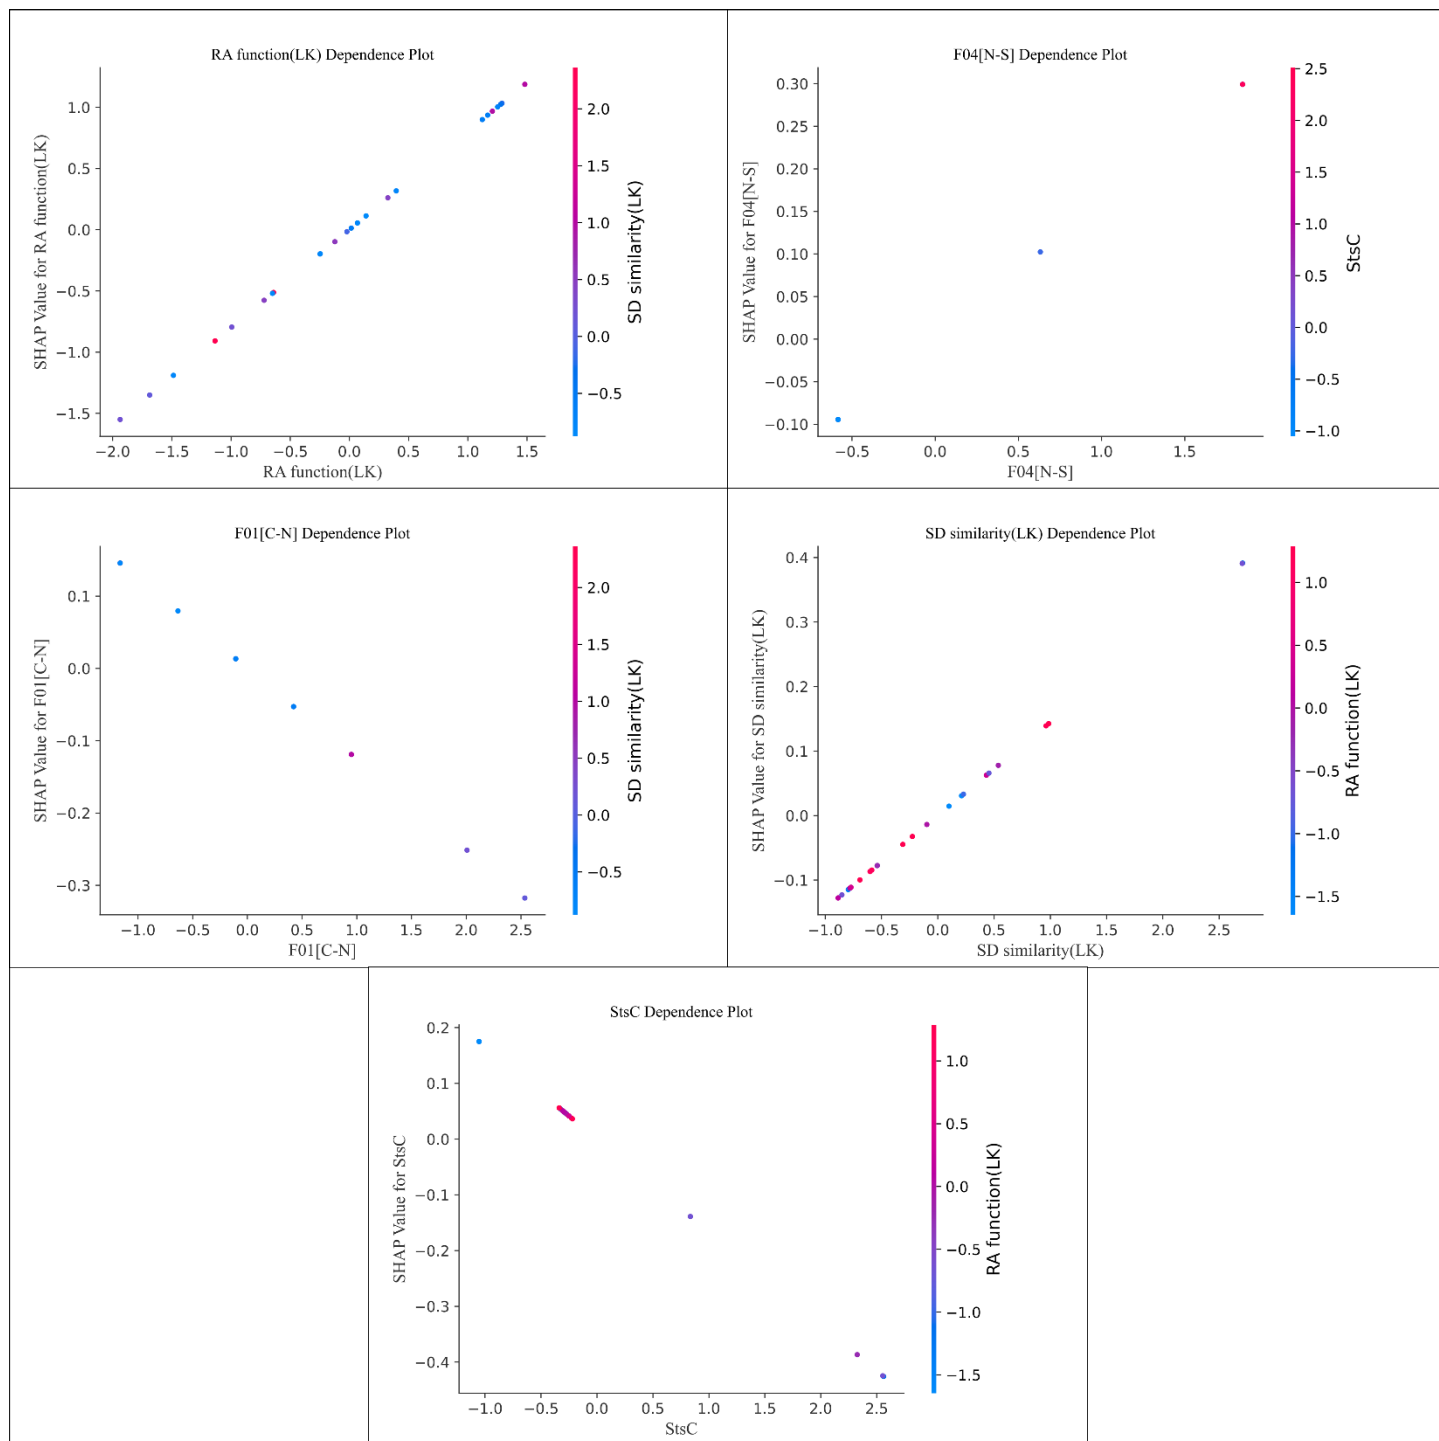

Fig. S23. SHAP dependence plot of the Ridge Regression model for the Diphenylamine Dataset. In this plot, the feature value is represented along the x axis and the corresponding shap values are represented along the y-axis. Interaction with other descriptors is represented through the color gradient.



PLS:

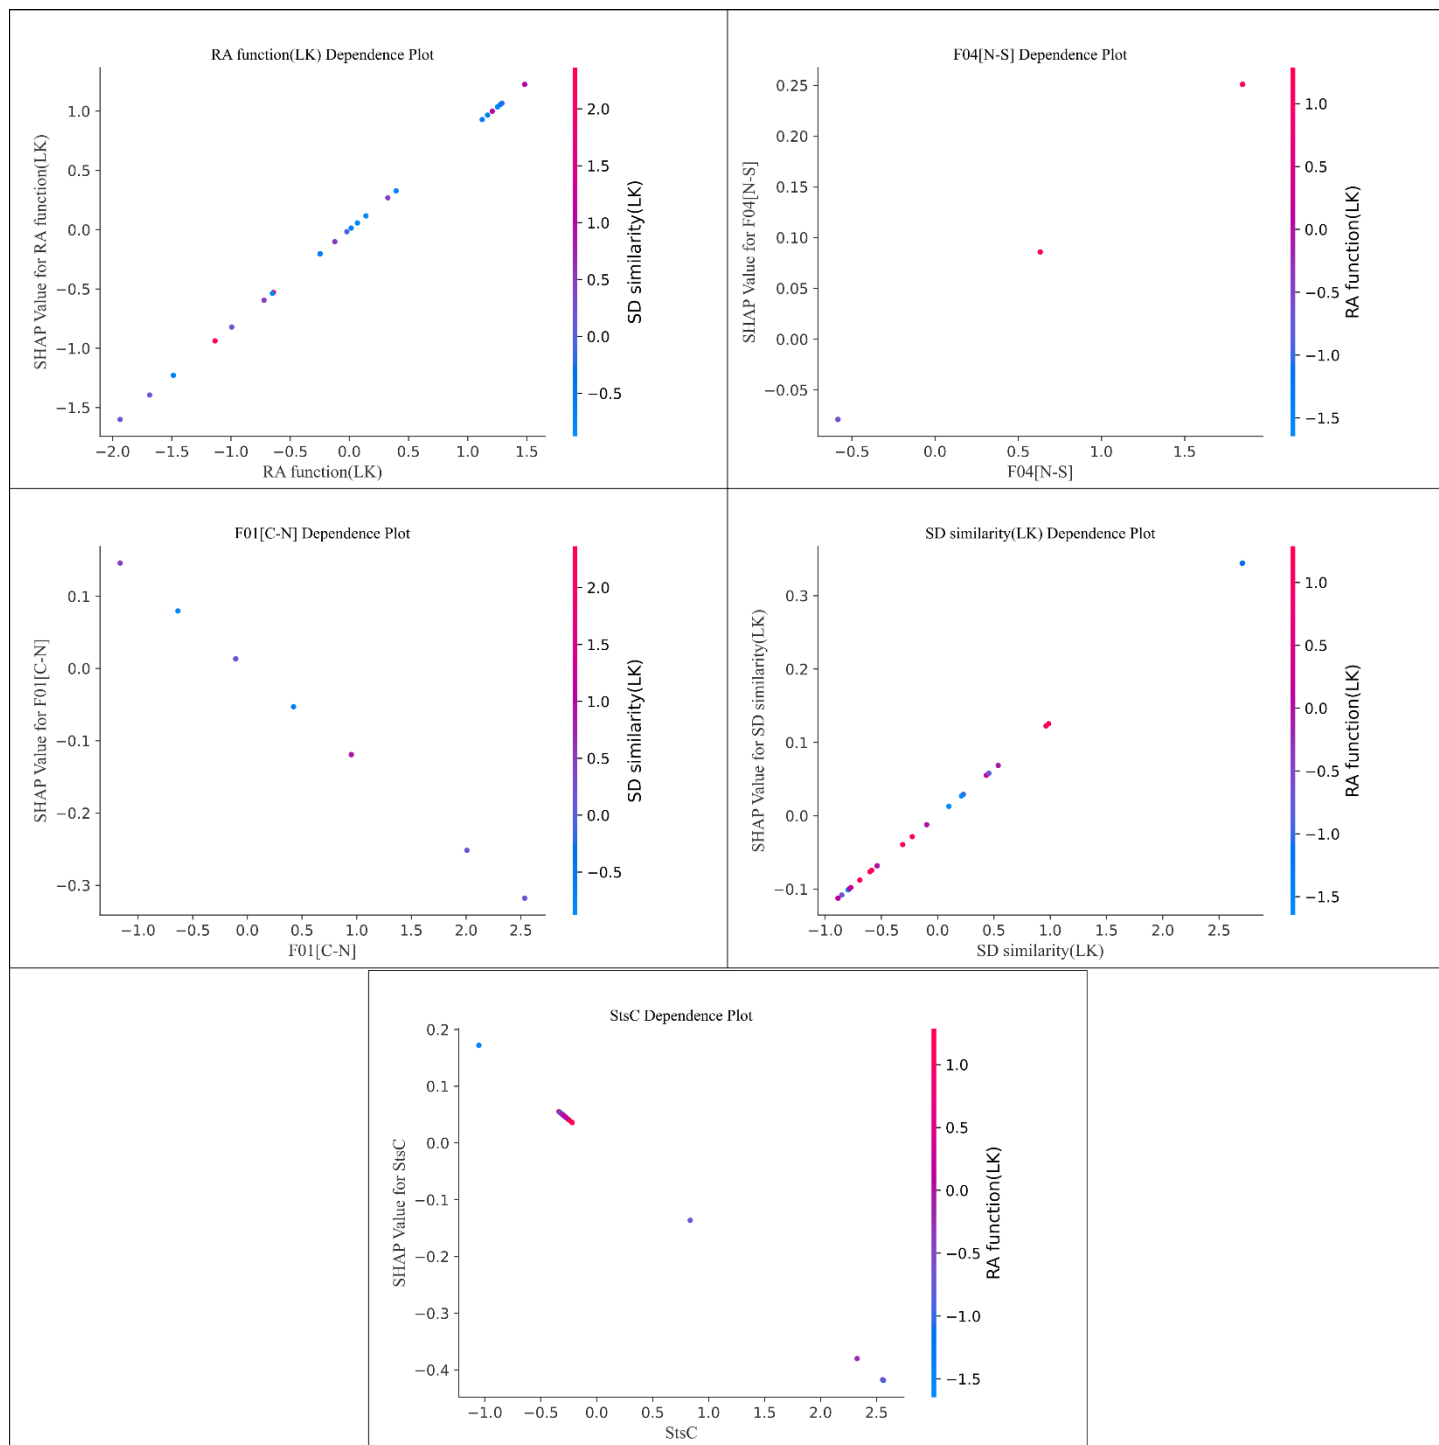

Fig. S24. SHAP dependence plot of the PLS model for the Diphenylamine Dataset. In this plot, the feature value is represented along the x axis and the corresponding shap values are represented along the y-axis. Interaction with other descriptors is represented through the color gradient.

**Table S1. List of designed dyes and their predicted PCE values**

| Compounds         | Structure                                                                          | Predicted PCE Values |                     |         | SA Score |
|-------------------|------------------------------------------------------------------------------------|----------------------|---------------------|---------|----------|
|                   |                                                                                    | PLS                  | Ridge<br>Regression | XGBoost |          |
| <b>Carbazoles</b> |                                                                                    |                      |                     |         |          |
| NCA1              | 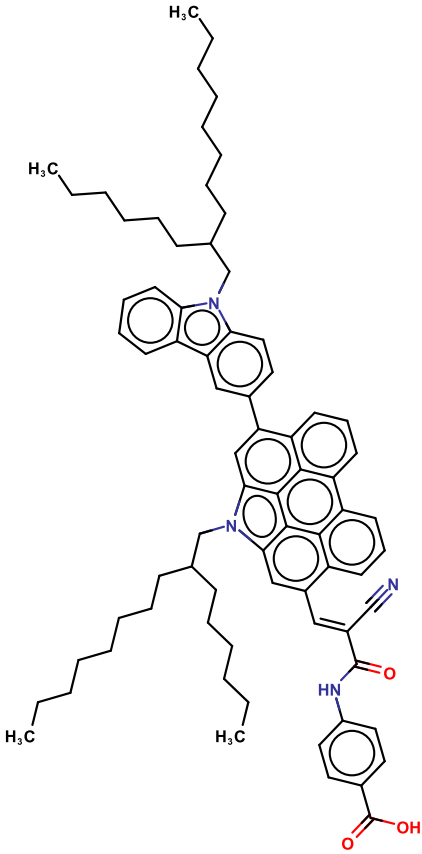 | 14.15                | 14.02               | 13.97   | 8.93     |

NCA2

15.22

15.09

15.06

9.55

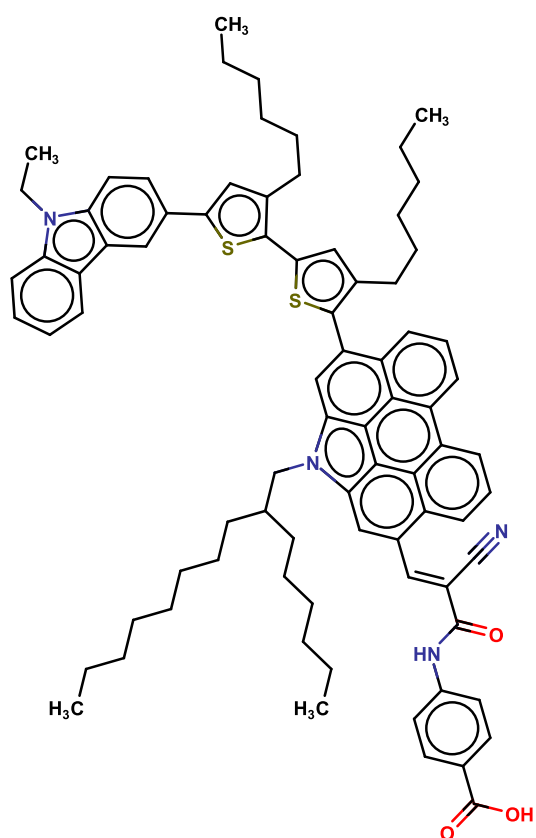

NCA3

15.79

15.73

15.69

10

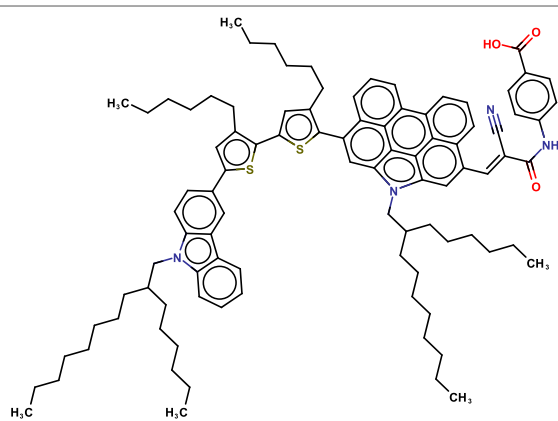

NCA4

18.18

18.33

18.24

9.61

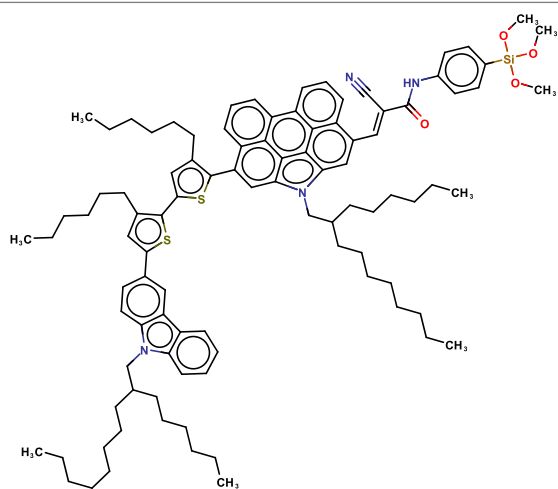



---

**NCO2**

5.67

5.1

5.67

5.09

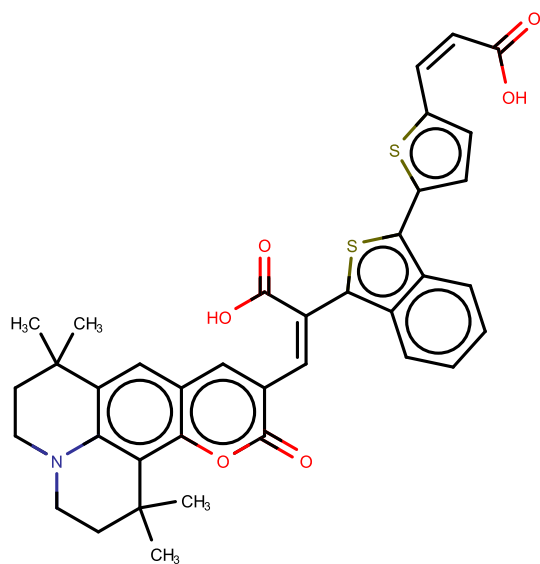

---

**NCO3**

6.74

6.03

6.74

5.21

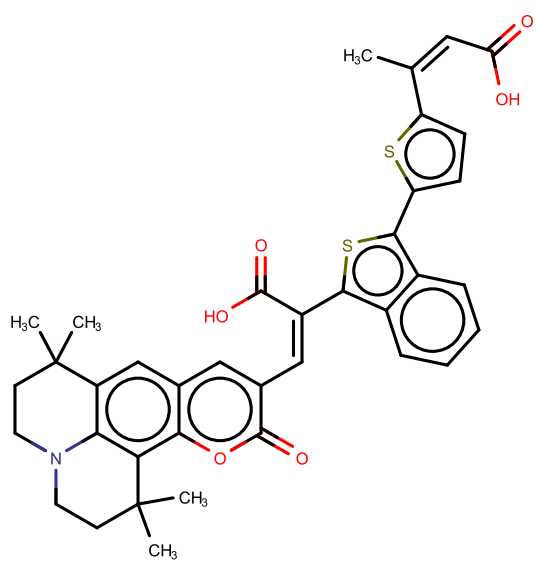

---

**NCO4**

6.74

6.03

6.74

5.21

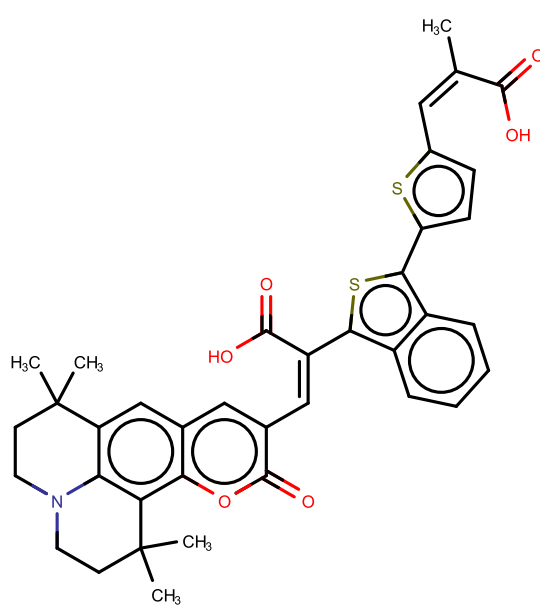

NC05

6.6

5.94

6.6

4.74

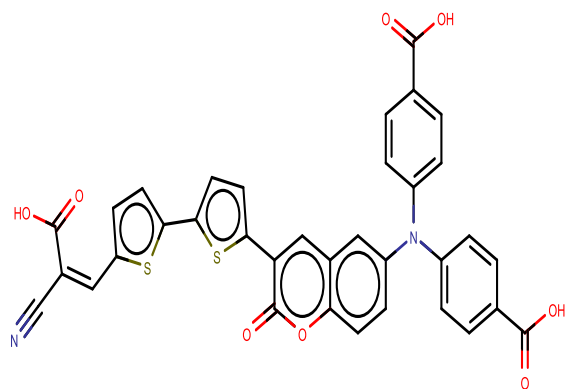

Diphenylamines

NDI1

7.06

7.05

7.1

4.86

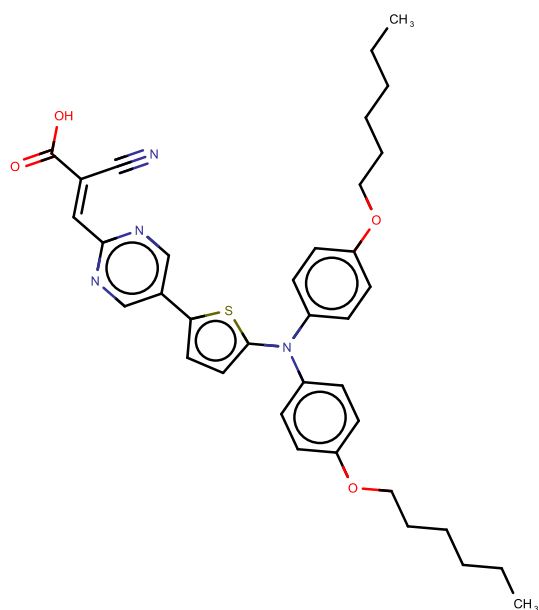

NDI2

6.41

6.33

6.4

6.44

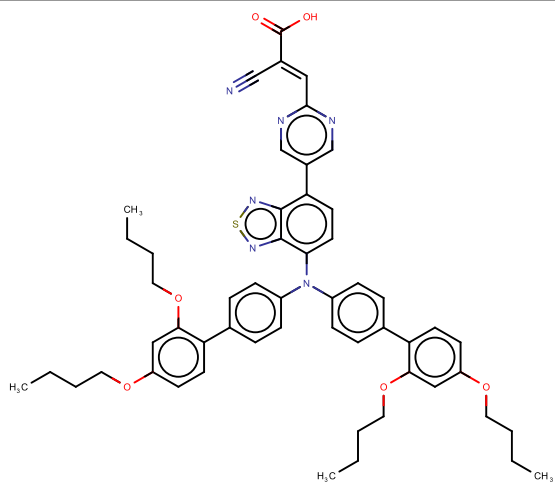

**NDI3**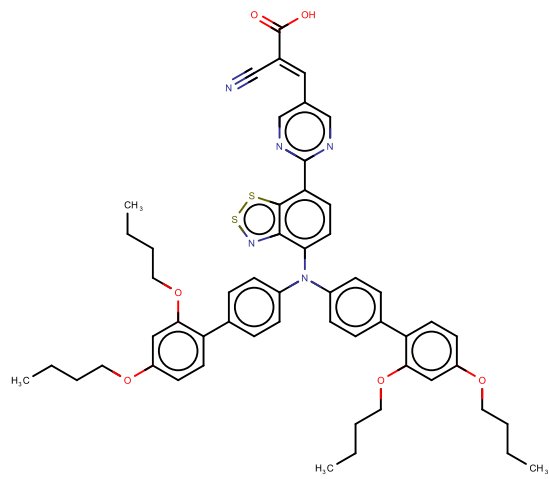

7.62

7.75

7.77

7.8

**NDI4**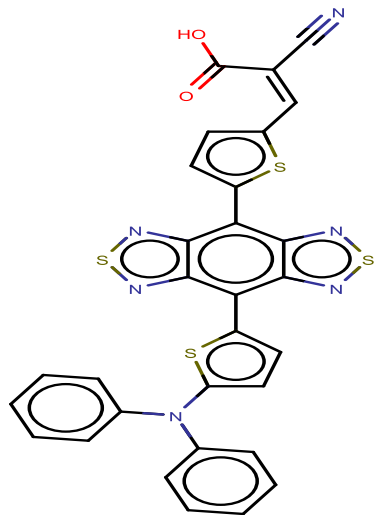

7.07

7.22

7.22

4.2

**NDI5**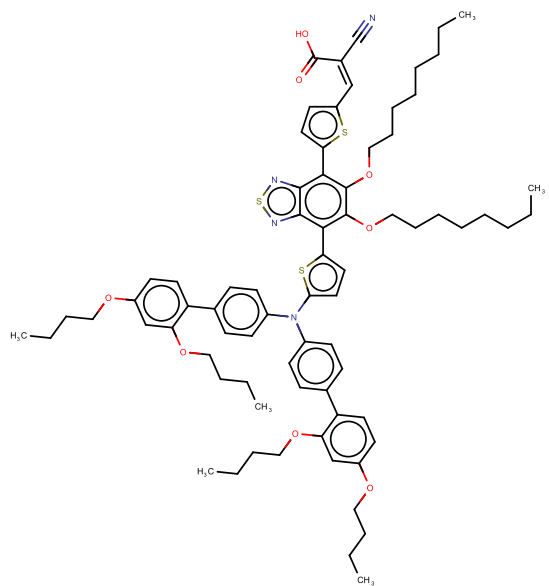

7.16

7.16

7.19

9.42

---

**Indolines**

**NIN1**

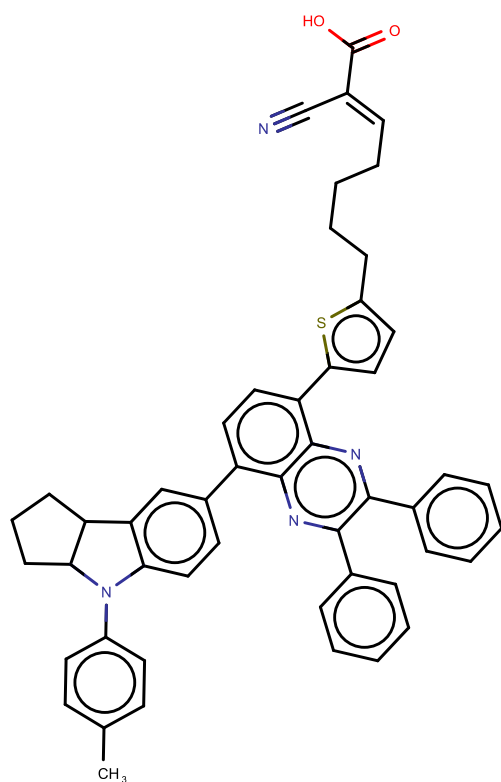

6.39

6.34

6.36

6.25

---

**NIN2**

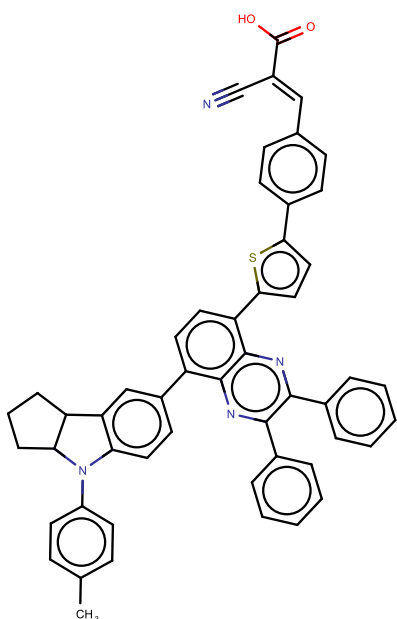

6.39

6.34

6.36

6.14



|             |  |      |      |      |      |
|-------------|--|------|------|------|------|
| <b>NIN3</b> |  | 8.22 | 8.15 | 8.19 | 6.58 |
| <b>NIN4</b> |  | 8.29 | 8.2  | 8.23 | 7.54 |
| <b>NIN5</b> |  | 8.49 | 8.41 | 8.45 | 7.71 |

**SA Score: Synthetic Accessibility score**
