# Supplementary material for: Machine learning-based q-RASPR modeling of power conversion efficiency of organic dyes in dye-sensitized solar cells
Source: Royal Society of Chemistry journal article supplement (doi:10.1039/d3se00457k), 2023-01-01
Supplement: d3se00457k3.xlsx [file d3se00457k3.xlsx]

## Sheet: Title sheet
Machine Learning - Based q-RASPR Modeling of Power Conversion Efficiency of Organic Dyes in Dye-Sensitized Solar Cells
Souvik Pore, Arkaprava Banerjee, Kunal Roy*
Drug Theoretics and Chemoinformatics Laboratory,
Department of Pharmaceutical Technology, Jadavpur University,
188 Raja S C Mullick Road, 700032, Kolkata, India
Supplementary Materials SI-2
*Corresponding author
Prof. Kunal Roy, Phone: +91 9831594140; Fax: +91-33-2837-1078;
Email: kunalroy_in@yahoo.com; kunal.roy@jadavpuruniversity.in

## Sheet: Coumarins
Coumarin Dye					Training Set											Test Set
ID	SMILES	PCE			ID	SD Activity(GK)	MaxPos(GK)	nRCN	nThiophenes	nRC-	nR=Ct	T(S..S)	C-040	PCE		ID	SD Activity(GK)	MaxPos(GK)	nRCN	nThiophenes	nRC-	nR=Ct	T(S..S)	C-040	PCE
1	CCN([C@@H]1C=Cc2c(C1)oc(=O)c(c2)c1ccc(cc1)c1ccc(s1)/C=C(/[C@H]1SC(=S)N(C1=O)CC(=O)O)\[C@H]1SC(=S)N(C1=O)CC(=O)O)CC	1.39			1	1.58171	0.000325755	0	1	0	3	52	5	1.39		4	0.942323	1	1	0	0	2	0	3	2.8
2	CCN(c1ccc2c(c1)oc(=O)c(c2)c1ccc(cc1)c1ccc(s1)C/C=C(\C(=O)O)/C#N)CC	3.62			2	0.958521	0.964175	1	1	0	2	0	3	3.62		5	1.43525	0.119467	0	0	0	2	28	4	1.41
3	CCN(c1ccc2c(c1)oc(=O)c(c2)c1ccc(cc1)c1ccc(cc1)/C=C(\[C@H]1SC(=S)N(C1=O)CC(=O)O)/[C@H]1SC(=S)N(C1=O)CC(=O)O)CC	1.77			3	0.972792	0.0435607	0	0	0	2	28	5	1.77		8	1.08167	0.246227	0	0	0	1	0	2	0.6
4	CCN(c1ccc2c(c1)oc(=O)c(c2)c1ccc(cc1)c1ccc(cc1)/C=C(/C(=O)O)\C#N)CC	2.8			6	0.762242	1	1	0	0	2	0	3	2.6		13	1.06027	1	1	0	0	2	0	3	4.7
5	CCN(c1ccc2c(c1)oc(=O)c(c2)c1ccc(cc1)/C=C(\[C@H]1SC(=S)N(C1=O)C(=O)O)/[C@H]1SC(=S)N(C1=O)CC(=O)O)CC	1.41			7	1.04559	0.234393	0	0	0	1	0	2	1.1		18	1.3036	1	1	1	0	2	0	3	5.8
6	CCN(c1ccc2c(c1)oc(=O)c(c2)c1ccc(cc1)/C=C(\C(=O)O)/C#N)CC	2.6			9	1.15892	0.366843	0	0	0	1	2	3	2.6		30	1.37109	0.815464	1	2	0	2	3	3	3.73
7	OC(=O)C[n+]1c(/C=C/c2cc3cc4c5c(c3oc2=O)C(C)(C)CCN5CCC4(C)C)sc2c1cccc2	1.1			10	1.19467	0.525012	0	0	0	2	0	3	3.7		40	1.16449	1	1	2	0	2	3	3	4.59
8	OC(=O)c1ccc2c(c1)C(C)(C)C(=[N+]2C)/C=C/c1cc2cc3c4c(c2oc1=O)C(C)(C)CCN4CCC3(C)C	0.6			11	1.05847	0.761178	1	0	0	2	0	3	3.5		41	1.3036	1	1	1	0	2	0	3	6.24
9	OC(=O)CN1C(=S)S/C(=C/c2cc3cc4c5c(c3oc2=O)C(C)(C)CCN5CCC4(C)C)/C1=O	2.6			12	1.02567	0.761178	1	0	0	2	0	3	5.2		42	0.923608	0.00639723	0	0	0	0	0	2	1.03
10	OC(=O)C(=C/C=C/c1cc2cc3c4c(c2oc1=O)C(C)(C)CCN4CCC3(C)C)C(=O)O	3.7			14	0.922928	0.656474	1	0	0	3	0	3	3.1		43	1.3036	1	1	1	0	2	0	3	3.36
11	N#C/C(=C/C=C/C=C/c1cc2cc3c4c(c2oc1=O)C(C)(C)CCN4CCC3(C)C)/C(=O)O	3.5			15	1.00617	1	1	0	0	2	0	3	4.1		48	0.942323	1	1	0	0	2	0	3	3.5
12	N#C/C(=C/C=C/c1cc2cc3c4c(c2oc1=O)C(C)(C)CCN4CCC3(C)C)/C(=O)O	5.2			16	0.979021	0.263611	0	0	0	1	0	2	3.4		49	0.96853	0.049518	0	0	0	1	0	1	0.72
13	CCN(c1ccc2c(c1)oc(=O)c(c2)/C=C/C=C(\C(=O)O)/C#N)CC	4.7			17	0.986462	0.200655	0	0	0	1	0	2	0.9		51	1.16449	1	1	2	0	2	3	3	5.06
14	N#C/C(=C\c1c(=O)oc2c(c1C(F)(F)F)cc1c3c2C(C)(C)CCN3CCC1(C)C)/C(=O)O	3.1			19	1.17902	1	1	2	0	2	3	3	7.4		53	1.53386	0.0593797	1	0	2	3	0	3	2.21
15	N#C/C(=C/c1cc2cc3c4c(c2oc1=O)C(C)(C)CCN4CCC3(C)C)/C(=O)O	4.1			20	1.39371	1	1	3	0	2	12	3	6.4
16	OC(=O)/C=C/c1cc2cc3c4c(c2oc1=O)C(C)(C)CCN4CCC3(C)C	3.4			21	1.40204	0.986952	1	1	0	2	3	3	4.78
17	OC(=O)c1cc2cc3CCCN4c3c(c2oc1=O)CCC4	0.9			22	2.16542	0.00349873	0	1	0	1	31	3	0.33
18	N#C/C(=C\c1ccc(s1)c1cc2cc3c4c(c2oc1=O)C(C)(C)CCN4CCC3(C)C)/C(=O)O	5.8			23	0.958521	0.964175	1	1	0	2	0	3	3.62
19	N#C/C(=C/c1ccc(s1)c1ccc(s1)c1cc2cc3c4c(c2oc1=O)C(C)(C)CCN4CCC3(C)C)/C(=O)O	7.4			24	1.02261	0.200655	0	0	0	1	0	2	1.04
20	N#C/C(=C/c1ccc(s1)c1ccc(s1)c1ccc(s1)c1cc2cc3c4c(c2oc1=O)C(C)(C)CCN4CCC3(C)C)/C(=O)O	6.4			25	1.12097	0.200655	0	0	0	1	0	2	2.33
21	CCN(c1ccc2c(c1)oc(=O)c(c2)c1csc(n1)c1ccc(s1)C=C(C(=O)O)C#N)CC	4.78			26	1.08066	0.200655	0	0	0	1	0	2	2.69
22	CCN(c1ccc2c(c1)oc(=O)c(c2)c1csc(n1)c1ccc(s1)/C=C\1/SC(=S)N(C1=O)CC(=O)O)CC	0.33			27	0.942594	1	1	1	0	2	5	3	4.82
23	CCN(c1ccc2c(c1)oc(=O)c(c2)c1ccc(cc1)c1ccc(s1)C=C(C(=O)O)C#N)CC	3.62			28	0.98013	1	1	1	0	2	5	3	3.93
24	OC(=O)c1ccc(cc1)c1ccccc1c1cc2cc3c4c(c2oc1=O)C(C)(C)CCN4CCC3(C)C	1.04			29	1.53777	1	1	2	0	2	3	3	6.07
25	OC(=O)c1ccc(cc1)c1cccc(c1)c1cc2cc3c4c(c2oc1=O)C(C)(C)CCN4CCC3(C)C	2.33			31	1.16277	1	1	3	0	2	12	3	4.37
26	OC(=O)c1ccc(cc1)c1ccc(cc1)c1cc2cc3c4c(c2oc1=O)C(C)(C)CCN4CCC3(C)C	2.69			32	1.26153	0.262077	2	2	0	3	3	4	6.5
27	N#C/C(=C\c1ccc(s1)c1ccc(c2c1nsn2)c1cc2cc3c4c(c2oc1=O)C(C)(C)CCN4CCC3(C)C)/C(=O)O	4.82			33	0.858465	0.733909	1	1	0	2	0	3	5.8
28	N#C/C(=C\c1sc(c2c1OCCO2)c1ccc(c2c1nsn2)c1cc2cc3c4c(c2oc1=O)C(C)(C)CCN4CCC3(C)C)/C(=O)O	3.93			34	1.23593	0.263611	2	1	0	3	0	4	5.3
29	N#C/C(=C\c1sc(c2c1OCCO2)c1ccc(s1)c1cc2cc3c4c(c2oc1=O)C(C)(C)CCN4CCC3(C)C)/C(=O)O	6.07			35	1.12831	0.14137	1	0	0	4	0	3	6.2
30	N#C/C(=C\c1ccc(cc1)c1sc(c2c1OCCO2)c1ccc(s1)c1cc2cc3c4c(c2oc1=O)C(C)(C)CCN4CCC3(C)C)/C(=O)O	3.73			36	1.40648	0.606388	1	2	0	2	5	3	5.5
31	N#C/C(=C\c1ccc(s1)c1sc(c2c1OCCO2)c1ccc(s1)c1cc2cc3c4c(c2oc1=O)C(C)(C)CCN4CCC3(C)C)/C(=O)O	4.37			37	1.39407	0.821177	1	1	0	2	0	3	5.53
32	N#C/C(=C/c1ccc(s1)c1ccc(s1)/C(=C/c1cc2cc3c4c(c2oc1=O)C(C)(C)CCN4CCC3(C)C)/C#N)/C(=O)O	6.5			38	1.33994	1	1	1	0	2	0	3	4.02
33	N#C/C(=C\c1ccc(s1)/C=C/c1cc2cc3c4c(c2oc1=O)C(C)(C)CCN4CCC3(C)C)/C(=O)O	5.8			39	0.969987	1	1	1	0	2	0	3	2.74
34	N#C/C(=C\c1ccc(s1)/C(=C/c1cc2cc3c4c(c2oc1=O)C(C)(C)CCN4CCC3(C)C)/C#N)/C(=O)O	5.3			44	3.57971	0.00141068	1	2	2	2	21	3	1.35
35	N#C/C(=C\1/C=C(/C=C/c2cc3cc4c5c(c3oc2=O)C(C)(C)CCN5CCC4(C)C)CC(C1)(C)C)/C(=O)O	6.2			46	0.859094	1	1	0	0	2	0	3	5.2
36	N#C/C(=C/c1ccc(s1)/C=C/c1ccc(s1)c1cc2cc3c4c(c2oc1=O)C(C)(C)CCN4CCC3(C)C)/C(=O)O	5.5			47	1.00617	1	1	0	0	2	0	3	4.1
37	CCCCn1c2ccc(cc2c2c1cccc2)c1cc(c(s1)c1cc2cc3c4c(c2oc1=O)C(C)(C)CCN4CCC3(C)C)/C=C(\C(=O)O)/C#N	5.53			50	1.40075	1	1	1	0	2	0	3	4.7
38	CCCCC1(CCCC)c2ccccc2c2c1cc(cc2)c1cc(c(s1)c1cc2cc3C(C)(C)CCN4c3c(c2oc1=O)C(C)(C)CC4)/C=C(/C(=O)O)\C#N	4.02			52	1.32392	1	1	1	0	2	0	3	5.94
39	N#C/C(=C/c1cc(sc1c1cc2cc3c4c(c2oc1=O)C(C)(C)CCN4CCC3(C)C)C)/C(=O)O	2.74			54	1.12386	0.0884054	0	3	0	2	16	1	3.5
40	N#C/C(=C\c1ccc(s1)c1ccc(s1)c1cc2ccc(cc2oc1=O)N(c1ccccc1)c1ccccc1)/C(=O)O	4.59			55	1.94526	0.0142278	1	0	2	2	0	3	2
41	N#C/C(=C\c1ccc(cc1)c1ccc(s1)c1cc2ccc(cc2oc1=O)N(c1ccccc1)c1ccccc1)/C(=O)O	6.24			56	1.41256	0.0142278	1	0	2	2	0	3	0.99
42	CCN(c1ccc2c(c1)OC(=O)[C@H](C2)C(=O)O)CC	1.03			57	1.04859	0.11973	1	0	0	2	0	3	1.37
43	N#C/C(=C\c1ccc(s1)c1cc2ccc(cc2oc1=O)N(c1ccccc1)c1ccccc1)/C(=O)O	3.36
44	N#C/C(=C/c1ccc(s1)c1ccc(c2c1nsn2)C#Cc1ccc(s1)c1cc2cc3c4c(c2oc1=O)C(C)(C)CCN4CCC3(C)C)/C(=O)O	1.35
46	CCN(c1ccc2c(c1)oc(=O)c(c2)c1ccc(c(c1)F)/C=C(\C(=O)O)/C#N)CC	5.2
47	CCN(c1ccc2c(c1)oc(=O)c(c2)c1ccc(c(c1)Cl)/C=C(\C(=O)O)/C#N)CC	4.1
48	CCN(c1ccc2c(c1)oc(=O)c(c2)c1ccc(c(c1)Br)/C=C(\C(=O)O)/C#N)CC	3.5
49	CCO[Si](c1ccc2c(c1)nc(o2)c1cc2ccc(cc2oc1=O)N(CC)CC)(OCC)OCC	0.72
50	N#CC(=Cc1ccc(s1)c1cc2ccc(cc2oc1=O)N(c1ccc2c(c1)Cc1c2cccc1)c1ccc2c(c1)Cc1c2cccc1)C(=O)O	4.7
51	N#CC(=Cc1ccc(s1)c1ccc(s1)c1cc2ccc(cc2oc1=O)N(c1ccc2c(c1)Cc1c2cccc1)c1ccc2c(c1)Cc1c2cccc1)C(=O)O	5.06
52	N#CC(=Cc1ccc(cc1)c1ccc(s1)c1cc2ccc(cc2oc1=O)N(c1ccc2c(c1)Cc1c2cccc1)c1ccc2c(c1)Cc1c2cccc1)C(=O)O	5.94
53	CCN(c1ccc2c(c1)oc(=O)c(c2C)C#CC=C(C(=O)O)C#N)CC	2.21
54	CCCCCCc1cc(sc1c1sc(c(c1)CCCCCC)/C=C/c1ccc(s1)[Si](OCC)(OCC)OCC)c1c(=O)oc2c(c1C)ccc(c2)N(CC)CC	3.5
55	CCCCCCCCCCOc1cc2cc(C#Cc3ccc(cc3)/C=C(/C(=O)O)\C#N)c(=O)oc2cc1OCCCCCCCCCC	2
56	N#CC(=Cc1ccc(cc1)C#Cc1cc2cc(OC)c(cc2oc1=O)OC)C(=O)O	0.99
57	N#CC(=Cc1ccc(cc1)/C=C/c1ccc(cc1)/C=C/c1cc2cc(OC)c(cc2oc1=O)OC)C(=O)O	1.37

## Sheet: Carbazoles
Carbazole Dye					Training Set											Test Set
ID	SMILES	PCE			ID	Avg.Sim(GK)	F06[N-N]	nR10	F04[C-N]	B04[N-O]	N%	F06[N-O]	B02[C-S]	PCE		ID	Avg.Sim(GK)	F06[N-N]	nR10	F04[C-N]	B04[N-O]	N%	F06[N-O]	B02[C-S]	PCE
1	N#C/C(=C\c1ccc(s1)c1ccc(s1)c1ccc(cc1)n1c2ccc(cc2c2c1ccc(c2)C(C)(C)C)C(C)(C)C)/C(=O)O	2.48			2	0.93422	0	0	4	1	2.8169	0	1	2.39		1	0.948373	0	0	4	1	2.5641	0	1	2.48
2	N#C/C(=C/c1ccc(s1)c1ccc(cc1)n1c2ccc(cc2c2c1ccc(c2)C(C)(C)C)C(C)(C)C)/C(=O)O	2.39			3	0.733506	0	1	5	1	2.63158	0	1	3.96		10	0.960799	0	0	3	1	1.26582	0	1	4.7
3	N#C/C(=C\c1ccc(s1)c1ccc(s1)c1ccc2c(c1)n1c3ccc(cc3c3c1c2cc(c3)C(C)(C)C)C(C)(C)C)/C(=O)O	3.96			4	0.66978	0	1	5	1	1.78571	0	1	2.85		21	0.387252	1	0	12	1	6.89655	0	1	1.53
4	CCCCCCc1cc(sc1c1sc(c(c1)CCCCCC)/C=C(/C(=O)O)\C#N)c1ccc2c(c1)n1c3ccc(cc3c3c1c2cc(c3)C(C)(C)C)C(C)(C)C	2.85			5	0.944098	0	0	5	1	3.125	0	1	5.02		22	0.44424	1	0	12	1	4.81928	0	1	1.2
5	N#CC(=Cc1ccc(s1)c1ccc2c(c1)c1ccccc1n2c1ccc2c(c1)C(C)(C)c1c2cccc1)C(=O)O	5.02			6	0.897005	0	0	5	1	2.8169	0	1	5.15		23	0.943633	0	0	4	1	3.125	0	0	1.65
6	N#CC(=Cc1ccc(s1)c1ccc(s1)c1ccc2c(c1)c1ccccc1n2c1ccc2c(c1)C(C)(C)c1c2cccc1)C(=O)O	5.15			7	0.923831	0	0	4	1	2.8169	0	1	3.87		24	0.911248	0	0	4	1	5	0	0	2.81
7	N#CC(=Cc1ccc(s1)c1ccc2c(c1)c1ccccc1n2c1ccc(cc1)C=C(c1ccccc1)c1ccccc1)C(=O)O	3.87			8	0.869177	0	0	5	1	2.66667	0	1	3.76		31	0.648065	0	0	13	1	4.90196	0	0	3.23
8	N#CC(=Cc1ccc(s1)C=Cc1ccc(s1)c1ccc2c(c1)c1ccccc1n2c1ccc2c(c1)C(C)(C)c1c2cccc1)C(=O)O	3.76			9	0.969747	0	0	3	1	1.50376	0	1	4.8		38	0.722239	0	0	10	1	2.64901	0	1	4.62
9	CCCCCCCOc1ccc2c(c1)n(CC)c1c2cc(cc1)c1sc(c(c1)CCCCCC)c1sc(c(c1)CCCCCC)c1sc(c(c1)CCCCCC)/C=C(\C(=O)O)/C#N	4.8			11	0.980609	0	0	3	1	1.47059	0	1	5		49	0.399423	0	0	22	1	4.13223	0	1	8.07
10	CCCCCCCOc1ccc2c(c1)n(CC)c1c2cc(cc1)c1sc(c(c1)CCCCCC)c1sc(c(c1)CCCCCC)c1sc(c(c1)CCCCCC)c1sc(c(c1)CCCCCC)/C=C(\C(=O)O)/C#N	4.7			12	0.404313	0	0	5	0	2.8169	0	1	1.79		51	0.95726	0	0	4	1	3.50877	0	0	4.5
11	CCCCCCc1cc(sc1c1sc(c(c1)CCCCCC)c1sc(c(c1)CCCCCC)/C=C(/C(=O)O)\C#N)c1sc(cc1CCCCCC)c1ccc2c(c1)c1ccccc1n2CC	5			13	0.371107	0	0	5	0	2.5641	0	1	0.55		58	0.98766	0	0	3	1	1.47059	0	1	7.7
12	OC(=O)CN1C(=S)SC(=Cc2ccc(s2)c2ccc3c(c2)c2ccccc2n3c2ccc3c(c2)C(C)(C)c2c3cccc2)C1=O	1.79			14	0.899719	0	0	3	1	2.32558	0	1	5.1		59	0.756393	0	0	3	1	3.50877	0	1	4.8
13	OC(=O)CN1C(=S)SC(=Cc2ccc(s2)c2ccc(s2)c2ccc3c(c2)c2ccccc2n3c2ccc3c(c2)C(C)(C)c2c3cccc2)C1=O	0.55			15	0.950757	0	0	4	1	2.22222	0	1	5.3		61	0.788	0	0	5	1	2.98507	0	0	2.35
14	CCCCCCc1cc(sc1c1sc(c(c1)CCCCCC)C=C(C(=O)O)C#N)c1ccc2c(c1)c1ccccc1n2CC	5.1			16	0.961198	0	0	4	1	2.12766	0	1	5.4		64	0.640121	0	0	10	1	3.27869	0	0	2.14
15	CCCCCCc1cc(sc1c1cc(c(s1)C=C(C(=O)O)C#N)CCCCCC)c1ccc2c(c1)c1ccccc1n2c1ccccc1	5.3			17	0.788377	0	0	11	1	6.89655	0	1	1.56		68	0.495451	0	0	4	1	3.1746	0	1	2.52
16	CCCCCCc1cc(sc1c1cc(c(s1)C=C(C(=O)O)C#N)CCCCCC)c1ccc2c(c1)c1ccccc1n2c1ccc(cc1)OC	5.4			18	0.79565	0	0	11	1	6.89655	0	1	3.29		70	0.972925	0	0	4	1	3.57143	0	0	1.87
17	N#CC(=Cc1ccc(s1)c1ccc(c2c1nsn2)c1ccc(cc1)n1c2ccccc2c2c1cccc2)C(=O)O	1.56			19	0.845903	0	0	12	1	5.55556	0	1	3.8		71	0.75746	0	0	12	1	5.33333	0	1	4.35
18	N#CC(=Cc1ccc(s1)c1ccc(c2c1nsn2)c1ccc2c(c1)c1ccccc1n2c1ccccc1)C(=O)O	3.29			20	0.837296	0	0	11	1	4.81928	0	1	2.36		72	0.75746	0	0	12	1	5.33333	0	1	4.96
19	CCCCC(Cn1c2ccc(cc2c2c1cccc2)c1ccc(c2c1nsn2)c1ccc(s1)C=C(C(=O)O)C#N)CC	3.8			25	0.204594	0	1	18	1	2.43902	0	1	4.63		73	0.72614	0	0	13	1	5.12821	0	1	4.05
20	CCCCC(COc1ccc(cc1)n1c2ccc(cc2c2c1cccc2)c1ccc(c2c1nsn2)c1ccc(s1)C=C(C(=O)O)C#N)CC	2.36			26	0.378142	0	0	12	1	2.83688	0	1	5.46		75	0.733052	0	0	5	1	4.65116	0	0	1.9
21	N#CC(=Cc1ccc(s1)c1ccc(c2c1nsn2)c1ccc2c(c1)n(c1ccccc1)c1c2cccc1)C(=O)O	1.53			27	0.290311	0	0	7	1	1.40187	0	1	5.34		78	0.877797	0	0	5	1	3.33333	0	1	4.22
22	CCCCC(COc1ccc(cc1)n1c2ccccc2c2c1cc(cc2)c1ccc(c2c1nsn2)c1ccc(s1)C=C(C(=O)O)C#N)CC	1.2			28	0.982195	0	0	3	1	1.44928	0	1	3.4		81	0.913497	0	0	6	1	2.29008	0	1	4.41
23	N#CC(=Cc1ccc(cc1)n1c2ccc(cc2c2c1ccc(c2)C(C)(C)C)C(C)(C)C)C(=O)O	1.65			29	0.866193	0	0	5	1	6	0	0	1.54		82	0.937633	0	0	6	1	2.5641	0	1	4.26
24	N#CC(=Cc1ccc(cc1)n1c2ccccc2c2c1cccc2)C(=O)O	2.81			30	0.600154	0	0	12	1	4.25532	0	0	2.54		83	0.918985	0	0	5	1	2.5	0	1	4.55
25	CCCCC(COc1c2c3sc(cc3sc2c2c(c1OCC(CCCC)CC)c1sc(cc1s2)/C=C(\C(=O)O)/C#N)c1ccc(c2c1nc(c1csc(c1)C)c(n2)c1ccc(s1)C)c1ccc2c(c1)c1ccccc1n2CC(CCCC)CC)CC	4.63			32	0.934817	0	0	4	1	3.84615	0	0	0.695		84	0.823469	0	0	5	1	3.06122	0	1	3.64
26	CCCCC(COc1c2c3sc(cc3sc2c2c(c1OCC(CCCC)CC)c1sc(cc1s2)/C=C(\C(=O)O)/C#N)c1ccc(c2c1nsn2)c1ccc2c(c1)c1ccccc1n2CC(CCCC)CC)CC	5.46			33	0.329163	0	0	5	1	1.53846	0	1	4.87		85	0.846419	0	0	5	1	3.57143	0	1	4.82
27	CCCCC(COc1c2c3sc(cc3sc2c2c(c1OCC(CCCC)CC)c1sc(cc1s2)/C=C(\C(=O)O)/C#N)c1ccc2c(c1)n(CC(CCCC)CC)c1c2cc(cc1)c1sc2c(c1)sc1c2c(OCC(CCCC)CC)c(OCC(CCCC)CC)c2c1sc1c2sc(c1)/C=C(\C(=O)O)/C#N)CC	5.34			34	0.800996	0	0	8	1	2.5641	0	1	3.64		88	0.835252	0	0	6	1	4.30108	0	1	3.1
28	CCCCCCc1cc(sc1c1sc(c(c1)CCCCCC)c1sc(c(c1)CCCCCC)/C=C(/P(=O)(O)O)\C#N)c1sc(cc1CCCCCC)c1ccc2c(c1)c1ccccc1n2CC	3.4			35	0.913817	0	0	8	1	2.41935	0	1	4.8		90	0.959866	0	0	4	1	3.44828	0	0	1.94
29	CCCCn1c2ccc(cc2c2c1ccc(c2)/C=C(/C(=O)O)\C#N)/C=C(/C(=O)O)\C#N	1.54			36	0.934101	0	0	8	1	2.29008	0	1	5.69		93	0.847502	0	0	6	1	5	0	1	3.55
30	CCCCn1c2ccc(cc2c2c1ccc(c2)N(c1ccc(cc1)OC)c1ccccc1)N(c1ccc(cc1)/C=C(\C(=O)O)/C#N)c1ccc(cc1)OC	2.54			37	0.75976	0	0	8	1	2.23881	0	1	4.82		106	0.911248	0	0	4	1	5	0	0	1.77
31	CCCCn1c2ccc(cc2c2c1ccc(c2)N(c1ccc(cc1)/C=C(\C(=O)O)/C#N)c1ccc(cc1)OC)N(c1ccc(cc1)/C=C(\C(=O)O)/C#N)c1ccc(cc1)OC	3.23			39	0.766693	0	0	10	1	4.49438	0	1	4.3		107	0.787391	0	0	12	1	4.3956	0	1	4.86
32	N#CC(=Cc1ccc(cc1)C#Cc1ccc(cc1)n1c2ccccc2c2c1cccc2)C(=O)O	0.695			40	0.78707	0	0	4	1	2.66667	0	1	5.22		109	0.343324	0	0	4	1	4.54545	0	1	2.94
33	CCCCC(COc1c2c3sc(cc3sc2c2c(c1OCC(CCCC)CC)c1sc(cc1s2)/C=C(\C(=O)O)/C#N)c1ccc2c(c1)c1ccccc1n2CC(CCCC)CC)CC	4.87			41	0.969204	0	0	3	1	1.8018	0	1	3.9		111	0.139586	0	0	5	1	4.83871	0	0	0.54
34	CCCCCCCCCCCCn1c2ccc(cc2c2c1ccc(c2)c1ccc(s1)/C=C(/C(=O)O)\C#N)n1c2ccc(cc2c2c1ccc(c2)C(C)(C)C)C(C)(C)C	3.64			42	0.984326	0	0	3	1	1.5625	0	1	2.9		117	0.825201	0	0	10	0	5	0	1	1.58
35	CCCCCCCCCCCCn1c2ccc(cc2c2c1ccc(c2)n1c2ccc(cc2c2c1ccc(c2)C(C)(C)C)C(C)(C)C)c1ccc(s1)c1ccc(s1)/C=C(/C(=O)O)\C#N	4.8			43	0.98378	0	0	3	1	1.51515	0	1	4		120	0.897576	0	0	8	0	4.05405	0	0	1.81
36	CCCCCCCCCCCCn1c2ccc(cc2c2c1ccc(c2)n1c2ccc(cc2c2c1ccc(c2)C(C)(C)C)C(C)(C)C)c1ccc(s1)c1ccc(s1)c1ccc(s1)/C=C(/C(=O)O)\C#N	5.69			44	0.920355	0	0	8	1	3.84615	0	1	5.45		121	0.864545	0	0	8	0	4.16667	0	1	1.84
37	CCCCCCCCCCCCn1c2ccc(cc2c2c1ccc(c2)n1c2ccc(cc2c2c1ccc(c2)C(C)(C)C)C(C)(C)C)c1ccc(s1)c1ccc(s1)c1ccc(cc1)/C=C(/C(=O)O)\C#N	4.82			45	0.765979	0	0	4	1	4.08163	0	1	0.819		125	0.936618	0	0	7	0	2.89855	0	0	0.97
38	N#C/C(=C/c1ccc(s1)c1ccc(s1)c1ccc(s1)c1ccc(cc1)N(c1ccc(cc1)n1c2ccc(cc2c2c1ccc(c2)C(C)(C)C)C(C)(C)C)c1ccc(cc1)n1c2ccc(cc2c2c1ccc(c2)C(C)(C)C)C(C)(C)C)/C(=O)O	4.62			46	0.903234	0	0	8	1	4.22535	0	1	6.05		127	0.989681	0	0	3	1	1.47059	0	1	3.4
39	N#CC(=Cc1ccc(s1)c1ccc(cc1)N(c1ccc(cc1)n1c2ccccc2c2c1cccc2)c1ccc(cc1)n1c2ccccc2c2c1cccc2)C(=O)O	4.3			47	0.821663	0	0	3	1	5.55556	0	0	2.43		128	0.513573	0	0	13	1	3.01205	0	1	4.9
40	N#CC(=Cc1ccc(s1)C=Cc1ccc(cc1)n1c2ccc(cc2c2c1ccc(c2)C(C)(C)C)C(C)(C)C)C(=O)O	5.22			48	0.431961	0	0	5	0	4.28571	0	1	2.81		129	0.198166	0	6	19	0	2.29885	0	1	10.7
41	CCCCCCc1cc(sc1c1sc(c(c1)CCCCCC)/C=C(\C(=O)O)/C#N)c1sc(cc1CCCCCC)c1ccc2c(c1)c1ccccc1n2CC	3.9			50	0.190353	0	0	22	1	4.85437	0	1	7.52		136	0.491392	0	0	7	1	3.44828	1	1	5.87
42	COCCCCc1cc(sc1c1sc(c(c1)CCCCOC)c1sc(c(c1)CCCCOC)/C=C(/C(=O)O)\C#N)c1sc(cc1CCCCOC)c1ccc2c(c1)c1ccccc1n2CC	2.9			52	0.0211499	0	0	3	1	1.51515	0	1	4		137	0.700717	0	1	8	1	5.66038	0	0	0.75
43	CCCCCCc1cc(sc1c1sc(c(c1)CCCCCC)/C=C(/C(=O)O)\C#N)c1sc(cc1CCCCOC)c1sc(cc1CCCCOC)c1ccc2c(c1)c1ccccc1n2CC	4			53	0.805557	0	0	8	1	4.83871	0	0	0.99		143	0.773214	0	0	4	1	2.43902	0	1	4.78
44	CCCCn1c2cc(ccc2c2c1cc(cc2)N(c1ccccc1)c1ccccc1)c1ccc(s1)c1ccc(s1)/C=C(/C(=O)O)\C#N	5.45			54	0.862234	0	0	8	1	4.34783	0	1	4.22		144	0.706077	0	0	4	1	2.24719	0	1	4.33
45	N#CC(=Cc1ccc(s1)C#Cc1ccc(cc1)n1c2ccccc2c2c1cccc2)C(=O)O	0.819			55	0.894992	0	0	8	1	3.22581	0	1	4.95		145	0.756308	0	0	5	1	1.88679	0	1	3.38
46	CCCCn1c2cc(ccc2c2c1cc(cc2)N(c1ccccc1)c1ccccc1)c1ccc(s1)/C=C(/C(=O)O)\C#N	6.05			56	0.895529	0	0	8	1	3.94737	0	1	6.04		147	0.724073	0	0	8	1	3.0303	0	0	2.45
47	N#CC(=Cc1ccc2c(c1)c1ccccc1n2CC)C(=O)O	2.43			57	0.850328	0	0	8	1	3	0	1	5.48		149	0.738163	0	0	4	1	2.17391	0	1	2.23
48	CCCCCCn1c2ccc(cc2c2c1ccc(c2)C=C1SC(=S)N(C1=O)CC(=O)O)C=C1SC(=S)N(C1=O)CC(=O)O	2.81			60	0.96913	0	0	3	1	1.8018	0	1	5.6		155	0.713508	0	0	4	0	2.85714	0	1	1.51
49	CCCCCCc1cc(sc1/C=C(\C(=O)O)/C#N)c1sc2c(c1)c1nn(nc1c1c2sc(c1)c1ccc2c(c1)n(CC(CCCC)CC)c1c2cccc1)CC(CCCC)CC	8.07			62	0.450843	0	0	6	0	3.09278	0	1	1.88		161	0.337655	1	0	8	1	5.66038	0	1	2.01
50	CCCCC(Cn1nc2c(n1)c1cc(sc1c1c2cc(s1)c1ccc2c(c1)n(CC(CCCC)CC)c1c2cccc1)c1ccc(s1)/C=C(\C(=O)O)/C#N)CC	7.52			63	0.318966	0	2	10	1	3.25203	0	1	5.51		169	0.904156	0	0	5	1	3.94737	0	0	3.4
51	N#C/C(=C/c1ccc(cc1)/C=C/c1ccc2c(c1)c1ccccc1n2c1ccc(cc1)C)/C(=O)O	4.5			65	0.236123	1	0	17	1	4.25532	0	1	4.35		170	0.959866	0	0	4	1	3.44828	0	0	3.2
52	CCCCOCc1cc(sc1c1sc(c(c1)CCCCCC)c1sc(c(c1)CCCCCC)/C=C(/C(=O)O)\C#N)c1sc(cc1COCCCC)c1ccc2c(c1)c1ccccc1n2CC	4			66	0.360148	0	0	4	1	2.5974	0	1	1.44		174	0.570391	0	0	5	0	5.76923	0	1	1.44
53	CCCCn1c2cc(ccc2c2c1cc(cc2)/C=C(/C(=O)O)\C#N)n1c2ccccc2c2c1cccc2	0.99			67	0.361048	0	0	4	1	2.85714	0	1	4.57		175	0.507564	0	0	7	1	8.62069	0	0	0.33
54	CCCCn1c2cc(ccc2c2c1cc(cc2)n1c2ccccc2c2c1cccc2)c1ccc(s1)/C=C(/C(=O)O)\C#N	4.22			69	0.94699	0	0	4	1	3.1746	0	1	4.54		177	0.927844	0	0	5	1	5.76923	0	0	1.47
55	CCCCn1c2cc(ccc2c2c1cc(cc2)n1c2ccc(cc2c2c1ccc(c2)C(C)(C)C)C(C)(C)C)c1ccc(s1)/C=C(/C(=O)O)\C#N	4.95			74	0.389455	0	0	5	1	3.125	1	0	3.74
56	CCCCn1c2cc(ccc2c2c1cc(cc2)n1c2ccccc2c2c1cccc2)c1ccc(s1)c1ccc(s1)/C=C(/C(=O)O)\C#N	6.04			76	0.266049	0	0	11	0	4.16667	0	1	4.04
57	CCCCn1c2cc(ccc2c2c1cc(cc2)n1c2ccc(cc2c2c1ccc(c2)C(C)(C)C)C(C)(C)C)c1ccc(s1)c1ccc(s1)/C=C(/C(=O)O)\C#N	5.48			77	0.587717	0	0	11	1	4.71698	0	0	2.37
58	CCCCCCc1cc(sc1c1sc(c(c1)CCCCCC)c1ccc2c(c1)c1ccccc1n2CC)c1sc(cc1CCCCCC)c1sc(cc1CCCCCC)/C=C(\C(=O)O)/C#N	7.7			79	0.938746	0	0	5	1	3.94737	0	1	4.47
59	N#C/C(=C/c1ccc(s1)c1ccc(s1)c1ccc(s1)c1ccc2c(c1)c1ccccc1n2CC)/C(=O)O	4.8			80	0.884222	0	0	6	1	1.96078	0	1	2.82
60	CCCCCCc1cc(sc1c1sc(c(c1)CCCCCC)c1ccc2c(c1)c1ccccc1n2CC)c1sc(cc1CCCCCC)/C=C(\C(=O)O)/C#N	5.6			86	0.818819	0	0	5	1	4.30108	0	1	4
61	N#CC(=Cc1ccc(cc1)c1ccc2c(c1)c1ccccc1n2c1ccc2c(c1)C(C)(C)c1c2cccc1)C(=O)O	2.35			87	0.683001	0	0	6	1	4	0	1	3
62	CCn1c2ccc(cc2c2c1ccc(c2)c1ccc(s1)c1ccncc1)c1ccc(s1)c1ccc(cc1)N(c1ccc(cc1)c1cccs1)c1ccc(cc1)c1cccs1	1.88			89	0.431892	0	0	4	0	3.07692	0	1	1.23
63	CCCCCCN1c2ccc(cc2Sc2c1ccc(c2)C=C(C(=O)O)C#N)c1ccc(cc1)C=C(c1ccc(cc1)n1c2ccccc2c2c1cccc2)c1ccc(cc1)n1c2ccccc2c2c1cccc2	5.51			91	0.758154	0	0	7	1	6.25	0	1	0.19
64	CCCCCCn1c2ccc(cc2c2c1ccc(c2)C=C(C(=O)O)C#N)c1ccc(cc1)C=C(c1ccc(cc1)n1c2ccccc2c2c1cccc2)c1ccc(cc1)n1c2ccccc2c2c1cccc2	2.14			92	0.389967	0	0	6	0	4.47761	0	1	0.24
65	CCCCCCCCCCCCn1c2ccc(cc2c2c1ccc(c2)c1ccc(c2c1nsn2)c1ccc2c(c1)n(CCCCCCCCCCCC)c1c2cc(cc1)/C=C(/C(=O)O)\C#N)/C=C(/C(=O)O)\C#N	4.35			94	0.928482	0	0	9	1	2.8777	0	1	7.33
66	CCCCn1c2ccc(cc2c2c1ccc(c2)/C=C(/C(=O)O)\C#N)c1sc(cc1c1ccc(cc1)OC)c1ccc(cc1)OC	1.44			95	0.808445	0	0	8	1	2.88462	0	1	5.76
67	CCCCn1c2ccc(cc2c2c1ccc(c2)c1ccc(s1)/C=C(/C(=O)O)\C#N)c1ccc(s1)c1ccc(cc1)OC	4.57			96	0.859738	0	0	8	1	3.09278	0	1	1.36
68	CCCCn1c2ccc(cc2c2c1ccc(c2)/C=C(/C(=O)O)\C#N)c1ccc(s1)c1ccc(cc1)OC	2.52			97	0.354662	0	0	0	0	0	0	0	0.0538
69	CCCCn1c2ccc(cc2c2c1ccc(c2)c1ccc(cc1)OC)c1ccc(s1)/C=C(/C(=O)O)\C#N	4.54			98	0.354662	0	0	0	0	0	0	0	0.0387
70	CCCCn1c2ccc(cc2c2c1ccc(c2)/C=C(/C(=O)O)\C#N)c1ccc(cc1)OC	1.87			99	0.753986	0	0	15	1	1.81818	0	1	7.58
71	N#CC(=Cc1ccc(s1)c1ccc(c2c1nsn2)c1ccc2c(c1)c1ccccc1n2c1ccc2c(c1)C(C)(C)c1c2cccc1)C(=O)O	4.35			100	0.827483	0	0	15	1	2.32558	0	1	6.98
72	N#CC(=Cc1ccc(o1)c1ccc(c2c1nsn2)c1ccc2c(c1)c1ccccc1n2c1ccc2c(c1)C(C)(C)c1c2cccc1)C(=O)O	4.96			101	0.739714	0	0	17	1	3.4965	0	1	8.09
73	N#CC(=Cc1ccc(cc1)c1ccc(c2c1nsn2)c1ccc2c(c1)c1ccccc1n2c1ccc2c(c1)C(C)(C)c1c2cccc1)C(=O)O	4.05			102	0.825784	0	0	15	1	2.3622	0	1	6.25
74	N#CC(=Cc1ccc(o1)c1ccc2c(c1)c1ccccc1n2c1ccc2c(c1)C(C)(C)c1c2cccc1)C(=O)O	3.74			103	0.738708	0	1	6	1	1.50376	0	1	7.54
75	N#CC(=Cc1ccc2c(c1)c1cc(ccc1n2CC)c1ccc(cc1)C=C(c1ccc(cc1)N(C)C)c1ccc(cc1)N(C)C)C(=O)O	1.9			104	0.138576	0	1	6	1	2.8169	1	0	6.93
76	CCCCCCn1c2ccc(cc2c2c1ccc(c2)/C=C(/c1ccc(cc1)c1ccc(cc1)/C=C\1/SC(=S)N(C1=O)CC(=O)O)\C#N)C=C(c1ccc(cc1)c1ccc(cc1)/C=C/1\SC(=S)N(C1=O)CC(=O)O)C#N	4.04			105	0.643586	0	1	6	1	2.8169	0	1	6.01
77	CCCCCCn1c2ccc(cc2c2c1ccc(c2)/C=C(/c1ccc(cc1)c1ccc(cc1)/C=C(\C(=O)O)/C#N)\C#N)C=C(c1ccc(cc1)c1ccc(cc1)/C=C(\C(=O)O)/C#N)C#N	2.37			108	0.751657	0	0	4	1	3.92157	0	1	4.3
78	CCCCCCCCn1c2ccc(cc2c2c1ccc(c2)c1ccc(s1)c1ccc(s1)/C=C(/C(=O)O)\C#N)c1ccc(s1)c1ccc(s1)/C=C(/C(=O)O)\C#N	4.22			110	0.856242	0	0	4	1	4.25532	0	1	2.74
79	CCCCCCCCn1c2ccc(cc2c2c1ccc(c2)c1ccc(s1)/C=C(/C(=O)O)\C#N)c1ccc(s1)/C=C(/C(=O)O)\C#N	4.47			112	0.894859	0	0	5	1	4.83871	0	0	0.96
80	CCCCCCCCC(n1c2ccc(cc2c2c1ccc(c2)c1sc(cc1CCCCCC)c1ccc(s1)/C=C(\C(=O)O)/C#N)c1sc(cc1CCCCCC)c1ccc(s1)/C=C(\C(=O)O)/C#N)CCCCCCCC	2.82			113	0.886911	0	0	10	1	2.89855	0	1	4.24
81	CCCCCCCCC(n1c2ccc(cc2c2c1ccc(c2)c1ccc(s1)c1ccc(s1)c1ccc(s1)/C=C(/C(=O)O)\C#N)c1ccc(s1)c1ccc(s1)c1ccc(s1)/C=C(\C(=O)O)/C#N)CCCCCCCC	4.41			114	0.932743	0	0	8	1	2.77778	0	1	5.39
82	CCCCCCCCC(n1c2ccc(cc2c2c1ccc(c2)c1ccc(s1)c1ccc(s1)/C=C(\C(=O)O)/C#N)c1ccc(s1)c1ccc(s1)/C=C(\C(=O)O)/C#N)CCCCCCCC	4.26			115	0.401839	0	0	8	1	2.08333	0	1	4.2
83	CCCCCCn1c2ccc(cc2c2c1ccc(c2)c1sc(cc1CCCCCC)c1ccc(s1)/C=C(\C(=O)O)/C#N)c1sc(cc1CCCCCC)c1ccc(s1)/C=C(\C(=O)O)/C#N	4.55			116	0.386972	0	0	8	1	2.18978	0	1	1.78
84	CCCCCCn1c2ccc(cc2c2c1ccc(c2)c1ccc(s1)c1ccc(s1)c1ccc(s1)/C=C(/C(=O)O)\C#N)c1ccc(s1)c1ccc(s1)c1ccc(s1)/C=C(\C(=O)O)/C#N	3.64			118	0.665444	0	0	10	0	5.6338	0	1	0.89
85	CCCCCCn1c2ccc(cc2c2c1ccc(c2)c1ccc(s1)c1ccc(s1)/C=C(/C(=O)O)\C#N)c1ccc(s1)c1ccc(s1)/C=C(\C(=O)O)/C#N	4.82			119	0.744297	0	0	8	0	3.7037	0	1	2.35
86	N#C/C(=C\c1ccc(s1)c1ccc2c(c1)c1cc(ccc1n2CC)c1ccc(cc1)C=C(c1ccc(cc1)N(C)C)c1ccc(cc1)N(C)C)/C(=O)O	4			122	0.749423	0	0	7	0	5	0	1	1.89
87	N#C/C(=C/c1ccc2c(c1)c1ccc(cc1n2CC)c1ccc(s1)c1ccc(s1)c1ccc(cc1)C=C(c1ccc(cc1)N(C)C)c1ccc(cc1)N(C)C)/C(=O)O	3			123	0.822263	0	0	8	0	4.61538	0	0	1.15
88	N#C/C(=C/c1ccc2c(c1)c1ccc(cc1n2CC)c1ccc(s1)c1ccc(cc1)C=C(c1ccc(cc1)N(C)C)c1ccc(cc1)N(C)C)/C(=O)O	3.1			124	0.666457	0	0	7	0	5.66038	0	0	1.04
89	CCCCCCn1c2ccc(cc2c2c1cccc2)c1ccc(cc1)/C=C/1\SC(=S)N(C1=O)CC(=O)O	1.23			126	0.887514	0	0	6	0	3.50877	0	0	0.91
90	CCCCCCn1c2ccc(cc2c2c1cccc2)c1ccc(cc1)/C=C(\C(=O)O)/C#N	1.94			130	0.023511	0	6	15	0	1.34529	0	1	9.8
91	CCCCCCn1c2ccc(cc2c2c1cccc2)/C=C(\c1ccc(s1)C=C1C(=O)NC(=O)NC1=O)/C#N	0.19			131	0.0255768	0	6	14	0	2.83019	0	1	7.6
92	CCCCCCn1c2ccc(cc2c2c1cccc2)/C=C(\c1ccc(s1)/C=C\1/SC(=S)N(C1=O)CC(=O)O)/C#N	0.24			132	0.0318699	0	0	5	1	1.85185	3	1	12.5
93	CCCCCCn1c2ccc(cc2c2c1cccc2)/C=C(\c1ccc(s1)/C=C(/C(=O)O)\C#N)/C#N	3.55			133	0.0331959	0	0	5	1	2	2	1	9.32
94	CCCCCCC(Cc1cc(sc1c1sc2c(c1)c1nonc1c1c2sc(c1)c1sc(cc1CC(CCCCCC)CCCC)c1ccc2c(c1)c1ccccc1n2CC)/C=C(/C(=O)O)\C#N)CCCC	7.33			134	0.471703	0	0	13	1	3.31126	1	1	6.16
95	CCCCOc1ccc(cc1)N(c1ccc2c(c1)n(CCCC)c1c2ccc(c1)c1ccc(s1)c1ccc(s1)/C=C(/C(=O)O)\C#N)c1ccc(cc1)OCCCC	5.76			135	0.473722	0	0	10	1	3.36134	1	1	6.33
96	CCCCn1c2cc(ccc2c2c1cc(cc2)c1ccc(s1)/C=C(/C(=O)O)\C#N)N(c1ccc(cc1)OCCCC)c1ccc(cc1)OCCCC	1.36			138	0.495384	2	1	18	1	3.4965	0	1	2.17
97	CCCCCCCC[N+]1=C(/C=C/c2ccc3c(c2)c2ccccc2n3CCCCCCn2c3ccc(cc3c3c2cccc3)/C=C/C2=[N+](CCCCCCCC)c3c(C2(C)C)cc(cc3)C(=O)O)C(c2c1ccc(c2)C(=O)O)(C)C.[I-].[I-]	0.0538			139	0.584335	2	1	18	1	4.6729	0	1	3.17
98	CCCCCCCC[N+]1=C(/C=C/c2ccc3c(c2)c2ccccc2n3CCCCCC)C(c2c1ccc(c2)C(=O)O)(C)C.[I-]	0.0387			140	0.577008	2	1	18	1	5.26316	0	1	4.27
99	CCCCCCCCOc1ccc(cc1)c1c2c3ccccc3n(c2c(c2c1n(CCCCCCCC)c1c2cc(cc1)c1ccc(s1)/C=C(/C(=O)O)\C#N)c1ccc(cc1)OCCCCCCCC)CCCCCCCC	7.58			141	0.495341	2	1	16	1	6.0241	0	1	2.58
100	CCCCCCCCn1c2ccc(cc2c2c1c(c1ccc(cc1)OCC)c1c(c2c2ccc(cc2)OCC)n(c2c1cccc2)CCCCCCCC)c1ccc(s1)/C=C(/C(=O)O)\C#N	6.98			142	0.298034	1	1	9	1	3.19149	0	0	3.18
101	CCCCCCCCn1c2ccc(cc2c2c1c(c1ccc(cc1)N(CC)CC)c1c(c2c2ccc(cc2)N(CC)CC)n(c2c1cccc2)CCCCCCCC)c1ccc(s1)/C=C(/C(=O)O)\C#N	8.09			146	0.827503	0	0	8	1	3.9604	0	1	3.2
102	CCCCCCCCn1c2ccc(cc2c2c1c(c1ccc(cc1)CC)c1c(c2c2ccc(cc2)CC)n(c2c1cccc2)CCCCCCCC)c1ccc(s1)/C=C(/C(=O)O)\C#N	6.25			148	0.514139	0	0	9	1	2.7027	0	0	2.24
103	CCCCCCCCc1cc(sc1c1ccc(s1)c1sc(cc1CCCCCCCC)C=C(C(=O)O)C#N)c1cc2c(c3c1cccc3)n(c1c2cc(OC)cc1)C(CCCCC)CC	7.54			150	0.368445	1	1	7	1	5.76923	0	0	2.49
104	CCCCCC(n1c2ccc(cc2c2c1c1ccccc1c(c2)c1ccc(o1)C=C(C(=O)O)C#N)OC)CC	6.93			151	0.729583	0	0	7	0	3.57143	0	1	4.7
105	CCCCCC(n1c2ccc(cc2c2c1c1ccccc1c(c2)c1ccc(s1)C=C(C(=O)O)C#N)OC)CC	6.01			152	0.456277	0	0	3	0	1.35135	0	1	1.37
106	N#C/C(=C/c1ccc(cc1)n1c2ccccc2c2c1cccc2)/C(=O)O	1.77			153	0.606597	0	0	5	0	4.54545	0	1	2.04
107	N#C/C(=C\c1ccc(s1)c1ccc(s1)c1ccc(s1)n1c2ccc(cc2c2c1ccc(c2)n1c2ccccc2c2c1cccc2)n1c2ccccc2c2c1cccc2)/C(=O)O	4.86			154	0.0422694	0	0	3	0	1.38889	0	1	0.07
108	N#C/C(=C\c1ccc(s1)c1ccc(s1)c1ccc(s1)n1c2ccccc2c2c1cccc2)/C(=O)O	4.3			156	0.247684	0	0	4	0	2.89855	0	1	0.06
109	N#C/C(=C\c1ccc(s1)c1ccc(s1)n1c2ccccc2c2c1cccc2)/C(=O)O	2.94			157	0.851742	0	0	7	0	2.94118	0	0	0.31
110	N#C/C(=C\c1ccc(s1)c1ccc(cc1)n1c2ccccc2c2c1cccc2)/C(=O)O	2.74			158	0.629782	0	0	8	0	4.16667	0	1	1.47
111	CCCCCCn1c2ccc(cc2c2c1cccc2)c1ccc(cc1)C=C1C(=O)NC(=S)NC1=O	0.54			159	0.851742	0	0	7	0	2.94118	0	0	0.21
112	CCCCCCn1c2ccc(cc2c2c1cccc2)c1ccc(cc1)C=C1C(=O)NC(=O)NC1=O	0.96			160	0.839136	0	0	5	0	2.94118	0	0	0.34
113	CCCCCCn1c2ccc(cc2c2c1cccc2)c1cc(sc1c1sc(c(c1)c1ccc2c(c1)c1ccccc1n2CCCCCC)c1ccc2c(c1)c1ccccc1n2CCCCCC)/C=C(/C(=O)O)\C#N	4.24			162	0.856655	0	0	9	1	4.7619	0	1	4.72
114	CCCCn1c2ccc(cc2c2c1cccc2)c1ccc(s1)c1cc2c(s1)c1c(n2c2ccc3c(c2)C(CCCC)(CCCC)c2c3cccc2)cc(s1)/C=C(\C(=O)O)/C#N	5.39			163	0.862164	0	0	9	1	4.61538	0	1	4.47
115	CCCCn1c2cc(ccc2c2c1cc(cc2)N(c1ccc(cc1)c1ccc2c(c1)C(CC)(CC)c1c2cccc1)c1ccc(cc1)c1ccc2c(c1)C(CC)(CC)c1c2cccc1)c1ccc(s1)c1ccc(s1)/C=C(/C(=O)O)\C#N	4.2			164	0.964284	0	0	4	1	1.78571	0	1	5.31
116	CCCCn1c2cc(ccc2c2c1cc(cc2)N(c1ccc(cc1)c1ccc2c(c1)C(CC)(CC)c1c2cccc1)c1ccc(cc1)c1ccc2c(c1)C(CC)(CC)c1c2cccc1)c1ccc(s1)/C=C(/C(=O)O)\C#N	1.78			165	0.955064	0	0	5	1	1.68067	0	1	5.41
117	OC(=O)CCCCCCn1c2cc(ccc2c2c1cc(cc2)N(c1ccccc1)c1ccccc1)c1ccc(s1)c1cnccn1	1.58			166	0.84711	0	0	5	1	1.27389	0	1	5.88
118	CCCCn1c2cc(ccc2c2c1cc(cc2)N(c1ccccc1)c1ccccc1)c1ccc(s1)c1cnccn1	0.89			167	0.127503	0	0	5	1	4.28571	2	0	3.2
119	OC(=O)CCCCCCn1c2cc(ccc2c2c1cc(cc2)N(c1ccccc1)c1ccccc1)c1ccc(s1)c1ccncc1	2.35			168	0.915329	0	0	5	1	4.28571	0	1	3.8
120	OC(=O)CCCCCCn1c2cc(ccc2c2c1cc(cc2)c1ccncc1)N(c1ccccc1)c1ccccc1	1.81			171	0.917471	0	0	4	1	3.44828	0	0	4
121	CCCCn1c2cc(ccc2c2c1cc(cc2)N(c1ccccc1)c1ccccc1)c1ccc(s1)c1ccncc1	1.84			172	0.917471	0	0	4	1	3.44828	0	0	2.7
122	c1ccc(cc1)N(c1ccc2c(c1)[nH]c1c2ccc(c1)c1ccc(s1)c1ccncc1)c1ccccc1	1.89			173	0.902394	0	0	4	1	3.44828	0	0	3.5
123	CCCCn1c2cc(ccc2c2c1cc(cc2)c1ccncc1)N(c1ccccc1)c1ccccc1	1.15			176	0.790157	0	0	5	1	6.52174	0	0	1.26
124	c1ccc(cc1)N(c1ccc2c(c1)[nH]c1c2ccc(c1)c1ccncc1)c1ccccc1	1.04			178	0.780926	0	0	12	1	3.0303	0	1	7.43
125	CCCCn1c2cc(ccc2c2c1cc(cc2)N(c1ccccc1)c1ccccc1)c1ccc(cc1)C(=O)O	0.97			179	0.748518	0	0	12	1	3.73832	0	1	5.31
126	OC(=O)c1ccc(cc1)c1ccc2c(c1)[nH]c1c2ccc(c1)N(c1ccccc1)c1ccccc1	0.91
127	CCCCCCc1cc(sc1c1sc(cc1CCCCCC)c1sc(c(c1)CCCCCC)/C=C(\C(=O)O)/C#N)c1sc(cc1CCCCCC)c1ccc2c(c1)c1ccccc1n2CC	3.4
128	CCCCCCn1c2ccc(cc2c2c1ccc(c2)N(c1ccc(cc1)c1ccc(s1)c1ccc(s1)/C=C(/C(=O)O)\C#N)c1ccc(cc1)OCCCCCC)N(c1ccc(cc1)c1ccc(s1)c1ccc(s1)/C=C(/C(=O)O)\C#N)c1ccc(cc1)OCCCCCC	4.9
129	CCCCCCCCC(Cn1c2cc(C#Cc3ccc(c4c3nsn4)c3ccc(cc3)C(=O)O)c3c4c2c2c1cc(c1ccc5c(c1)c1ccccc1n5CC(CCCCCCCC)CCCCCC)c1c2c(c4ccc3)ccc1)CCCCCC	10.7
130	CCCCCCCCC(Cn1c2cc(C#Cc3ccc(c4c3nsn4)c3ccc(cc3)C(=O)O)c3c4c2c2c1cc(c1ccc5c(c1)c1ccccc1C5(CC(CCCCCCCC)CCCCCC)CC(CCCCCCCC)CCCCCC)c1c2c(c4ccc3)ccc1)CCCCCC	9.8
131	CCCCCCCCC(Cn1c2ccc3c4c2c2c1cc(C#Cc1ccc(c5c1nsn5)c1ccc(cc1)C(=O)O)c1c2c(c4ccc3)ccc1)CCCCCC	7.6
132	CCCCCCc1cc(sc1c1cc(c(s1)/C=C(/C(=O)Nc1ccc(cc1)[Si](OC)(OC)OC)\C#N)CCCCCC)c1sc(cc1CCCCCC)c1sc(cc1CCCCCC)c1ccc2c(c1)c1ccccc1n2CC	12.5
133	CCCCCCc1cc(sc1c1sc(c(c1)CCCCCC)/C=C(/C(=O)Nc1ccc(cc1)C(=O)O)\C#N)c1sc(cc1CCCCCC)c1sc(cc1CCCCCC)c1ccc2c(c1)c1ccccc1n2CC	9.32
134	CCCCn1c2ccc(cc2c2c1ccc(c2)c1ccc2c(c1)c1cc(ccc1n2CCCC)c1sc(c2c1OCCO2)/C=C(/C(=O)O)\C#N)c1ccc2c(c1)c1cc(ccc1n2CCCC)c1ccc2c(c1)c1ccccc1n2CCCC	6.16
135	CCCCn1c2ccc(cc2c2c1ccc(c2)c1ccc2c(c1)c1ccccc1n2CCCC)c1ccc2c(c1)c1cc(ccc1n2CCCC)c1sc(c2c1OCCO2)/C=C(/C(=O)O)\C#N	6.33
136	CCCCn1c2ccc(cc2c2c1ccc(c2)c1sc(c2c1OCCO2)/C=C(/C(=O)O)\C#N)c1ccc2c(c1)c1ccccc1n2CCCC	5.87
137	N#C/C(=C\c1ccc2c(n1)ccc(c2)n1c2ccc(cc2c2c1ccc(c2)OC)OC)/C(=O)O	0.75
138	CCCCCCCCCCCCn1c2ccccc2c2c1ccc(c2)c1nc2ccc(cc2nc1c1ccc2c(c1)c1ccccc1n2CCCCCCCCCCCC)c1ccc(s1)C=C(C(=O)O)C#N	2.17
139	CCCCCCn1c2ccccc2c2c1ccc(c2)c1nc2ccc(cc2nc1c1ccc2c(c1)c1ccccc1n2CCCCCC)c1ccc(s1)C=C(C(=O)O)C#N	3.17
140	CCCCn1c2ccc(cc2c2c1cccc2)c1nc2cc(ccc2nc1c1ccc2c(c1)c1ccccc1n2CCCC)c1ccc(s1)C=C(C(=O)O)C#N	4.27
141	N#CC(=Cc1ccc(s1)c1ccc2c(c1)nc(c(n2)c1ccc2c(c1)c1ccccc1n2CC)c1ccc2c(c1)c1ccccc1n2CC)C(=O)O	2.58
142	CCCCCCCCn1c2ccccc2c2c1ccc1c2c2c3cc(ccc3n(c2cc1)CCCCCCCC)/C=C(/C(=O)O)\C#N	3.18
143	N#C/C(=C\c1sc2c(c1)C(c1c2sc(c1)c1ccc(s1)n1c2ccc(cc2c2c1ccc(c2)C(C)(C)C)C(C)(C)C)(C)C)/C(=O)O	4.78
144	N#C/C(=C\c1sc2c(c1)C(c1c2sc(c1)c1ccc(s1)c1ccc(s1)n1c2ccc(cc2c2c1ccc(c2)C(C)(C)C)C(C)(C)C)(C)C)/C(=O)O	4.33
145	CCCCCCCCc1cc(sc1c1sc2c(c1)C(c1c2sc(c1)/C=C(/C(=O)O)\C#N)(C)C)n1c2ccc(cc2c2c1ccc(c2)C(C)(C)C)C(C)(C)C	3.38
146	CCCCCCn1c2ccc(cc2c2c1cccc2)c1c(/C=C(/C(=O)O)\C#N)sc(c1c1ccc2c(c1)c1ccccc1n2CCCCCC)/C=C(/C(=O)O)\C#N	3.2
147	N#CC(=Cc1ccc(cc1)C#Cc1ccc2c(c1)n(c1ccc(cc1)C(F)(F)F)c1c2ccc(c1)n1c2ccc(cc2c2c1ccc(c2)C(C)(C)C)C(C)(C)C)C(=O)O	2.45
148	N#CC(=Cc1ccc(cc1)C#Cc1ccc2c(c1)n(c1ccc(cc1)C(F)(F)F)c1c2ccc(c1)C#Cc1ccc(cc1)n1c2ccc(cc2c2c1ccc(c2)C(C)(C)C)C(C)(C)C)C(=O)O	2.24
149	N#CC(=Cc1ccc(cc1)C#Cc1ccc(s1)c1ccc(s1)C#Cc1ccc(cc1)n1c2ccc(cc2c2c1ccc(c2)C(C)(C)C)C(C)(C)C)C(=O)O	2.23
150	N#C/C(=C\c1ccc2c(c1)c1c(n2C)ccc2c1c1c3ccccc3n(c1cc2)C)/C(=O)O	2.49
151	CCCCCCn1c2ccc(cc2c2c1ccc(c2)/C=C(/c1ccc(s1)C=C(C(=O)O)C(=O)O)\C#N)/C=C(/c1ccc(s1)C=C(C(=O)O)C(=O)O)\C#N	4.7
152	CCCCn1c2ccc(cc2c2c1ccc(c2)c1ccc(s1)c1ccc(cc1)C(=O)O)c1ccc(s1)c1ccc(cc1)C(=O)O	1.37
153	CCCCn1c2ccc(cc2c2c1ccc(c2)c1ccc(s1)c1ccncc1)c1ccc(s1)c1ccncc1	2.04
154	CCCCn1c2ccc(cc2c2c1ccc(c2)c1ccc(s1)c1ccc(c(c1)O)O)c1ccc(s1)c1ccc(c(c1)O)O	0.07
155	CCCCn1c2ccc(cc2c2c1ccc(c2)c1ccc(s1)c1ccncc1)c1ccc(s1)c1ccc(cc1)C(=O)O	1.51
156	CCCCn1c2ccc(cc2c2c1ccc(c2)c1ccc(s1)c1ccncc1)c1ccc(s1)c1ccc(c(c1)O)O	0.06
157	CCCCn1c2ccc(cc2c2c1ccc(c2)N(c1ccccc1)c1ccccc1)c1ccc(c(c1)O)O	0.31
158	CCCCn1c2ccc(cc2c2c1ccc(c2)N(c1ccccc1)c1ccccc1)c1ccc(s1)c1ccncc1	1.47
159	CCCCn1c2ccc(cc2c2c1ccc(c2)N(c1ccccc1)c1ccccc1)c1ccc(c(c1)O)O.CCCCn1c2ccc(cc2c2c1ccc(c2)N(c1ccccc1)c1ccccc1)c1ccc(s1)c1ccncc1	0.21
160	CCCCn1c2ccc(cc2c2c1ccc(c2)c1ccc(s1)c1ccncc1)c1ccc(s1)c1ccncc1.CCCCn1c2ccc(cc2c2c1ccc(c2)N(c1ccccc1)c1ccccc1)c1ccc(c(c1)O)O	0.34
161	N#C/C(=C/c1ccc(s1)c1scc(n1)c1ccc(cc1)n1c2ccccc2c2c1cccc2)/C(=O)O	2.01
162	N#C/C(=C/c1ccc(s1)c1scc(n1)c1ccc(cc1)c1ccc2c(c1)n(c1ccccc1)c1c2cccc1)/C(=O)O	4.72
163	CCCCn1c2ccccc2c2c1cc(cc2)c1ccc(cc1)c1csc(n1)c1ccc(s1)/C=C(\C(=O)O)/C#N	4.47
164	CCCCCCOc1ccc(cc1)c1ccc2c(c1)c1cc(ccc1n2c1ccc(cc1)c1ccc(s1)c1ccc(s1)C=C(C(=O)O)C#N)c1ccc(cc1)OCCCCCC	5.31
165	CCCCCCOc1ccc(cc1)c1ccc2c(c1)c1cc(ccc1n2c1ccc2c(c1)C(C)(C)c1c2sc(c1)c1ccc(s1)C=C(C(=O)O)C#N)c1ccc(cc1)OCCCCCC	5.41
166	CCCCCCOc1cc(OCCCCCC)ccc1c1ccc2c(c1)c1cc(ccc1n2c1ccc2c(c1)C(C)(C)c1c2sc(c1)c1ccc(s1)C=C(C(=O)O)C#N)c1ccc(cc1OCCCCCC)OCCCCCC	5.88
167	CCCCCCn1c2ccc(cc2c2c1ccc(c2)c1ccc(o1)/C=C(\C(=O)O)/C#N)c1ccc(o1)C=C(C(=O)O)C#N	3.2
168	CCCCCCn1c2ccc(cc2c2c1ccc(c2)c1ccc(s1)/C=C(\C(=O)O)/C#N)c1ccc(s1)C=C(C(=O)O)C#N	3.8
169	CCCCCCn1c2ccc(cc2c2c1ccc(c2)c1ccc(cc1)/C=C(\C(=O)O)/C#N)c1ccc(cc1)C=C(C(=O)O)C#N	3.4
170	CCCCCCn1c2ccc(cc2c2c1cccc2)c1ccc(cc1)C=C(C(=O)O)C#N	3.2
171	CCCCCCn1c2ccc(cc2c2c1cccc2)c1ccc(c(c1)F)C=C(C(=O)O)C#N	4
172	CCCCCCn1c2ccc(cc2c2c1cccc2)c1ccc(cc1F)C=C(C(=O)O)C#N	2.7
173	CCCCCCn1c2ccc(cc2c2c1cccc2)c1ccc(c(c1F)F)C=C(C(=O)O)C#N	3.5
174	CCCCn1c2ccc(cc2c2c1ccc(c2)C=C1SC(=O)NC1=O)C=C1SC(=O)NC1=O	1.44
175	CCCCn1c2ccc(cc2c2c1ccc(c2)C=C1C(=O)NC(=O)NC1=O)C=C1C(=O)NC(=O)NC1=O	0.33
176	CCCCn1c2ccc(cc2c2c1cccc2)C=C1C(=O)NC(=O)NC1=O	1.26
177	CCCCCCn1c2ccc(cc2c2c1cccc2)C=C1C(=O)NC(=O)NC1=O	1.47
178	CCCCCCc1cc(sc1c1ccc(cc1)N(c1ccc2c(c1)c1ccccc1n2c1ccccc1)c1ccc2c(c1)c1ccccc1n2c1ccccc1)c1sc(cc1CCCCCC)/C=C(\C(=O)O)/C#N	7.43
179	CCCCCCc1cc(sc1c1ccc(cc1)N(c1ccc2c(c1)c1ccccc1n2c1ccccc1)c1ccc2c(c1)c1ccccc1n2c1ccccc1)/C=C(\C(=O)O)/C#N	5.31

## Sheet: Indolines
Indoline Dye					Trainig Set									Test Set
ID	SMILES	PCE			ID	RA function(LK)	CVsim(LK)	Neg.Avg.Sim	F04[C-N]	B09[O-S]	nCconj	PCE		ID	RA function(LK)	CVsim(LK)	Neg.Avg.Sim	F04[C-N]	B09[O-S]	nCconj	PCE
1	CCCCCCCCn1c(=O)/c(=c/2\c(=C/c3ccc(s3)c3ccc4c(c3)C3CCCC3N4c3ccc4c(c3)Cc3c4cccc3)\sc(=O)n2CC(=O)O)/sc1=C(C#N)C#N	5.15			1	5.24996	0.26878	0	7	0	8	5.15		9	5.22997	0.33891	0	8	0	8	4.49
2	CCCCCCCCn1c(=O)/c(=c/2\c(=C/c3ccc(s3)c3ccc4c(c3)C3CCCC3N4c3ccc4c(c3)C(C)(C)c3c4cccc3)\sc(=O)n2CC(=O)O)/sc1=C(C#N)C#N	5.55			2	5.15976	0.638963	0	7	0	8	5.55		11	7.51329	0.471038	0	14	0	9	7.53
3	CCCCCCCCn1c(=C(C#N)C#N)s/c(=c\2/c(=C\c3ccc(s3)c3ccc4c(c3)C3CCCC3N4c3ccc4c(c3)C(CCCC)(CCCC)c3c4cccc3)/sc(=O)n2CC(=O)O)/c1=O	5.34			3	5.22348	0.638963	0	7	0	8	5.34		15	3.90738	0.243339	0.809417	4	0	3	4.62
4	CCCCCCCCn1c(=C(C#N)C#N)s/c(=c\2/c(=C\c3ccc(s3)c3ccc4c(c3)C3CCCC3N4c3ccc4c(c3)C(CCCCCCCC)(CCCCCCCC)c3c4cccc3)/sc(=O)n2CC(=O)O)/c1=O	4.92			4	5.33218	0.627649	0	7	0	8	4.92		17	8.23066	0.348511	0	18	0	9	8.12
5	CCCCCCCCN1C(=S)S/C(=c\2/s/c(=C\c3ccc4c(c3)C3CCCC3N4c3ccc(cc3)C=C(c3ccccc3)c3ccccc3)/c(=O)n2CC(=O)O)/C1=O	4.92			5	4.57739	0.988101	0.419987	5	0	6	4.92		22	4.60563	0.283101	0.0786492	9	1	4	6.28
6	CCCCCCCCn1c(=O)/c(=c/2\c(=Cc3ccc4c(c3)C3CCCC3N4c3ccc(cc3)C=C(c3ccccc3)c3ccccc3)sc(=O)n2CC(=O)O)/sc1=C(C#N)C#N	5.15			6	5.20291	0.540744	0	6	0	6	5.15		23	6.30064	0.851014	0	9	0	4	7.13
7	CCCCC1(CCCC)c2cc(ccc2c2c1cccc2)N1C2CCCC2c2c1ccc(c2)c1ccc(s1)/C=c\1/sc(=O)n(/c1=c/1\sc(=C(C#N)C#N)n(c1=O)CCCCCCCC(=O)O)CC(=O)O	5.19			7	5.26899	0.638963	0	7	0	8	5.19		25	7.92821	0.494954	0	18	0	11	9
8	CCCCCc1nc2c3cc(sc3c3c(c2nc1CCCCC)cc(s3)/C=C(/C(=O)O)\C#N)c1ccc(c2c1nsn2)c1ccc2c(c1)C1CCCC1N2c1ccc(cc1)C	7.12			8	7.96973	0.223067	0	20	0	5	7.12		28	3.5254	0.682222	0.582521	5	0	2	4.08
9	CCCCCCCCn1c(=O)s/c(=C/c2ccc(s2)c2ccc3c(c2)C2CCCC2N3c2ccc3c(c2)C(CCCC)(CCCC)c2c3cccc2)/c/1=c\1/sc(=C(C#N)C#N)n(c1=O)CCCCCCCC	4.49			10	5.92007	0.910071	0.114788	14	0	5	5		31	2.59653	1.03329	0.187038	13	0	1	3.07
10	CCCCCCn1c2ccc(cc2c2c1cccc2)N1c2ccc(cc2C2C1CCC2)c1ccc(c2c1nsn2)c1ccc(s1)/C=C(\C(=O)O)/C#N	5			13	7.83672	0.968098	0	21	0	13	8.43		37	2.14396	0.983661	0.220298	33	0	7	2.8
11	CCCCCCCCCC1(CCCCCCCC)c2cc(sc2c2c1cc(s2)/C=C(\C(=O)O)/C#N)c1ccc(c2c1nsn2)c1ccc2c(c1)C1CCCC1N2c1ccc2c(c1)c1ccccc1n2CCCCCC	7.53			14	3.93152	0.504495	0.604899	4	0	5	3.85		38	4.45778	2.02955	0.046557	34	0	6	4.8
13	CCCCCCCCOc1cc(OCCCCCCCC)ccc1c1ccc(cc1)C(=Cc1ccc(cc1)N1c2ccc(cc2C2C1CCC2)c1ncc(c2c1nc(c1ccccc1)c(n2)c1ccccc1)c1ccc(s1)/C=C(/C(=O)O)\C#N)c1ccc(cc1)c1ccc(cc1OCCCCCCCC)OCCCCCCCC	8.43			16	3.2485	0.845368	0.415269	5	0	2	4.07		42	2.83698	1.02118	0.17174	33	0	3	3.2
14	CCCCCCCCCCCCc1cc(sc1c1sc2c(c1)sc(c2)/C=C(\C(=O)O)/C#N)c1ccc(cc1)N1c2ccc(cc2C2C1C1CCC2C1)C=C(c1ccccc1)c1ccccc1	3.85			18	8.47809	0.396486	0	18	0	13	7.28		45	7.01347	0.416688	0	6	0	5	7.18
15	CCCCCCCCCCCCc1cc(sc1c1sc2c(c1)sc(c2)/C=C(\C(=O)O)/C#N)c1ccc(cc1)N1c2ccc(cc2C2C1C1CCC2C1)c1cccs1	4.62			19	8.46677	0.703665	0	18	0	7	7.79		47	2.57454	0.53085	0.629621	3	0	3	2.27
16	CCn1o/c(=c/2\c(=Cc3ccc(cc3)c3ccc4c(c3)C3CCCC3N4c3ccccc3)sc(=O)n2CC(=O)O)/sc1=S	4.07			20	1.86701	0.202005	0.169547	7	0	2	3.34		58	7.00821	0.725506	0	6	0	6	6.22
17	CCCCCCOc1cc(OCCCCCC)ccc1c1ccc(cc1)N1c2ccc(cc2C2C1CCC2)c1ccc(c2c1nc(c1ccccc1)c(n2)c1ccccc1)c1ccc(s1)/C=C(/C(=O)O)\C#N	8.12			21	5.79527	0.655076	0.113479	10	1	5	6.12		63	4.1624	0.896686	0.773804	8	1	9	4.09
18	CCCCCCOc1cc(OCCCCCC)ccc1c1ccc(cc1)C(=Cc1ccc(cc1)N1c2ccc(cc2C2C1CCC2)c1ccc(c2c1nc(c1ccccc1)c(n2)c1ccccc1)c1ccc(s1)/C=C(/C(=O)O)\C#N)c1ccc(cc1)c1ccc(cc1OCCCCCC)OCCCCCC	7.28			24	7.88	0.703665	0	18	0	7	9.2		64	4.1624	0.896686	0.773804	8	1	9	4.35
19	N#C/C(=C\c1ccc(s1)c1ccc(c2c1nc(c1ccccc1)c(n2)c1ccccc1)c1ccc2c(c1)C1CCCC1N2c1ccc(cc1)C)/C(=O)O	7.79			27	3.76039	0.752114	0.264792	8	0	2	2.12		65	4.17931	0.926207	0.823193	8	1	9	4.15
20	N#Cc1ccc(cc1)N1C2CCCC2c2c1ccc(c2)c1ccc(cc1)C=c1sc(=O)n(/c/1=c\1/on(c(=S)s1)CC)CC(=O)O	3.34			29	3.48449	0.845368	0.415269	5	0	2	3.58		72	4.62682	0.393074	0.154723	7	0	3	6.29
21	Cc1ccc(cc1)N1c2ccc(cc2C2C1CCC2)c1ccc(c2c1nsn2)c1ccc(cc1)C(=O)O	6.12			30	1.42478	1.19916	0.209518	13	0	1	0.77		74	3.69631	0.346206	0.0496542	7	0	3	3.6
22	Cc1ccc(cc1)N1c2ccc(cc2C2C1CCC2)C#Cc1ccc(c2c1nsn2)c1ccc(cc1)C(=O)O	6.28			32	1.5372	1.18177	0.217931	13	0	1	0.63		76	4.61395	0.365028	0.149358	7	0	3	5.16
23	Cc1ccc(cc1)N1C2CCCC2c2c1ccc(c2)c1ccc(c2c1nsn2)C#Cc1ccc(cc1)C(=O)O	7.13			33	3.75628	0.504495	0.604899	4	0	5	4.38		80	2.35551	0.410789	0.130879	6	0	2	5.13
24	N#C/C(=C/c1ccc(s1)c1ccc(c2c1nc(c1ccccc1)c(n2)c1ccccc1)c1ccc2c(c1)C1CCCC1N2c1ccc(cc1)C)/C(=O)O	9.2			34	3.0525	1.01906	0.0841238	32	0	7	2.7		81	1.15346	0.929104	0.334039	13	0	1	0.97
25	CCCCCCCCC1(CCCCCCCC)c2cc(sc2c2c1cc(s2)c1ccc(c2c1nc(c1ccccc1)c(n2)c1ccccc1)c1ccc2c(c1)C1CCCC1N2c1ccc(cc1)C)/C=C(\C(=O)O)/C#N	9			35	3.15418	1.01931	0.0605942	34	0	7	1.2		83	2.24586	1.16836	0.43149	13	0	1	2.3
27	CCn1o/c(=c/2\c(=Cc3ccc(cc3)c3ccc4c(c3)C3CCCC3N4c3ccc(cc3)N(c3ccccc3)c3ccccc3)sc(=O)n2CC(=O)O)/sc1=S	2.12			36	4.8762	1.77672	0.0077212	31	0	7	4.8		84	4.91672	0.410715	0.143261	14	0	4	5.87
28	COc1ccc(cc1)N1C2CCCC2c2c1ccc(c2)c1ccc(cc1)C=c1sc(=O)n(/c/1=c\1/on(c(=S)s1)CC)CC(=O)O	4.08			39	3.62949	1.29961	0.00559121	36	0	6	4.4		90	3.42124	0.622092	0.487017	5	0	4	4.53
29	CCn1o/c(=c/2\c(=Cc3ccc(cc3)c3ccc4c(c3)C3CCCC3N4c3ccc(cc3)C(F)(F)F)sc(=O)n2CC(=O)O)/sc1=S	3.58			41	3.23172	0.859699	0.142257	31	0	3	4.5		92	2.32604	0.465793	0.125371	6	0	4	3.69
30	CCCCn1c2ccc(cc2c2c1nc1ccccc1n2)/C=C(/C(=O)O)\C#N	0.77			43	4.47204	1.66107	0.0106118	30	0	3	5.4		95	7.26231	0.55975	0	7	0	10	6.88
31	CCCCn1c2ccc(cc2c2c1nc1ccccc1n2)c1ccc(s1)/C=C(/C(=O)O)\C#N	3.07			44	6.81914	0.408749	0	6	0	5	6.96		97	3.2022	0.0378549	0.973256	3	0	3	3.94
32	CCCCn1c2ccc(cc2c2c1nc1ccccc1n2)C#Cc1ccc(cc1)/C=C(/C(=O)O)\C#N	0.63			46	2.5448	0.45372	0.247866	5	0	8	2.15		102	3.35729	0.581059	0.604117	3	0	1	1.79
33	CCCCCCCCCCCCc1cc(sc1c1cc2c(s1)cc(s2)/C=C(\C(=O)O)/C#N)c1ccc2c(c1)C1C3CCC(C1N2c1ccc(cc1)C=C(c1ccccc1)c1ccccc1)C3	4.38			48	4.99679	0.442673	0.352447	5	0	8	1.66		111	5.23973	0.444618	0.387493	4	0	1	3.99
34	CCCCCCCCn1nc2c(n1)c(c1ccc(s1)/C=C(/C(=O)O)\C#N)c1c(c2c2ccc(s2)c2cccc3c2C2C4CCC(C2N3c2ccccc2)C4)nc(c(n1)c1ccccc1)c1ccccc1	2.7			49	4.55485	0.580602	0.352447	3	0	3	3.55		113	5.97734	1.64198	0.0342621	5	0	6	5.5
35	CCCCCCCCn1nc2c(n1)c(c1ccc(cc1)/C=C(\C(=O)O)/C#N)c1c(c2c2ccc(s2)c2cccc3c2C2C4CCC(C2N3c2ccccc2)C4)nc(c(n1)c1ccccc1)c1ccccc1	1.2			50	4.80021	0.816067	0.116611	6	0	11	2.65		136	3.97782	0.261302	0.769099	3	0	1	5.97
36	CCCCCCCCn1nc2c(n1)c(c1ccc(s1)C(=O)O)c1c(c2c2ccc(s2)c2cccc3c2C2C4CCC(C2N3c2ccccc2)C4)nc(c(n1)c1ccccc1)c1ccccc1	4.8			51	3.70726	0.44604	0.687046	4	0	3	4.24		151	7.37425	1.95166	0.0035479	12	0	9	5.1
37	CCCCCCCCn1nc2c(n1)c(c1ccc(cc1)C(=O)O)c1c(c2c2ccc(s2)c2cccc3c2C2C4CCC(C2N3c2ccccc2)C4)nc(c(n1)c1ccccc1)c1ccccc1	2.8			52	3.70878	0.435509	0.657354	4	0	3	4.23		159	5.78267	0.676404	0.163739	10	0	5	5.3
38	CCCCCCCCn1nc2c(n1)c(c1ccc(s1)/C=C(/C(=O)O)\C#N)c1c(c2c2cccc3c2C2C4CCC(C2N3c2ccccc2)C4)nc(c(n1)c1ccccc1)c1ccccc1	4.8			53	4.07987	0.44604	0.687046	4	0	3	2.96		163	3.16847	0.0493379	0.930603	3	0	3	3.19
39	CCCCCCCCn1nc2c(n1)c(c1ccc(cc1)/C=C(/C(=O)O)\C#N)c1c(c2c2cccc3c2C2C4CCC(C2N3c2ccccc2)C4)nc(c(n1)c1ccccc1)c1ccccc1	4.4			54	2.79489	0.813313	0.0862195	32	0	3	3.1		168	1.95254	0.830165	0.459653	6	0	6	2.45
41	CCCCCCCCn1nc2c(n1)c(c1ccc(s1)/C=C(\C(=O)O)/C#N)c1c(c2c2ccc(s2)c2ccc(cc2)N2C3C4CCC(C3c3c2cccc3)C4)nc(c(n1)c1ccccc1)c1ccccc1	4.5			55	3.97265	1.61706	0.0223027	32	0	3	3.9		170	1.95254	0.830165	0.459653	6	0	6	1.36
42	CCCCCCCCn1nc2c(n1)c(c1ccc(cc1)/C=C(\C(=O)O)/C#N)c1c(c2c2ccc(s2)c2ccc(cc2)N2C3C4CCC(C3c3c2cccc3)C4)nc(c(n1)c1ccccc1)c1ccccc1	3.2			57	4.80104	0.986676	0.129004	4	0	6	4.11
43	CCCCCCCCn1nc2c(n1)c(c1ccc(s1)C(=O)O)c1c(c2c2ccc(s2)c2ccc(cc2)N2C3C4CCC(C3c3c2cccc3)C4)nc(c(n1)c1ccccc1)c1ccccc1	5.4			59	5.48619	0.152618	0.18775	6	0	6	8.34
44	N#CC(=Cc1ccc(s1)c1ccc(s1)c1ccc2c(c1)cc(n2c1ccc2c(c1)C(C)(C)c1c2cccc1)c1ccccc1)C(=O)O	6.96			60	4.29826	1.31587	0.592593	6	1	9	3.92
45	CCCCCCc1ccc(cc1)c1cc2c(n1c1ccc3c(c1)C(C)(C)c1c3cccc1)ccc(c2)c1ccc(s1)c1ccc(s1)C=C(C(=O)O)C#N	7.18			61	4.06006	1.34721	0.734789	8	1	9	4.36
46	N#C/C(=C\c1cc2C3CCCC3N(c2c2c1cccc2)c1ccc(cc1)C=C(c1ccccc1)c1ccccc1)/C(=O)O	2.15			62	4.21	1.38577	0.675275	10	1	9	4.12
47	N#C/C(=C\c1ccc2c(c1)C1CCCC1N2c1ccc(cc1)C=C(c1ccccc1)c1ccccc1)/C(=O)O	2.27			67	3.43507	0.217472	0.628541	4	0	3	5.2
48	OC(=O)CN1C(=S)S/C(=C\c2cc3C4CCCC4N(c3c3c2cccc3)c2ccc(cc2)C=C(c2ccccc2)c2ccccc2)/C1=O	1.66			69	3.52183	1.1446	0.0192234	35	0	3	4.1
49	OC(=O)CN1C(=S)S/C(=C\c2ccc3c(c2)C2CCCC2N3c2ccc(cc2)C=C(c2ccccc2)c2ccccc2)/C1=O	3.55			70	5.88574	1.08502	0.133017	14	0	4	6.05
50	CCN1C(=S)S/C(=c\2/s/c(=C\c3cc4C5CCCC5N(c4c4c3cccc4)c3ccc(cc3)C=C(c3ccccc3)c3ccccc3)/c(=O)n2CC(=O)O)/C1=O	2.65			71	5.55782	0.982967	0.154647	14	0	4	6.54
51	CCCCCCCCCCCCc1cc(sc1c1sc2c(c1)sc(c2)/C=C(\C(=O)O)/C#N)c1ccc(cc1)N1c2ccc(cc2C2C1C1CCC2C1)c1ccc(cc1)OC	4.24			75	2.94476	0.832463	0.0487264	7	0	3	5.41
52	CCCCCCCCCCCCc1cc(sc1c1sc2c(c1)sc(c2)/C=C(\C(=O)O)/C#N)c1ccc2c(c1)C1C3CCC(C1N2c1ccc(cc1)c1cccs1)C3	4.23			77	6.62908	0.338882	0.156076	7	0	3	6.86
53	CCCCCCCCCCCCc1cc(sc1c1cc2c(s1)cc(s2)/C=C(\C(=O)O)/C#N)c1ccc2c(c1)C1C3CCC(C1N2c1ccc(cc1)c1ccc(cc1)OC)C3	2.96			78	5.36225	0.386827	0.0127885	13	1	6	7.99
54	CCCCCCCCn1nc2c(n1)c(c1ccc(cc1)C(=O)O)c1c(c2c2ccc(s2)c2ccc(cc2)N2C3C4CCC(C3c3c2cccc3)C4)nc(c(n1)c1ccccc1)c1ccccc1	3.1			79	3.2022	0.0378549	0.57671	6	0	2	4.55
55	CCCCCCCCn1nc2c(n1)c(c1ccc(cc1)N1c3ccccc3C3C1C1CCC3C1)c1c(c2c2ccc(s2)C(=O)O)nc(c(n1)c1ccccc1)c1ccccc1	3.9			82	2.5657	0.651551	0.211397	13	0	1	2.41
57	CCN1C(=S)S/C(=c\2/s/c(=C\c3ccc4c(c3)C3CCCC3N4c3ccc(cc3)C=C(c3ccccc3)c3ccccc3)/c(=O)n2CC(=O)O)/C1=O	4.11			85	2.95521	0.493018	0.286774	6	0	6	3.38
58	N#C/C(=C\c1ccc(s1)c1ccc2c(c1)c1ccccc1n1c2cc2c1cc(cc2)C)/C(=O)O	6.22			86	2.91944	0.319911	0.338077	5	0	4	4.31
59	N#C/C(=C\c1ccc(s1)c1ccc(s1)c1ccc2c(c1)c1ccccc1n1c2cc2c1cc(cc2)C)/C(=O)O	8.34			87	2.40939	0.684574	0.388158	5	0	7	1.92
60	CCN1C(=S)S/C(=c\2/s/c(=c\3/c(=Cc4ccc5c(c4)C4CCCC4N5c4ccc(cc4)C=C(c4ccccc4)c4ccccc4)sc(=O)n3CC(=O)O)/c(=O)n2CC)/C1=O	3.92			88	2.54847	0.697796	0.464892	6	0	5	1.6
61	CCCCCCCCn1/c(=C/2\SC(=S)N(C2=O)CCCCCCCC)/s/c(=c\2/c(=Cc3ccc4c(c3)C3CCCC3N4c3ccc(cc3)C=C(c3ccccc3)c3ccccc3)sc(=O)n2CC(=O)O)/c1=O	4.36			89	2.35079	0.691121	0.476076	5	0	5	2.1
62	CCCCC(Cn1c(=O)/c(=c/2\c(=Cc3ccc4c(c3)C3CCCC3N4c3ccc(cc3)C=C(c3ccccc3)c3ccccc3)sc(=O)n2CC(=O)O)/s/c/1=C\1/SC(=S)N(C1=O)CC(CCCC)CC)CC	4.12			91	2.34247	0.459305	0.0995315	5	1	4	3.43
63	OC(=O)Cn1c(=O)sc(=Cc2ccc3c(c2)C2CCCC2N3c2ccc(cc2)C=C(c2ccccc2)c2ccccc2)/c/1=c\1/s/c(=C\2/SC(=S)N(C2=O)c2ccccc2)/n(c1=O)c1ccccc1	4.09			93	1.02136	1.40372	0.288299	6	0	3	0.35
64	CCCCCCCCN1C(=S)S/C(=c\2/s/c(=c\3/c(=Cc4ccc5c(c4)C4CCCC4N5c4ccc(cc4)C=C(c4ccccc4)c4ccccc4)sc(=O)n3CC(=O)O)/c(=O)n2c2ccccc2)/C1=O	4.35			94	6.51735	0.498736	0	7	0	7	8.42
65	CCCCCCCCn1c(=O)/c(=c/2\c(=Cc3ccc4c(c3)C3CCCC3N4c3ccc(cc3)C=C(c3ccccc3)c3ccccc3)sc(=O)n2CC(=O)O)/s/c/1=C\1/SC(=S)N(C1=O)c1ccccc1	4.15			96	3.74505	0.172377	0.96657	3	0	3	3.4
67	CCCCCCCCCCCCc1cc(sc1c1sc(c2c1OCCO2)/C=C(/C(=O)O)\C#N)c1ccc(cc1)N1c2ccccc2C2C1C1CCC2C1	5.2			98	4.60661	0.584036	0.0266861	7	0	4	4.02
69	CCCCCCCCn1nc2c(n1)c(c1ccc(cc1)N1c3ccccc3C3C1C1CCC3C1)c1c(c2c2ccc(cc2)/C=C(/C(=O)O)\C#N)nc(c(n1)c1ccccc1)c1ccccc1	4.1			99	2.43364	0.952689	0.35899	5	0	6	1.42
70	CCCCCCCCn1c(c2ccc(cc2)OCCCCCCCC)c(c2c1ccc(c2)c1ccc(s1)/C=C(\C(=O)O)/C#N)c1c2cc(ccc2n(c1c1ccc(cc1)OCCCCCCCC)CCCCCCCC)c1ccc(s1)/C=C(\C(=O)O)/C#N	6.05			100	2.08349	1.1591	0.325387	6	0	3	1.04
71	CCCCCCCCn1c(c2ccc(cc2)OCCCCCCCC)c(c2c1ccc(c2)c1ccc(s1)c1ccc(s1)/C=C(\C(=O)O)/C#N)c1c2cc(ccc2n(c1c1ccc(cc1)OCCCCCCCC)CCCCCCCC)c1ccc(s1)c1ccc(s1)/C=C(\C(=O)O)/C#N	6.54			101	6.27147	1.74347	0.00586448	8	0	7	2.91
72	CCCCCCn1c2ccc(cc2c2c1c1ccccc1C2(CCCCCC)CCCCCC)c1ccc(cc1)/C=C(/C(=O)O)\C#N	6.29			103	3.64351	0.259753	0.752481	3	0	1	4.58
74	CCCCCCn1c2ccc(cc2c2c1c1ccccc1C2(CCCCCC)CCCCCC)c1ccc(cc1)/C=c/1\sc(=C(C#N)C#N)[nH]c1=O	3.6			104	3.69026	0.27843	0.657312	3	0	1	4.46
75	CCCCCCn1c2ccc(cc2c2c1c1ccccc1C2(CCCCCC)CCCCCC)c1ccc(s1)/C=c/1\sc(=C(C#N)C#N)[nH]c1=O	5.41			105	3.90738	0.243339	0.194005	3	0	1	2.53
76	CCCCCCn1c2ccc(cc2c2c1c1ccccc1C2(CCCCCC)CCCCCC)C#Cc1ccc(cc1)/C=C(\C(=O)O)/C#N	5.16			106	3.70593	1.1518	0.402082	11	0	5	3.86
77	CCCCCCn1c2ccc(cc2c2c1c1ccccc1C2(CCCCCC)CCCCCC)C#Cc1ccc(s1)/C=C(/C(=O)O)\C#N	6.86			107	4.65418	0.971894	0.032351	11	0	7	7.63
78	CCCCCCn1c2ccc(cc2c2c1c1ccccc1C2(CCCCCC)CCCCCC)C#Cc1ccc(c2c1nsn2)c1ccc(cc1)C(=O)O	7.99			108	1.23225	1.40372	0.288299	6	0	3	0.046
79	CCCCCCCCCCCCn1c(cc2c1ccc(c2)c1ccc(s1)/C=C(/C(=O)O)\C#N)c1ccc(s1)/C=C(/C(=O)O)\C#N	4.55			110	7.13409	0.650796	0	5	0	5	5.09
80	CCCCCCCCCCCCn1c(cc2c1ccc(c2)c1ccc(s1)/C=C\1/SC(=S)N(C1=O)CC(=O)O)c1ccc(s1)/C=C/1\SC(=S)N(C1=O)CC(=O)O	5.13			112	4.23789	0.617341	0.0836957	5	0	6	6.51
81	CCCCn1c2ccc(cc2c2c1nc1ccccc1n2)C#Cc1cccc(c1)/C=C(/C(=O)O)\C#N	0.97			114	5.39037	1.18087	0.0108251	5	1	6	5.6
82	CCCCn1c2ccc(cc2c2c1nc1ccccc1n2)C#Cc1ccc(s1)/C=C(/C(=O)O)\C#N	2.41			115	4.37425	0.659121	0.0220541	6	1	9	5.93
83	CCCCn1c2ccc(cc2c2c1nc1ccccc1n2)C#Cc1ccc(s1)c1ccc(s1)/C=C(/C(=O)O)\C#N	2.3			116	3.83405	0.172377	0.96657	3	0	3	3
84	CCCCCCCCn1c(c2ccc(cc2)OCCCCCCCC)c(c2c1ccc(c2)c1ccc(o1)/C=C(\C(=O)O)/C#N)c1c2cc(ccc2n(c1c1ccc(cc1)OCCCCCCCC)CCCCCCCC)c1ccc(o1)/C=C(\C(=O)O)/C#N	5.87			117	4.47948	0.222437	0.221774	3	0	9	4
85	CCCCCCCCN1C(=O)S/C(=c\2/c(=Cc3ccc4c(c3)C3CCCC3N4c3ccc(cc3)C=C(c3ccccc3)c3ccccc3)sc(=O)n2CC(=O)O)/C1=O	3.38			118	3.2022	0.0378549	0.611556	3	0	3	7.4
86	CCN1C(=S)S/C(=c\2/c(=Cc3ccc4c(c3)C3CCCC3N4c3ccccc3)sc(=O)n2CC(=O)O)/C1=O	4.31			120	5.38436	1.04835	0.0293638	8	1	3	4.12
87	CCN1C(=S)S/C(=c\2/c(=Cc3ccc4c(c3)C3CCCC3N4c3ccccc3C(=O)O)sc(=O)n2CC)/C1=O	1.92			121	3.92615	1.31483	0.12094	14	0	1	4.31
88	CCN1C(=S)S/C(=c\2/c(=Cc3ccc4c(c3)C3CCCC3N4c3cccc(c3)C(=O)O)sc(=O)n2CC)/C1=O	1.6			122	3.84176	0.786629	0.163407	14	0	1	4.31
89	CCN1C(=S)S/C(=c\2/c(=Cc3ccc4c(c3)C3CCCC3N4c3ccc(cc3)C(=O)O)sc(=O)n2CC)/C1=O	2.1			123	5.25435	0.932413	0.151857	10	0	5	6.85
90	CCN1C(=S)S/C(=c\2/c(=Cc3ccc4c(c3)C3CCCC3N4c3ccc(cc3)CO)sc(=O)n2CC(=O)O)/C1=O	4.53			124	3.64834	0.220971	0.103865	9	0	7	4.64
91	CCN1C(=S)S/C(=c\2/c(=Cc3ccc4c(c3)C3CCCC3N4c3ccc(cc3)CO)sc(=O)n2CCC(=O)O)/C1=O	3.43			125	3.6786	0.176897	0.921815	2	0	3	3.7
92	CCN1C(=S)S/C(=c\2/c(=Cc3ccc4c(c3)C3CCCC3N4c3ccc(cc3)CO)sc(=O)n2CCCC(=O)O)/C1=O	3.69			126	5.61228	0.680269	0.031136	11	0	9	6.9
93	CCCCCCn1cc(c2c1cccc2)/C=C(\c1ccc(s1)/C=C/1\SC(=S)N(C1=O)CC(=O)O)/C#N	0.35			127	5.65931	0.888369	0.119216	10	0	5	5.87
94	N#CC(=Cc1ccc(s1)c1ccc(s1)c1cc2CCCC3c2c(c1)C(c1ccc2c(c1)C(C)(C)c1c2cccc1)N3c1ccccc1)C(=O)O	8.42			128	6.97672	0.390371	0	4	0	5	6.2
95	N#CC(=Cc1ccc(s1)c1ccc(s1)c1ccc2c3c1CCCC3N(C2c1ccc2c(c1)C(C)(C)c1c2cccc1)c1ccccc1)C(=O)O	6.88			129	1.81304	1.1591	0.325387	6	0	3	1.48
96	CCCCCCc1cc(sc1c1sc(c(c1)CCCCCC)C=C(C(=O)O)C#N)c1ccc2c(c1)C1CCCC1N2c1ccccc1	3.4			130	6.35116	1.71408	0	3	1	10	4.68
97	N#C/C(=C\c1ccc(s1)c1ccc2c(c1)CCN2c1ccc(cc1)C=C(c1ccccc1)c1ccccc1)/C(=O)O	3.94			131	5.22085	1.6815	0	3	1	10	6.11
98	N#C/C(=C\c1ccc2c(c1)nc(s2)c1ccc2c(c1)CCN2c1ccc(cc1)C=C(c1ccccc1)c1ccccc1)/C(=O)O	4.02			132	5.97165	0.125812	0.0424995	4	0	3	2.35
99	CCN1C(=S)S/C(=c\2/s/c(=C/c3ccc(s3)c3ccc4c(c3)N(CC4)c3ccc(cc3)C=C(c3ccccc3)c3ccccc3)/c(=O)n2CC(=O)O)/C1=O	1.42			133	4.2381	0.988101	0.419987	5	0	6	5.7
100	CCCCCCn1cc(c2c1cccc2)/C=C(\c1ccc(s1)C=C(C(=O)O)C#N)/C#N	1.04			134	6.4666	0.923477	0	10	0	5	6.21
101	CCN1C(=S)S/C(=c\2/s/c(=C\c3ccc4c(c3)nc(s4)c3ccc4c(c3)CCN4c3ccc(cc3)C=C(c3ccccc3)c3ccccc3)/c(=O)n2CC(=O)O)/C1=O	2.91			135	7.7702	0.442744	0	10	0	5	8.61
102	N#CC(=Cc1ccc2c(c1)[C@@H]1CCC[C@H]1N2c1ccc(cc1)C)C(=O)O	1.79			138	3.68604	0.259753	0.690601	3	0	1	4.42
103	N#CC(=Cc1ccc(s1)c1ccc2c(c1)[C@@H]1CCC[C@H]1N2c1ccc(cc1)C)C(=O)O	4.58			139	2.30611	0.499936	0.146656	8	0	9	5.11
104	N#CC(=Cc1ccc(s1)/C=C/c1ccc2c(c1)[C@@H]1CCC[C@H]1N2c1ccc(cc1)C)C(=O)O	4.46			140	3.13847	0.476989	0.414563	3	0	1	4.03
105	N#CC(=Cc1ccc(s1)/C=C/c1ccc(s1)c1ccc2c(c1)[C@@H]1CCC[C@H]1N2c1ccc(cc1)C)C(=O)O	2.53			141	8.17408	0.549867	0	17	0	5	8.38
106	N#C/C(=C\c1ccc(s1)c1ccc(c2c1nsn2)c1ccc2c(c1)N(c1ccc(cc1)C)C1C2CCC1)/C(=O)O	3.86			142	3.64815	0.224262	0.561091	3	0	3	4.45
107	CCCCCCc1cc(sc1c1ccc(s1)/C=C(/C(=O)O)\C#N)c1ccc(c2c1nsn2)c1ccc2c(c1)N(c1ccc(cc1)C)C1C2CCC1	7.63			143	7.5877	1.80577	0	10	0	6	7.25
108	CCCCCCn1cc(c2c1ccc(c2)OC)/C=C(\c1ccc(s1)/C=C/1\SC(=S)N(C1=O)CC(=O)O)/C#N	0.046			144	7.35823	1.1695	0	10	0	8	8.78
110	CCCCCCC1(CCCCCC)c2ccccc2c2c1ccc(c2)N1C2CCCC2c2c1cc(/C=C/c1ccc(s1)/C=C(/C(=O)O)\C#N)cc2	5.09			145	7.46082	1.80577	0	10	0	6	7.4
111	N#C/C(=C\c1ccc(s1)/C=C/c1ccc2c(c1)N(c1ccc(cc1)C)C1C2CCC1)/C(=O)O	3.99			146	3.70997	0.615642	0.00345701	21	0	1	6.71
112	CCN1C(=S)S/C(=c/2\s/c(=C\c3ccc4c(c3)N(c3ccc(cc3)C=C(c3ccccc3)c3ccccc3)C3C4CCC3)/c(=O)n2CC(=O)O)/C1=O	6.51			147	2.81461	0.470249	0.15037	5	0	8	1.18
113	OC(=O)CN1C(=S)S/C(=c/2\s/c(=C\c3ccc4c(c3)N(c3ccc(cc3)/C=C(\c3ccccc3)/C3=CC=CCC3)C3C4CCC3)/c(=O)n2CC(=O)O)/C1=O	5.5			148	2.33735	0.924997	0.0918393	7	0	10	2.7
114	CCN1C(=S)S/C(=c/2\s/c(=C\c3ccc4c(c3)N(c3ccc(cc3)/C=C(\c3ccccc3)/C3=CC=CCC3)C3C4CCC3)/c(=O)n2CCC(=O)O)/C1=O	5.6			149	2.89233	0.627449	0.469133	4	0	3	1.92
115	CCN1C(=S)S/C(=c/2\s/c(=c/3\s/c(=C\c4ccc5c(c4)N(c4ccc(cc4)/C=C(\c4ccccc4)/C4=CC=CCC4)C4C5CCC4)/c(=O)n3CC(=O)O)/c(=O)n2CC)/C1=O	5.93			150	5.02649	0.739024	0.402082	12	0	5	2.1
116	CCCCCCc1cc(sc1c1cc(c(s1)C=C(C(=O)O)C#N)CCCCCC)c1ccc2c(c1)C1CCCC1N2c1ccc(cc1)OC	3			152	4.43816	0.790134	0.250628	4	0	1	5.5
117	CCCCCCc1cc(sc1c1sc(c(c1)CCCCCC)c1sc(cc1CCCCCC)/C=C(/C(=O)O)\C#N)c1sc(cc1CCCCCC)c1sc2c(c1)n(c1c2cccc1)CC	4			153	4.46287	0.603584	0.403104	3	0	1	5.11
118	CCCCCCc1cc(sc1c1sc(c(c1)CCCCCC)C=C(C(=O)O)C#N)c1cc2c(s1)c1c(n2CC)cccc1	7.4			154	6.34555	0.625834	0	4	0	5	6.95
120	CCCCCCn1cc(c2c1ccc(c2)OC)/C=C(\c1ccc(s1)/C=N/c1ccc(cc1)C(=O)O)/C#N	4.12			155	4.73297	0.533932	0.354126	3	0	1	5.61
121	CCCCn1c(/C=C/c2ccc(n2c2ccc(cc2)c2ccc(cc2)N(c2ccccc2)c2ccccc2)/C=C(\C(=O)O)/C#N)cc2c1ccc(c2)c1ccc(cc1)N(c1ccccc1)c1ccccc1	4.31			156	5.35428	0.506649	0.412733	3	0	1	5.89
122	CCCCCCn1c2ccc(cc2c2c1cccc2)c1ccc(cc1)n1c(ccc1/C=C(\C(=O)O)/C#N)/C=C/c1cc2c(n1CCCC)ccc(c2)c1ccc2c(c1)c1ccccc1n2CCCCCC	4.31			157	6.48953	0.49842	0	4	0	7	7.08
123	CCCCCCc1cc(sc1/C=C(\C(=O)O)/C#N)c1ccc(c2c1nsn2)c1ccc2c(c1)C1CCCC1N2c1ccc(cc1)C	6.85			158	7.34071	0.878302	0	11	0	5	5.3
124	CCCCCCc1cc(sc1c1ccc2c(c1)C1CCCC1N2c1ccc(cc1)C)c1ccc(c2c1nsn2)c1cc(c(s1)/C=C(\C(=O)O)/C#N)CCCCCC	4.64			161	2.6474	0.614527	0.477978	3	0	3	2.6
125	CCCCCCc1cc(sc1c1sc(c(c1)CCCCCC)C=C(C(=O)O)C#N)c1ccc2c(c1)C1CCCC1N2CC	3.7			162	3.66051	0.172377	0.96657	3	0	3	3.78
126	CCCC1(CCC)c2ccc(cc2c2c1cccc2)N1C2CCCC2c2c1ccc(c2)c1ccc(c2c1nsn2)c1ccc(s1)/C=C(\C(=O)O)/C#N	6.9			164	3.63305	0.143676	0.913254	3	0	3	2.08
127	N#C/C(=C/c1ccc(s1)c1ccc(c2c1nsn2)c1ccc2c(c1)C1CCCC1N2c1ccc(cc1)C(C)(C)C)/C(=O)O	5.87			165	3.2022	0.0378549	0.580168	3	0	5	3.36
128	CCCC1(CCC)c2ccc(cc2c2c1cccc2)N1C2CCCC2c2c1ccc(c2)c1ccc(s1)/C=C(\C(=O)O)/C#N	6.2			166	2.06812	0.0555929	0.166816	3	0	3	2.83
129	CCCCCCn1cc(c2c1ccc(c2)OC)/C=C(\c1ccc(s1)C=C(C(=O)O)C#N)/C#N	1.48			167	1.94495	0.986577	0.353407	4	0	6	2.35
130	OC(=O)c1ccc2c(c1)C(=O)/C(=C/c1ccc(s1)c1ccc3c(c1)C1CCCC1N3c1ccc3c(c1)C(C)(C)c1c3cccc1)/C2=O	4.68			169	2.21991	0.9386	0.275029	6	0	6	1.71
131	CCCCCCc1cc(sc1/C=C/1\C(=O)c2c(C1=O)cc(cc2)C(=O)O)c1ccc2c(c1)C1CCCC1N2c1ccc2c(c1)C(C)(C)c1c2cccc1	6.11
132	OC(=O)CN1C(=S)S/C(=C\c2ccc3c(c2)N(c2ccc(cc2)C=C(c2ccccc2)c2ccccc2)C2C3CCC2)/C1=O	2.35
133	CCCCCCCCN1C(=S)SC(=c2sc(=Cc3ccc4c(c3)C3CCCC3N4c3ccc(cc3)C=C(c3ccccc3)c3ccccc3)c(=O)n2CC(=O)O)C1=O	5.7
134	N#C/C(=C\c1ccc(o1)c1ccc(c2c1non2)c1ccc2c(c1)C1CCCC1N2c1ccc(cc1)C)/C(=O)O	6.21
135	CCCCCCc1cc(sc1/C=C(/C(=O)O)\C#N)c1ccc(c2c1non2)c1ccc2c(c1)C1CCCC1N2c1ccc(cc1)C	8.61
136	N#CC(=Cc1ccc(s1)c1ccc(s1)c1ccc2c(c1)C1CCCC1N2c1ccc(cc1)C)C(=O)O	5.97
138	N#C/C(=C\c1ccc(s1)c1ccc2c(c1)C1CCCC1N2c1ccc(cc1)C)/C(=O)O	4.42
139	CCCCCCCCN1C(=O)c2c(C1=O)c(ccc2c1ccc2c(c1)C1CCCC1N2c1ccc(cc1)C)c1ccc(s1)/C=C(/C(=O)O)\C#N	5.11
140	COc1ccc(cc1)N1C2CCCC2c2c1ccc(c2)/C=C(/C(=O)O)\C#N	4.03
141	CCCCCCCCn1nc2c(n1)c(ccc2c1ccc(s1)/C=C(/C(=O)O)\C#N)c1ccc2c(c1)C1CCCC1N2c1ccc(cc1)C	8.38
142	N#C/C(=C\c1ccc(s1)c1sc(c2c1OCCO2)c1ccc2c(c1)C1CCCC1N2c1ccc(cc1)C)/C(=O)O	4.45
143	CCCCCCOc1ccc(cc1)N(c1ccc(cc1)OCCCCCC)c1ccc(cc1)n1c2cc(sc2c2c1cc(s2)c1ccc2c(c1)C1CCCC1N2c1ccc2c(c1)C(CCC)(CCC)c1c2cccc1)/C=C(/C(=O)O)\C#N	7.25
144	CCCCCCOc1ccc(cc1)N(c1ccc(cc1)OCCCCCC)c1ccc(cc1)n1c2cc(sc2c2c1cc(s2)c1ccc2c(c1)C1CCCC1N2c1ccc2c(c1)C(CCC)(CCC)c1c2c2c(c3c1c1ccccc1C3(CCC)CCC)c1c(C2(CCC)CCC)cccc1)/C=C(/C(=O)O)\C#N	8.78
145	CCCCCCN(c1ccc(cc1)n1c2cc(sc2c2c1cc(s2)c1ccc2c(c1)C1CCCC1N2c1ccc2c(c1)C(CCC)(CCC)c1c2cccc1)/C=C(/C(=O)O)\C#N)CCCCCC	7.4
146	CCCCCCc1cc(sc1/C=C(\C(=O)O)/C#N)c1sc2c(c1)c1nn(nc1c1c2sc(c1)c1cc2c(s1)c1c(n2CC(CCCC)CC)cccc1)CC(CCCC)CC	6.71
147	Cc1ccc(cc1)N1C2CCCC2c2c1ccc(c2)c1ccc2c3c1cccc3c(=O)n(c2=O)CC(=O)O	1.18
148	OC(=O)Cn1c(=O)c2ccc(c3c2c(c1=O)ccc3c1ccc2c(c1)C1CCCC1N2c1ccc(cc1)C)c1ccc2c(c1)C1CCCC1N2c1ccc(cc1)C	2.7
149	N#C/C(=C\1/CCCC(=C1)/C=C/c1ccc2c(c1)C1CCCC1N2c1ccc(cc1)C)/C(=O)O	1.92
150	N#CC(=Cc1ccc(s1)c1cnc(c2c1nsn2)c1ccc2c(c1)C1CCCC1N2c1ccc(cc1)C)C(=O)O	2.1
151	CCCCC(CC1(CC(CCCC)CC)c2cc(sc2c2c1cc(s2)c1ccc(s1)C=C(C(=O)O)C#N)c1cnc(c2c1nsn2)c1ccc2c(c1)C1CCCC1N2c1ccc(cc1)C)CC	5.1
152	COc1ccc2c(c1)ccc(c2)N1C2CCCC2c2c1ccc(c2)/C=C/1\SC(=S)N(C1=O)CC(=O)O	5.5
153	COc1ccc(cc1)N1c2ccc(cc2C2C1CCC2)/C=C/1\SC(=S)N(C1=O)CC(=O)O	5.11
154	CCCc1c(/C=C(/C(=O)O)\C#N)sc2c1sc(c2)c1ccc2c(c1)C1CCCC1N2c1ccc2c(c1)C(CCC)(CCC)c1c2cccc1	6.95
155	CCCCCCOc1ccc(cc1)N1C2CCCC2c2c1ccc(c2)c1cc2c(s1)c(c(s2)/C=C(/C(=O)O)\C#N)CCC	5.61
156	CCCc1c(/C=C(/C(=O)O)\C#N)sc2c1sc(c2)c1ccc2c(c1)C1CCCC1N2c1ccc(cc1)OC(C)(C)C	5.89
157	CCCc1c(/C=C(/C(=O)O)\C#N)sc2c1sc(c2)c1ccc2c(c1)C1CCCC1N2c1ccc2c(c1)C(CCC)(CCC)c1c2c2c(c3c1c1ccccc1C3(CCC)CCC)c1c(C2(CCC)CCC)cccc1	7.08
158	N#C/C(=C\c1ccc(cc1)c1ccc(c2c1nsn2)c1ccc2c(c1)C1CCCC1N2c1ccc(cc1)C)/C(=O)O	5.3
159	N#C/C(=C\c1ccc(s1)c1ccc(c2c1nsn2)c1ccc2c(c1)C1CCCC1N2c1ccc(cc1)C)/C(=O)O	5.3
161	N#C/C(=C/c1ccc2c(c1)C1CCCC1N2c1ccc(cc1)C=C(c1ccccc1)c1ccccc1)/C(=O)O	2.6
162	N#C/C(=C/c1ccc(s1)c1ccc2c(c1)C1CCCC1N2c1ccc(cc1)C=C(c1ccccc1)c1ccccc1)/C(=O)O	3.78
163	N#C/C(=C/c1ccc(s1)c1ccc(s1)c1ccc2c(c1)C1CCCC1N2c1ccc(cc1)C=C(c1ccccc1)c1ccccc1)/C(=O)O	3.19
164	N#CC(=Cc1ccc(s1)c1ccc(s1)c1ccc(s1)c1ccc2c(c1)C1CCCC1N2c1ccc(cc1)C=C(c1ccccc1)c1ccccc1)C(=O)O	2.08
165	CCCCCCc1cc(sc1c1ccc2c(c1)C1CCCC1N2c1ccc(cc1)C=C(c1ccccc1)c1ccccc1)/C=C(\C(=O)O)/C#N	3.36
166	OC(=O)CN1C(=S)S/C(=C/c2ccc(s2)c2ccc3c(c2)C2CCCC2N3c2ccc(cc2)C=C(c2ccccc2)c2ccccc2)/C1=O	2.83
167	CCN1C(=S)S/C(=c\2/s/c(=C/c3ccc(s3)c3ccc4c(c3)C3CCCC3N4c3ccc(cc3)C=C(c3ccccc3)c3ccccc3)/c(=O)n2CC(=O)O)/C1=O	2.35
168	CC(c1cc(cc(c1)C(C)(C)C)CN1C(=S)S/C(=c\2/s/c(=C/c3ccc(s3)c3ccc4c(c3)C3CCCC3N4c3ccc(cc3)C=C(c3ccccc3)c3ccccc3)/c(=O)n2CC(=O)O)/C1=O)(C)C	2.45
169	OC(=O)Cn1c(=O)/c(=C\c2ccc(s2)c2ccc(s2)c2ccc3c(c2)C2CCCC2N3c2ccc(cc2)C=C(c2ccccc2)c2ccccc2)/s/c/1=C\1/SC(=S)N(C1=O)Cc1cc(cc(c1)C(C)(C)C)C(C)(C)C	1.71
170	OC(=O)Cn1c(=O)/c(=C\c2ccc(s2)c2ccc(s2)c2ccc(s2)c2ccc3c(c2)C2CCCC2N3c2ccc(cc2)C=C(c2ccccc2)c2ccccc2)/s/c/1=C\1/SC(=S)N(C1=O)Cc1cc(cc(c1)C(C)(C)C)C(C)(C)C	1.36

## Sheet: Diphenylamines
Diphenylamine Dye					Training Set								Test Set
ID	SMILES	PCE			ID	RA function(LK)	SD similarity(LK)	F01[C-N]	StsC	F04[N-S]	PCE		ID	RA function(LK)	SD similarity(LK)	F01[C-N]	StsC	F04[N-S]	PCE
1	N#C/C(=C\c1ccc(s1)c1ccc(s1)c1ccc(s1)N(c1ccccc1)c1ccccc1)/C(=O)O	3.75			2	6.86163	0.0350489	6	1.84219	1	5.1		1	4.46516	0.0267475	4	1.72782	0	3.75
2	CCCCCCOc1ccc(cc1)N(c1ncc(s1)c1sc2c(c1)c1cc(sc1c(c2OCCCCCC)OCCCCCC)/C=C(/C(=O)O)\C#N)c1ccc(cc1)OCCCCCC	5.1			3	5.12694	0.0208031	4	1.84913	0	5.4		4	5.79698	0.0693143	6	1.89399	1	4.8
3	CCCCCCOc1ccc(cc1)N(c1ccc(s1)c1sc2c(c1)c1cc(sc1c(c2OCCCCCC)OCCCCCC)/C=C(/C(=O)O)\C#N)c1ccc(cc1)OCCCCCC	5.4			7	7.32675	0.33695	8	1.64435	0	7.05		5	5.31332	0.203376	4	1.90094	0	6.6
4	CCCCCCOc1ccc(cc1)N(c1ncc(s1)c1sc2c(c1)C(c1c2sc(c1)/C=C(/C(=O)O)\C#N)(CCCCCC)CCCCCC)c1ccc(cc1)OCCCCCC	4.8			8	6.77193	0.33274	8	1.67113	0	7.64		6	7.25053	0.183707	8	1.64574	0	6.72
5	CCCCCCOc1ccc(cc1)N(c1ccc(s1)c1sc2c(c1)C(c1c2sc(c1)/C=C(/C(=O)O)\C#N)(CCCCCC)CCCCCC)c1ccc(cc1)OCCCCCC	6.6			10	3.02781	0.646559	4	8.29257	0	1.99		9	2.51337	0.0495302	4	8.30107	0	0.61
6	N#CC(=Cc1cnc(nc1)c1ccc(s1)N(c1ccccc1)c1ccccc1)C(=O)O	6.72			13	3.82697	0.0186942	7	7.76829	2	3.16		11	3.10164	0.139073	7	8.06687	0	1.02
7	N#CC(=Cc1cnc(nc1)c1ccc(s1)N(c1ccc(cc1)OC)c1ccc(cc1)OC)C(=O)O	7.05			14	2.0275	0.647173	4	8.31022	0	3		12	0.756764	0.00661559	11	4.74072	0	0.56
8	CCCCCCOc1ccc(cc1)N(c1ccc(s1)c1ncc(cn1)C=C(C(=O)O)C#N)c1ccc(cc1)OCCCCCC	7.64			15	6.59927	0.0540347	6	1.77153	1	6.66		16	6.46642	0.127844	6	1.73226	1	7.16
9	N#C/C(=C\c1cccc(c1)C#Cc1ccc2c(c1)C(CC)(CC)c1c2ccc(c1)N(c1ccccc1)c1ccccc1)/C(=O)O	0.61			17	6.91279	0.103639	6	1.79892	2	6.19		24	4.22056	0.085017	4	1.77862	0	4.26
10	N#C/C(=C\c1ccc(s1)C#Cc1ccc2c(c1)C(CC)(CC)c1c2ccc(c1)N(c1ccccc1)c1ccccc1)/C(=O)O	1.99			18	4.98384	0.237368	4	1.73756	0	3.74		32	0.436563	0.513637	7	0	0	1.53
11	CCCCCCN(c1ccc(cc1)/C=C(/c1ccc(cc1)c1ccc(cc1)/C=C(\C(=O)O)/C#N)\C#N)c1ccc(cc1)/C=C(/c1ccc(cc1)c1ccc(cc1)/C=C(\C(=O)O)/C#N)\C#N	1.02			19	4.60987	0.000329693	7	1.77616	0	3.52
12	CCCCCCN(c1ccc(cc1)/C=C(/c1ccc(cc1)c1ccc(cc1)/C=C/1\SC(=S)N(C1=O)CC(=O)O)\C#N)c1ccc(cc1)/C=C(/c1ccc(cc1)c1ccc(cc1)/C=C\1/SC(=S)N(C1=O)CC(=O)O)\C#N	0.56			20	4.35705	0.0625704	7	1.77212	0	4.1
13	CCCCCCN(c1ccc(cc1)/C=C(/c1ccc(s1)/C=C(/C(=O)O)\C#N)\C#N)c1ccc(cc1)/C=C(/c1ccc(s1)/C=C(/C(=O)O)\C#N)\C#N	3.16			21	3.82351	0.0629	7	1.76977	0	5.12
14	N#C/C(=C\c1ccc(cc1)C#Cc1ccc2c(c1)C(CC)(CC)c1c2ccc(c1)N(c1ccccc1)c1ccccc1)/C(=O)O	3			22	4.0771	0.256413	4	1.7013	0	5.22
15	CCCCCCCCOc1c(OCCCCCCCC)c(c2ccc(s2)N(c2ccccc2)c2ccccc2)c2c(c1c1ccc(cc1)/C=C(\C(=O)O)/C#N)nsn2	6.66			23	3.00974	0.00622623	5	4.34066	2	4.1
16	CCCCCCCCOc1c(OCCCCCCCC)c(c2ccc(s2)N(c2ccccc2)c2ccccc2)c2c(c1c1ccc(o1)/C=C(\C(=O)O)/C#N)nsn2	7.16			25	4.2829	0.142072	4	1.79665	0	5.15
17	CCCCCCCCOc1c(OCCCCCCCC)c(c2ccc(s2)N(c2ccccc2)c2ccccc2)c2c(c1c1ccc(s1)/C=C(\C(=O)O)/C#N)nsn2	6.19			26	6.93669	0.118951	6	1.89909	2	7.1
18	N#C/C(=C\c1ccc(s1)c1ccc(s1)c1ccc(s1)N(c1cccc2c1cccc2)c1ccccc1)/C(=O)O	3.74			27	6.69073	0.0512381	6	1.91705	2	8
19	CCCCCCCCCCCCN(c1ccc(cc1)n1c2ccc(cc2c2c1ccc(c2)C(C)(C)C)C(C)(C)C)c1ccc(cc1)c1ccc(s1)/C=C(/C(=O)O)\C#N	3.52			28	2.31326	0.200663	6	1.6696	0	2.8
20	CCCCCCCCCCCCN(c1ccc(cc1)n1c2ccc(cc2c2c1ccc(c2)C(C)(C)C)C(C)(C)C)c1ccc(cc1)c1ccc(s1)c1ccc(s1)/C=C(/C(=O)O)\C#N	4.1			29	2.86652	0.241396	8	1.70849	0	1.99
21	CCCCCCCCCCCCN(c1ccc(cc1)n1c2ccc(cc2c2c1ccc(c2)C(C)(C)C)C(C)(C)C)c1ccc(cc1)c1ccc(s1)c1ccc(s1)c1ccc(s1)/C=C(/C(=O)O)\C#N	5.12			30	4.61013	9.00443e-05	6	1.71644	0	3.09
22	N#CC(=Cc1ccc(cc1)c1ccc(s1)N(c1ccccc1)c1ccccc1)C(=O)O	5.22			31	4.4636	0.0190449	4	1.7385	0	4.62
23	CCCCCCN(c1ccc(cc1)/C=C(/c1ccc(s1)C=C(C(=O)O)C(=O)O)\C#N)c1ccc(cc1)/C=C(/c1ccc(s1)C=C(C(=O)O)C(=O)O)\C#N	4.1			33	1.31541	0.016381	7	0	0	0.44
24	CCCCc1ccc(cc1)N(c1ccc2c(c1)C(c1ccccc1)(c1ccccc1)c1c2ccc(c1)c1ccc(cc1)C=C(C(=O)O)C#N)c1ccc(cc1)CCCC	4.26			34	0.403718	0.19766	10	0	0	1
25	CCCCCCC1(CCCCCC)c2cc(ccc2c2c1cc(cc2)N(c1ccc(cc1)CCCC)c1ccc(cc1)CCCC)c1ccc(cc1)C=C(C(=O)O)C#N	5.15			35	0.909008	0.177502	11	0	0	0.4
26	CCCCCCOc1ccc(cc1)N(c1ccc(c2c1nsn2)c1sc2c(c1)C(c1c2sc(c1)/C=C(/C(=O)O)\C#N)(CCCCCC)CCCCCC)c1ccc(cc1)OCCCCCC	7.1
27	CCCCCCC1(CCCCCC)c2cc(sc2c2c1cc(s2)c1ccc(c2c1nsn2)N(c1ccc(cc1)c1ccc(cc1OCCCC)OCCCC)c1ccc(cc1)c1ccc(cc1OCCCC)OCCCC)/C=C(/C(=O)O)\C#N	8
28	N#C/C(=C\c1ccc(o1)C1=Nc2c(C1(C)C)cc(cc2)N(c1ccccc1)c1ccccc1)/C(=O)O	2.8
29	N#C/C(=C\c1cnc(s1)C1=Nc2c(C1(C)C)cc(cc2)N(c1ccccc1)c1ccccc1)/C(=O)O	1.99
30	N#C/C(=C\c1ccc(cc1)C1=Nc2c(C1(C)C)cc(cc2)N(c1ccccc1)c1ccccc1)/C(=O)O	3.09
31	CCCCc1ccc(cc1)N(c1ccc2c(c1)Cc1c2ccc(c1)c1ccc(cc1)C=C(C(=O)O)C#N)c1ccc(cc1)CCCC	4.62
32	CCCCCCCCN(c1ccccc1)c1ccc(cc1)C=C1C(=O)NC(=O)NC1=O	1.53
33	CCCCCCCCN(c1ccccc1)c1ccc(cc1)C=C1C(=O)NC(=S)NC1=O	0.44
34	CCCCCCCCC1(CC=C(C=C1)NC(=C1C(=O)NC(=O)NC1=O)c1ccccc1)C=C1C(=O)NC(=O)NC1=O	1
35	CCCCCCCCN(c1ccc(cc1)C=C1C(=O)NC(=S)NC1=O)c1ccc(cc1)C=C1C(=O)NC(=S)NC1=O	0.4
